# Supplementary material for: Efficient synthesis of novel N-substituted 2-carboxy-4-quinolones via lithium bis(trimethylsilyl)amide (LiHMDS)-induced in situ cyclocondensation reaction
Source: Royal Society of Chemistry journal article supplement (doi:10.1039/c6ra28631c), 2017-01-01
Supplement: c6ra28631c1.pdf [file c6ra28631c1.pdf]

## Supporting information

### Efficient synthesis of novel *N*-substituted 2-carboxy-4-quinolones via lithium bis(trimethylsilyl)amide (LiHMDS)-induced *in situ* cyclocondensation reaction

Phool Hasan<sup>a,b</sup>, Babita Aneja<sup>a</sup>, Mir M. Masood<sup>a</sup>, Md. Belal Ahmad<sup>b</sup>, Umesh Yadava<sup>c</sup>, Constantin G. Daniliuc<sup>d</sup>, Mohammad Abid<sup>a\*†</sup>

<sup>a</sup>Medicinal Chemistry Lab, Department of Biosciences, Jamia Millia Islamia (A Central University), Jamia Nagar, New Delhi 110025, India

<sup>b</sup>Department of Chemistry, TNB College, TM Bhagalpur University, Bhagalpur 812007, Bihar, India

<sup>c</sup>Department of Physics, Deen Dayal Upadhyay Gorakhpur University, Gorakhpur, UP 273009, India

<sup>d</sup>Organisch-Chemisches Institut, Westfälische Wilhelm-Universität Münster 48149, Germany

† Present address: Eppley Institute for Research in Cancer and Allied Diseases, University of Nebraska Medical Center, Omaha, NE 68198-6805, USA

\* E-mail: [mabid@jmi.ac.in](mailto:mabid@jmi.ac.in) (M. Abid)

### Content

1. General information
2. General synthetic procedures and characterization data of all products
3. References
4. Spectroscopic data of representative compounds
5. X-ray crystallographic data of 3c and 3e

## 1. General information

All the reagents and solvents (analytical grade) were procured from Sigma-Aldrich, USA. Reactions were monitored by thin-layer chromatographic analysis on precoated Merck silica gel 60 F<sub>254</sub> TLC aluminum sheets. Infrared spectra were recorded on Agilent Cary 630 FT-IR spectrometer; wave numbers are given in cm<sup>-1</sup>. <sup>1</sup>H and <sup>13</sup>C NMR spectra were obtained on Bruker Spectrospin DPX-300 spectrometer at 300 MHz and 75 MHz, respectively or a Bruker Avance II 400 spectrometer at 400 MHz. <sup>1</sup>H and <sup>13</sup>C NMR chemical shifts ( $\delta$ ) values are reported in parts per million (ppm) relative to residual solvent CDCl<sub>3</sub>,  $\delta$  7.26 and 77.16; DMSO-*d*<sub>6</sub>,  $\delta$  2.54 and 39.5, respectively with tetramethylsilane (TMS) as an internal standard. Splitting patterns are designated as follows: s (singlet), d (doublet), t (triplet), q (quartet), m (multiplet) or brs (broad) and coupling constants (*J*) are expressed in Hertz (Hz). Mass spectra were recorded on Agilent RRLC MS 6320 ion trap spectrometer fitted with an electrospray ionization (ESI) interface or Waters ZQ Single Quadrupole Detector (SQD) electron spray ionization mass spectrometer. Ultra-performance liquid chromatography was performed on API 2000 triple quadrupole detector (TQD) mass spectrometer (UPLC-MS/MS). Melting points were recorded on a digital Buchi melting point apparatus (M-560) and are uncorrected. Purification of the compounds was carried out by flash column chromatography (silica gel, 230-400 mesh size, Merck, Germany) with the indicated solvent.

## 2. General synthetic procedures and characterization data of all products

### 2.1. General procedure for reductive amination (3a-j) (Representative example 3a)

**Method A:** To a solution of 1-ethyl-1*H*-pyrazole-4-carboxaldehyde **1a** (1.2 g, 9.6 mmol, 1.0 eq) in DCE (22 ml) was added 2'-aminoacetophenone, **2** (1.3 g, 9.6 mmol, 1.0 eq). The reaction mixture was stirred at room temperature for 30 min. Sodium triacetoxyborohydride [Na(OAc)<sub>3</sub>BH] (4.051 g, 19.2 mmol, 2.0 eq) was added to the reaction mixture followed by acetic acid (0.576 g, 9.6 mmol, 1.0 eq) and the stirring was continued further at room temperature for 16 hr. The reaction was quenched with aqueous solution of sodium bicarbonate (50 mL) and the product was extracted with dichloromethane (3×50 mL). The combined organic phase was washed with brine (50 mL), dried over anhyd. sodium sulphate and concentrated

under *vacuo*. The crude obtained was purified by column chromatography eluted by a solution of ethyl acetate:hexane (2:8) to yield pure secondary amine **3a**.<sup>1</sup>

**Method B:** To a solution of 1-ethyl-1*H*-pyrazole-4-carboxaldehyde **1a** (1.2 g, 9.6 mmol, 1.0 eq) in methanol (22 ml) was added 2'-aminoacetophenone, **2** (1.3 g, 9.6 mmol, 1.0 eq). The reaction mixture was stirred at room temperature for 30 min. Sodium cyanoborohydride [NaCNBH<sub>3</sub>] (1.2 g, 19.2 mmol, 2.0 eq) and acetic acid (0.576 g, 9.6 mmol, 1.0 eq) was added to the reaction mixture and the stirring was continued further at room temperature for 16 hr. The reaction mixture was concentrated under *vacuo* and aqueous solution of sodium bicarbonate (50 mL) was added to the residue. The product was extracted with dichloromethane (3×50 mL) and the combined organic layers were washed with brine (50 mL), dried over anhyd. sodium sulphate and concentrated. The crude product was purified by column chromatography eluted by ethyl acetate:hexane (2:8) to yield pure secondary amine **3a**.<sup>2</sup>

**Method C:** 1-Ethyl-1*H*-pyrazole-4-carboxaldehyde **1a** (1.2 g, 9.6 mmol, 1.0 eq) was dissolved in THF (20 mL) and to this solution were added 2'-aminoacetophenone, **2** (1.3 g, 9.6 mmol, 1.0 eq) and dibutyltindichloride (0.583 g, 1.92 mmol, 0.2 eq). After stirring for 20 min, phenyl silane (1.036 g, 9.6 mmol, 1.0 eq) was added and the reaction mixture was stirred further at room temperature for 16 hr. After completion of the reaction the reaction mixture was diluted with water and the compound was extracted with ethyl acetate. The combined organic layers were washed with brine solution, dried over anhyd. sodium sulphate and concentrated under *vacuo*. The product was purified by column chromatography eluted with ethyl acetate: hexane (2:8) to yield pure product **3a** in quantitative yield.<sup>3</sup>

#### **1-((2-((1-ethyl-1*H*-pyrazol-4-yl)methyl)amino)phenyl)ethanone (3a)**

Yellow oil, yield: 76%, R<sub>f</sub> = 0.60 (Ethyl acetate/ hexane, 40:60), <sup>1</sup>H NMR (400 MHz, DMSO-*d*<sub>6</sub>) (δ, ppm): 8.86 (s, 1H), 7.83 (d, *J* = 7.6 Hz, 1H), 7.71 (s, 1H), 7.41-7.37 (m, 2H), 6.84 (d, *J* = 8.5 Hz, 1H), 6.61 (t, *J* = 7.3 Hz, 1H), 4.24 (d, *J* = 4.9 Hz, 2H) 4.09 (q, *J* = 7.2 Hz, 2H), 2.50 (s, 3H), 1.34 (t, *J* = 7.2 Hz, 3H). <sup>13</sup>C NMR (75 MHz, CDCl<sub>3</sub>) (δ, ppm): 201.36, 148.62, 136.23,

134.54, 129.67, 125.82, 120.64, 118.03, 114.25, 111.82, 54.59, 39.02, 28.95, 15.43. ESI-MS ( $m/z$ ): 244.14 [M+H]<sup>+</sup>.

**1-((2-((1-(4-methoxyphenyl)-3-(pyridin-4-yl)-1H-pyrazol-4-yl)methyl)amino)phenyl)ethanone (3b)**

Yellow solid, yield: 87%,  $R_f$  = 0.50 (Ethyl acetate/ hexane, 40:60), mp 112-114 °C, <sup>1</sup>H NMR (400 MHz, DMSO-*d*<sub>6</sub>) ( $\delta$ , ppm): 8.91 (m, 2H), 8.57-8.54 (m, 2H), 8.12 (d,  $J$  = 8.3 Hz, 1H), 7.86-7.79 (m, 3H), 7.49-7.46 (m, 1H), 7.42 (t,  $J$  = 7.2 Hz, 1H), 7.08 (d,  $J$  = 8.9 Hz, 2H), 6.89 (d,  $J$  = 8.5 Hz, 1H), 6.66 (t,  $J$  = 6.9 Hz, 1H), 4.50 (s, 2H), 3.81 (s, 3H), 3.32 (s, 3H). <sup>13</sup>C NMR (75 MHz, CDCl<sub>3</sub>) ( $\delta$ , ppm): 201.06, 158.48, 150.29, 148.94, 148.71, 147.68, 135.19, 134.93, 133.57, 132.79, 129.26, 127.82, 123.54, 120.80, 118.43, 118.03, 114.85, 114.55, 111.89, 55.59, 38.02, 27.95. ESI-MS ( $m/z$ ): 399.0 [M+H]<sup>+</sup>.

**1-((2-((1,3-diphenyl-1H-pyrazol-4-yl)methyl)amino)phenyl)ethanone (3c)**

Light yellow oil, yield: 84%,  $R_f$  = 0.54 (Ethyl acetate/ hexane, 40:60), <sup>1</sup>H NMR (400 MHz, DMSO-*d*<sub>6</sub>) ( $\delta$ , ppm): 8.95 (s, 1H), 8.93 (s, 1H), 7.89-7.84 (m, 3H), 7.75 (d,  $J$  = 7.2 Hz, 2H), 7.52 (t,  $J$  = 7.9 Hz, 2H), 7.47-7.37 (m, 4H), 7.33 (t,  $J$  = 7.3 Hz, 1H), 6.87 (d,  $J$  = 8.4 Hz, 1H), 6.65 (t,  $J$  = 7.5 Hz, 1H), 4.48 (s, 2H), 2.51 (s, 3H). <sup>13</sup>C NMR (75 MHz, CDCl<sub>3</sub>) ( $\delta$ , ppm): 199.89, 150.45, 148.78, 140.19, 134.94, 133.64, 130.79, 129.53, 128.45, 128.12, 127.62, 126.81, 123.23, 120.61, 118.37, 118.01, 115.85, 113.58, 37.02, 28.95. ESI-MS ( $m/z$ ): 368.1 [M+H]<sup>+</sup>.

**1-((2-((5-bromopyridin-2-yl)methyl)amino)phenyl)ethanone (3d)**

Light yellow solid, yield: 61%,  $R_f$  = 0.44 (Ethyl acetate/ hexane, 40:60), mp 88-90 °C, <sup>1</sup>H NMR (300 MHz, CDCl<sub>3</sub>) ( $\delta$ , ppm): 9.36 (s, 1H), 8.58-8.51 (m, 2H), 7.80 (d,  $J$  = 7.8 Hz, 2H), 7.34-7.27 (m, 1H), 6.67 (t,  $J$  = 7.5 Hz, 1H), 6.55 (d,  $J$  = 8.7 Hz, 1H), 4.48 (d, 2H,  $J$  = 6.0 Hz, CH<sub>2</sub>), 2.62 (s, 3H, CH<sub>3</sub>). <sup>13</sup>C NMR (75 MHz, CDCl<sub>3</sub>) ( $\delta$ , ppm): 201.76, 155.69, 152.24, 149.67,

145.23, 136.03, 129.78, 129.47, 125.45, 118.54, 115.93, 113.62, 111.92, 46.82, 28.78. ESI-MS ( $m/z$ ): 305.1 [M+H]<sup>+</sup>, 307.0 [(M+2)+H]<sup>+</sup>.

**1-((2-((4-chloropyridin-2-yl)methyl)amino)phenyl)ethanone (3e)**

Light yellow solid, yield: 67%,  $R_f$  = 0.44 (Ethyl acetate/ hexane, 40:60), mp 78-81 °C, <sup>1</sup>H NMR (400 MHz, DMSO-*d*<sub>6</sub>) ( $\delta$ , ppm): 9.41 (s, 1H), 8.54 (s, 1H), 7.86 (d,  $J$  = 7.5 Hz, 1H), 7.44 (s, 2H), 7.35 (t,  $J$  = 7.4 Hz, 1H), 6.68-6.61 (m, 2H), 4.58 (d,  $J$  = 5.3 Hz, 2H), 2.57 (s, 3H). <sup>13</sup>C NMR (75 MHz, CDCl<sub>3</sub>) ( $\delta$ , ppm): 201.21, 160.71, 150.40, 145.06, 135.14, 132.81, 122.59, 121.30, 118.29, 115.04, 112.09, 48.28, 28.00. ESI-MS ( $m/z$ ): 261.2 [M+H]<sup>+</sup>.

**1-(2-(4-(1H-pyrazol-1-yl)benzylamino)phenyl)ethanone (3f)**

Off-white solid, yield: 98%,  $R_f$  = 0.44 (Ethyl acetate/ hexane, 40:60), mp 141-143 °C, <sup>1</sup>H NMR (400 MHz, DMSO-*d*<sub>6</sub>) ( $\delta$ , ppm): 9.34 (s, 1H), 7.88 (s, 1H), 7.77 (d,  $J$  = 7.9 Hz, 1H), 7.70 (s, 1H), 7.64 (d,  $J$  = 8.4 Hz, 2H), 7.41 (d,  $J$  = 8.3 Hz, 2H), 7.28 (t,  $J$  = 7.8 Hz, 1H), 6.63-6.59 (m, 2H), 6.44 (s, 1H), 4.49 (d,  $J$  = 5.6 Hz, 2H), 2.61 (s, 3H). <sup>13</sup>C NMR (75 MHz, CDCl<sub>3</sub>) ( $\delta$ , ppm): 201.15, 150.73, 141.03, 139.29, 137.08, 135.06, 132.77, 127.99, 126.74, 119.53, 117.97, 114.64, 112.20, 107.56, 46.19, 28.03. ESI-MS ( $m/z$ ): 292.1 [M+H]<sup>+</sup>.

**1-(2-(4-(trifluoromethyl)benzylamino)phenyl)ethanone (3g)**

Light yellow solid, yield: 98%,  $R_f$  = 0.54 (Ethyl acetate/ hexane, 40:60), mp 83-85 °C, <sup>1</sup>H NMR (300 MHz, CDCl<sub>3</sub>) ( $\delta$ , ppm): 9.39 (s, 1H), 7.79 (d,  $J$  = 8.1 Hz, 1H), 7.58 (d,  $J$  = 7.8 Hz, 2H), 7.44 (d,  $J$  = 8.1 Hz, 2H), 7.31-7.25 (m, 1H), 6.63 (t,  $J$  = 7.5 Hz, 1H), 6.55 (d,  $J$  = 8.4 Hz, 1H), 4.52 (d,  $J$  = 5.7 Hz, 2H), 2.62 (s, 3H). <sup>13</sup>C NMR (75 MHz, CDCl<sub>3</sub>) ( $\delta$ , ppm): 201.24, 150.58, 143.04, 135.09, 132.82, 129.68, 127.13, 125.66, 122.38, 118.11, 114.90, 112.05, 46.29, 27.99. ESI-MS ( $m/z$ ): 294.1 [M+H]<sup>+</sup>.

**1-(2-(4-(trifluoromethoxy)benzylamino)phenyl)ethanone (3h)**

Light yellow solid, yield: 93%,  $R_f = 0.74$  (Ethyl acetate/ hexane, 40:60), mp 70-73 °C,  $^1\text{H}$  NMR (300 MHz,  $\text{CDCl}_3$ ) ( $\delta$ , ppm): 9.33 (s, 1H), 7.78 (d,  $J = 7.8$  Hz, 1H), 7.37-7.25 (m, 3H), 7.17 (d,  $J = 8.1$  Hz, 2H), 6.65-6.58 (m, 2H), 4.46 (d,  $J = 5.7$  Hz, 2H), 2.60 (s, 3H).  $^{13}\text{C}$  NMR (75 MHz,  $\text{CDCl}_3$ ) ( $\delta$ , ppm): 201.16, 150.65, 148.31, 137.52, 135.09, 132.79, 128.29, 121.22, 118.02, 114.76, 112.04, 46.01, 27.98. ESI-MS ( $m/z$ ): 255.1, 283.3, 311.4.

### **1-((2-(furan-2-ylmethyl)amino)phenyl)ethanone (3i)**

Light yellow solid, yield: 95%,  $R_f = 0.64$  (Ethyl acetate/ hexane, 40:60), mp 76-78 °C,  $^1\text{H}$  NMR (300 MHz,  $\text{CDCl}_3$ ) ( $\delta$ , ppm): 9.19 (s, 1H), 7.76 (d,  $J = 8.1$  Hz, 1H), 7.37-7.32 (m, 2H), 6.76 (d,  $J = 8.4$  Hz, 1H), 6.63 (t,  $J = 7.5$  Hz, 1H), 6.31-6.22 (m, 2H), 4.42 (d,  $J = 5.4$  Hz, 2H), 2.58 (s, 3H).  $^{13}\text{C}$  NMR (75 MHz,  $\text{CDCl}_3$ ) ( $\delta$ , ppm): 200.98, 152.12, 150.52, 141.95, 135.00, 132.70, 118.05, 114.70, 111.84, 110.34, 106.87, 40.09, 27.94. ESI-MS ( $m/z$ ): 234.4.

### **1-((2-((2-bromo-3-fluoropyridin-4-yl)methyl)amino)phenyl)ethanone (3j)**

Off-white solid, yield: 98%,  $R_f = 0.44$  (Ethyl acetate/ hexane, 40:60), mp 90-92 °C,  $^1\text{H}$  NMR (300 MHz,  $\text{CDCl}_3$ ) ( $\delta$ , ppm): 9.39 (s, 1H), 8.09 (d,  $J = 4.8$  Hz, 1H), 7.82 (d,  $J = 8.1$  Hz, 1H), 7.35-7.29 (m, 1H), 7.20 (t,  $J = 4.9$  Hz, 1H), 6.69 (t,  $J = 7.6$  Hz, 1H), 6.47 (d,  $J = 8.7$  Hz, 1H), 4.59 (d,  $J = 6.0$  Hz, 2H), 2.64 (s, 3H).  $^{13}\text{C}$  NMR (75 MHz,  $\text{CDCl}_3$ ) ( $\delta$ , ppm): 201.48, 155.72, 152.29, 149.93, 145.59, 137.03, 135.28, 132.96, 129.78, 122.57, 118.48, 115.68, 111.62, 39.82, 28.04. ESI-MS ( $m/z$ ): 323.1  $[\text{M}+\text{H}]^+$ , 325.1  $[(\text{M}+2)+\text{H}]^+$ .

## **2.2. General procedure for the synthesis of *N*-substituted ethyl 4-oxo-1,4-dihydroquinoline-2-carboxylate (4a-j) (Representative example 4a)**

To the solution of LiHMDS (1M solution in THF) (10 mL, 10 mmol, 2.5 eq), kept at -60 °C, was added a solution of secondary amine (**3a-d, f-j**) (1.0 g, 4.1 mmol, 1.0 eq) in THF (20 ml) and the reaction mixture was stirred for 30 min. Then a solution of diethyl oxalate (1.5 g, 10 mmol, 2.5 eq) in THF (5mL) was added drop wise over a period of 20 min at -60 °C. The reaction mixture was then refluxed for 16 hr. The reaction was cooled and quenched with saturated solution of

NH<sub>4</sub>Cl (50 mL) and the compound was extracted with ethyl acetate (3×20 mL). The combined organic layers were washed with brine, dried over anhyd. sodium sulphate and concentrated under *vacuo*. The crude product was purified by column chromatography eluted with ethyl acetate: hexane (4:6) to yield pure product.

**Ethyl 1-((1-ethyl-1*H*-pyrazol-4-yl)methyl)-4-oxo-1,4-dihydroquinoline-2-carboxylate (4a)**

Light brown solid, yield: 45%, R<sub>f</sub> = 0.44 (Ethyl acetate/ hexane, 40:60), mp 87-89 °C. <sup>1</sup>H NMR (400 MHz, DMSO-*d*<sub>6</sub>) (δ, ppm): 8.17 (d, *J* = 7.8 Hz, 1H), 7.93 (d, *J* = 8.8 Hz, 1H), 7.76 (t, *J* = 7.8 Hz, 1H), 7.68 (s, 1H), 7.44-7.40 (m, 2H), 6.39 (s, 1H), 5.36 (s, 2H), 4.41 (q, *J* = 7.1 Hz, 2H), 4.04 (q, *J* = 7.2 Hz, 2H), 1.31-1.23 (m, 6H). <sup>13</sup>C NMR (75 MHz, CDCl<sub>3</sub>) (δ, ppm): 179.02, 164.26, 153.78, 144.47, 140.25, 135.38, 129.98, 127.61, 126.89, 118.04, 116.94, 114.55, 112.10, 63.28, 53.58, 43.28, 14.45, 13.82. ESI-MS (*m/z*): 326.1 [M+H]<sup>+</sup>.

**Ethyl 1-((1-(4-methoxyphenyl)-3-(pyridin-4-yl)-1*H*-pyrazol-4-yl)methyl)-4-oxo-1,4-dihydroquinoline-2-carboxylate (4b)**

Yellow solid, yield: 44%, R<sub>f</sub> = 0.30 (Ethyl acetate/ hexane, 40:60), mp 164-166 °C, <sup>1</sup>H NMR (400 MHz, DMSO-*d*<sub>6</sub>) (δ, ppm): 8.94 (s, 1H), 8.62 (s, 1H), 8.19-8.12 (m, 3H), 7.73-7.66 (m, 4H), 7.52-7.49 (m, 1H), 7.41 (m, 1H), 6.99 (d, *J* = 8.9 Hz, 2H), 6.44 (s, 1H), 5.67 (s, 2H), 4.20-4.19 (m, 2H), 3.76 (s, 3H), 1.09 (t, *J* = 7.1 Hz, 3H). <sup>13</sup>C NMR (75 MHz, CDCl<sub>3</sub>) (δ, ppm): 178.10, 163.66, 158.71, 149.14, 148.38, 146.47, 143.65, 141.05, 135.46, 133.34, 133.10, 128.98, 127.72, 127.38, 126.89, 124.45, 123.89, 120.73, 117.04, 116.57, 114.55, 113.10, 63.14, 55.58, 45.28, 13.93. ESI-MS (*m/z*): 481.0 [M+H]<sup>+</sup>.

**Ethyl 1-((1,3-diphenyl-1*H*-pyrazol-4-yl)methyl)-4-oxo-1,4-dihydroquinoline-2-carboxylate (4c)**

Off-white solid, yield: 69%, R<sub>f</sub> = 0.54 (Ethyl acetate/ hexane, 40:60), mp 150-152 °C, <sup>1</sup>H NMR (400 MHz, DMSO-*d*<sub>6</sub>) (δ, ppm): 8.20-8.18 (m, 2H), 7.82-7.76 (m, 4H), 7.71-7.67 (m, 1H),

7.62-7.60 (m, 1H), 7.52-7.48 (m, 2H), 7.46-7.39 (m, 4H), 7.29-7.25 (m, 1H), 6.45 (s, 1H), 5.64 (s, 2H), 4.19 (q,  $J = 7.1$  Hz, 2H), 1.09 (t,  $J = 7.0$  Hz, 3H).  $^{13}\text{C}$  NMR (75 MHz,  $\text{CDCl}_3$ ) ( $\delta$ , ppm): 178.10, 163.78, 150.42, 143.92, 141.01, 139.59, 133.22, 132.51, 129.40, 128.96, 128.62, 128.03, 127.36, 126.78, 124.35, 118.97, 116.93, 116.82, 112.78, 63.11, 45.52, 13.94. ESI-MS ( $m/z$ ): 450.6  $[\text{M}+\text{H}]^+$ .

**Ethyl 1-((5-bromopyridin-2-yl)methyl)-4-oxo-1,4-dihydroquinoline-2-carboxylate (4d)**

Brown solid, yield: 69%,  $R_f = 0.54$  (Ethyl acetate/ hexane, 40:60), mp 140-142 °C,  $^1\text{H}$  NMR (400 MHz,  $\text{DMSO}-d_6$ ) ( $\delta$ , ppm): 8.63 (s, 1H), 8.40 (s, 1H), 8.21 (d,  $J = 7.2$  Hz, 1H), 7.85 (s, 1H), 7.72 (t,  $J = 7.3$  Hz, 1H), 7.58 (d,  $J = 8.6$  Hz, 1H), 7.44 (t,  $J = 7.3$  Hz, 1H), 6.54 (s, 1H), 5.61 (s, 2H), 4.31 (q,  $J = 7.0$  Hz, 2H), 1.17 (t,  $J = 7.1$  Hz, 3H).  $^{13}\text{C}$  NMR (75 MHz,  $\text{CDCl}_3$ ) ( $\delta$ , ppm): 180.10, 164.58, 154.78, 150.42, 145.29, 143.81, 135.69, 132.76, 130.51, 128.66, 120.35, 117.97, 116.93, 114.82, 112.78, 63.11, 54.52, 13.90. ESI-MS ( $m/z$ ): 388.46  $[\text{M}+\text{H}]^+$ .

**Ethyl 1-(4-(1H-pyrazol-1-yl)benzyl)-4-oxo-1,4-dihydroquinoline-2-carboxylate (4f)**

Creamish solid, yield: 69%,  $R_f = 0.44$  (Ethyl acetate/ hexane, 40:60), mp 214-216 °C,  $^1\text{H}$  NMR (300 MHz,  $\text{CDCl}_3$ ) ( $\delta$ , ppm): 8.64 (s, 1H), 8.56 (d,  $J = 7.8$  Hz, 1H), 7.90 (s, 1H), 7.71 (d,  $J = 8.4$  Hz, 3H), 7.56 (t,  $J = 7.1$  Hz, 1H), 7.41 (t,  $J = 7.5$  Hz, 1H), 7.32-7.25 (m, 3H), 6.47 (s, 1H), 5.43 (s, 2H), 4.42 (q,  $J = 7.1$  Hz, 2H), 1.43 (t,  $J = 7.1$  Hz, 3H).  $^{13}\text{C}$  NMR (75 MHz,  $\text{CDCl}_3$ ) ( $\delta$ , ppm): 174.42, 165.67, 149.65, 141.45, 140.27, 139.00, 132.65, 132.28, 129.26, 127.95, 127.29, 126.69, 125.27, 119.82, 116.49, 111.35, 108.05, 60.99, 56.93, 14.46. ESI-MS ( $m/z$ ): 374.5  $[\text{M}+\text{H}]^+$ .

**Ethyl 1-(4-(trifluoromethyl)benzyl)-4-oxo-1,4-dihydroquinoline-2-carboxylate (4g)**

Brown solid, yield: 53%,  $R_f = 0.34$  (Ethyl acetate/ hexane, 40:60), mp 108-110 °C,  $^1\text{H}$  NMR (300 MHz,  $\text{CDCl}_3$ ) ( $\delta$ , ppm): 8.44 (d,  $J = 8.1$  Hz, 1H), 7.68-7.55 (m, 3H), 7.39 (t,  $J = 7.5$  Hz, 1H), 7.29 (d,  $J = 9.0$  Hz, 3H), 6.80 (s, 1H), 5.57 (s, 2H), 4.34 (q,  $J = 7.1$  Hz, 2H), 1.29 (t,  $J = 7.2$



Hz, 3H). <sup>13</sup>C NMR (75 MHz, CDCl<sub>3</sub>) (δ, ppm): 178.18, 163.51, 143.86, 141.31, 140.17, 133.40, 130.37, 127.38, 126.93, 126.23, 126.03, 125.68, 124.51, 116.76, 113.33, 63.13, 52.62, 13.83. ESI-MS (*m/z*): 374.2 [M-H]<sup>-</sup>, 376.3 [M+H]<sup>+</sup>.

**Ethyl 1-(4-(trifluoromethoxy)benzyl)-4-oxo-1,4-dihydroquinoline-2-carboxylate (4h)**

Light Yellow solid, yield: 59%, R<sub>f</sub> = 0.54 (Ethyl acetate/ hexane, 40:60), mp 76-78 °C, <sup>1</sup>H NMR (300 MHz, CDCl<sub>3</sub>) (δ, ppm): 8.44 (d, *J* = 8.1 Hz, 1H), 7.59 (t, *J* = 7.8 Hz, 1H), 7.42-7.33 (m, 2H), 7.26-7.19 (m, 4H), 6.77 (s, 1H), 5.52 (s, 2H), 4.40-4.31 (m, 2H), 1.28 (t, *J* = 7.1 Hz, 3H). <sup>13</sup>C NMR (75 MHz, CDCl<sub>3</sub>) (δ, ppm): 179.23, 164.21, 158.81, 154.26, 144.86, 135.47, 133.26, 130.62, 128.76, 127.23, 122.51, 118.97, 116.76, 115.34, 114.89, 64.13, 51.62, 14.21. ESI-MS (*m/z*): 392.1 [M+H]<sup>+</sup>.

**Ethyl 1-(furan-2-ylmethyl)-4-oxo-1,4-dihydroquinoline-2-carboxylate (4i)**

Brown solid, yield: 53%, R<sub>f</sub> = 0.34 (Ethyl acetate/ hexane, 40:60), mp 71-73 °C, <sup>1</sup>H NMR (300 MHz, CDCl<sub>3</sub>) (δ, ppm): 8.43 (d, *J* = 7.8 Hz, 1H), 7.71-7.69 (m, 2H), 7.49-7.35 (m, 2H), 6.73 (s, 1H), 6.31-6.27 (m, 2H), 5.58 (s, 2H), 4.44 (q, *J* = 7.2 Hz, 2H), 1.40 (t, *J* = 7.0 Hz, 3H). <sup>13</sup>C NMR (75 MHz, CDCl<sub>3</sub>) (δ, ppm): 178.13, 163.78, 149.05, 143.36, 142.61, 141.28, 133.09, 127.39, 126.81, 124.28, 116.48, 113.40, 110.71, 109.00, 62.99, 44.78, 13.97. ESI-MS (*m/z*): 302.1.

**Ethyl 1-((2-bromo-3-fluoropyridin-4-yl)methyl)-4-oxo-1,4-dihydroquinoline-2-carboxylate (4j)**

Light brown, yield: 54%, R<sub>f</sub> = 0.34 (Ethyl acetate/ hexane, 40:60), mp 210-212 °C, <sup>1</sup>H NMR (300 MHz, CDCl<sub>3</sub>) (δ, ppm): 8.44 (d, *J* = 8.1 Hz, 1H), 8.10 (d, *J* = 4.8 Hz, 1H), 7.65 (t, *J* = 7.9 Hz, 1H), 7.43 (t, *J* = 7.5 Hz, 1H), 7.19 (d, *J* = 8.7 Hz, 1H), 6.89-6.83 (m, 2H), 5.57 (s, 2H), 4.38 (q, *J* = 7.1 Hz, 2H), 1.35 (t, *J* = 7.1 Hz, 3H). <sup>13</sup>C NMR (75 MHz, CDCl<sub>3</sub>) (δ, ppm): 178.17,

163.23, 154.63, 151.20, 145.81, 142.97, 141.16, 134.38, 133.84, 130.11, 127.29, 124.86, 121.93, 115.95, 114.36, 63.36, 47.02, 13.88. ESI-MS (*m/z*): 403.1 [M-H]<sup>-</sup>, 405.2 [M+H]<sup>+</sup>.

**General procedure for the hydrolysis of *N*-substituted ethyl 4-oxo-1,4-dihydroquinoline-2-carboxylate (5a-j) (Representative hydrolysis of 4a)**

The compound **4a** (0.2 g, 0.61 mmol, 1.0 eq) was dissolved in THF (6 mL) and water (2 mL) mixture. To this solution LiOH.H<sub>2</sub>O (0.056 g, 1.35 mmol, 2.2 eq) was added and the reaction mixture was stirred for 4 hr at room temperature. After completion of the reaction, it was concentrated under *vacuo*. The residue was dissolved in water (50 mL) and acidified with 1N HCl up to pH-2~3. The compound was extracted with ethyl acetate (3×50 mL) and the combined organic layer was washed with brine (50 mL), dried over anhyd. sodium sulphate and concentrated under *vacuo* to afford 0.040 g (22 %) off white solid compound **5a**.<sup>4</sup>

**1-((1-ethyl-1*H*-pyrazol-4-yl)methyl)-4-oxo-1,4-dihydroquinoline-2-carboxylic acid (5a)**

Light yellow solid, yield: 22%, *R*<sub>f</sub> = 0.44 (Methanol/ DCM, 10:90), mp 182-184 °C, <sup>1</sup>H NMR (300 MHz, DMSO-*d*<sub>6</sub>) ( $\delta$ , ppm): 8.17 (d, *J* = 7.5 Hz, 1H), 7.94 (d, *J* = 8.4 Hz, 1H), 7.77-7.69 (m, 2H), 7.42 (m, 2H), 6.34 (s, 1H), 5.43 (s, 2H), 4.05-4.00 (m, 2H), 1.28 (t, *J* = 6.6 Hz, 3H). <sup>13</sup>C NMR (75 MHz, DMSO-*d*<sub>6</sub>) ( $\delta$ , ppm): 180.14, 165.47, 152.39, 143.51, 140.27, 135.78, 131.28, 128.56, 125.72, 119.45, 117.95, 113.42, 112.54, 54.76, 43.34, 14.78. ESI-MS (*m/z*): 298.2 [M+H]<sup>+</sup>.

**1-((1-(4-methoxyphenyl)-3-(pyridin-4-yl)-1*H*-pyrazol-4-yl)methyl)-4-oxo-1,4-dihydroquinoline-2-carboxylic acid (5b)**

Yellow solid, yield: 63%, *R*<sub>f</sub> = 0.1 (Methanol/ DCM, 10:90), mp 164-166 °C, <sup>1</sup>H NMR (300 MHz, DMSO-*d*<sub>6</sub>) ( $\delta$ , ppm): 8.98 (s, 1H), 8.65 (s, 1H), 8.19-8.16 (m, 2H), 8.06 (s, 1H), 7.76-7.52 (m, 5H), 7.38 (t, *J* = 7.4 Hz, 1H), 6.98 (d, *J* = 9.0 Hz, 2H), 6.40 (s, 1H), 5.72 (s, 2H), 3.76 (s, 3H). <sup>13</sup>C NMR (75 MHz, DMSO-*d*<sub>6</sub>) ( $\delta$ , ppm): 177.14, 165.39, 158.29, 149.39, 148.58, 146.52,

144.51, 141.19, 135.51, 133.23, 129.06, 128.34, 127.19, 125.96, 124.25, 120.38, 118.45, 114.95, 110.54, 55.86, 43.16. ESI-MS ( $m/z$ ): 451.4 [M-H]<sup>-</sup>, 453.3 [M+H]<sup>+</sup>.

**1-((1,3-diphenyl-1*H*-pyrazol-4-yl)methyl)-4-oxo-1,4-dihydroquinoline-2-carboxylic acid (5c)**

Light brown solid, yield: 74%,  $R_f$  = 0.44 (Methanol/ DCM, 10:90), mp 177-179 °C, <sup>1</sup>H NMR (300 MHz, DMSO- $d_6$ ) ( $\delta$ , ppm): 8.19 (d,  $J$  = 8.4 Hz, 2H), 8.12 (s, 1H), 7.80-7.74 (m, 2H), 7.63 (t,  $J$  = 7.3 Hz, 2H), 7.55-7.36 (m, 7H), 7.27 (t,  $J$  = 7.2 Hz, 1H), 6.43 (s, 1H), 5.69 (s, 2H). <sup>13</sup>C NMR (75 MHz, DMSO- $d_6$ ) ( $\delta$ , ppm): 178.54, 164.49, 152.29, 150.39, 145.26, 140.19, 135.23, 133.27, 130.72, 129.42, 128.46, 127.36, 126.64, 125.96, 123.78, 120.67, 118.45, 117.56, 114.95, 112.96, 42.16. ESI-MS ( $m/z$ ): 420.5 [M-H]<sup>-</sup>, 422.5 [M+H]<sup>+</sup>.

**1-((5-bromopyridin-2-yl)methyl)-4-oxo-1,4-dihydroquinoline-2-carboxylic acid (5d)**

Light brown solid, yield: 74%,  $R_f$  = 0.44 (Methanol/ DCM, 10:90), mp 171-173 °C, <sup>1</sup>H NMR (400 MHz, DMSO- $d_6$ ) ( $\delta$ , ppm): 8.62 (s, 1H), 8.41 (s, 1H), 8.20 (d,  $J$  = 7.9 Hz, 1H), 7.87 (s, 1H), 7.69 (t,  $J$  = 7.9 Hz, 1H), 7.59 (d,  $J$  = 8.7 Hz, 1H), 7.42 (t,  $J$  = 7.4 Hz, 1H), 6.49 (s, 1H), 5.64 (s, 2H). <sup>13</sup>C NMR (75 MHz, DMSO- $d_6$ ) ( $\delta$ , ppm): 177.04, 165.20, 149.71, 147.02, 146.76, 140.94, 137.13, 135.37, 133.75, 127.14, 126.17, 124.74, 120.58, 118.16, 110.90, 50.19. ESI-MS ( $m/z$ ): 357.1 [M-H]<sup>-</sup>, 361.2 [(M+2)+H]<sup>+</sup>.

**1-(4-(1*H*-pyrazol-1-yl)benzyl)-4-oxo-1,4-dihydroquinoline-2-carboxylic acid (5f)**

Off-white solid, yield: 64%,  $R_f$  = 0.34 (Methanol/ DCM, 40:60), mp 278-280 °C, <sup>1</sup>H NMR (300 MHz, DMSO- $d_6$ ) ( $\delta$ , ppm): 15.14 (s, 1H), 9.32 (s, 1H), 8.44-8.39 (m, 2H), 7.89-7.81 (m, 4H), 7.72 (s, 1H), 7.62 (t,  $J$  = 6.9 Hz, 1H), 7.44 (d,  $J$  = 7.8 Hz, 2H), 6.52 (s, 1H), 5.91 (s, 2H). <sup>13</sup>C NMR (75 MHz, DMSO- $d_6$ ) ( $\delta$ , ppm): 178.48, 166.50, 150.68, 141.58, 139.91, 139.84,

134.63, 133.59, 128.49, 128.23, 126.82, 126.45, 126.26, 119.27, 119.08, 108.42, 56.46. ESI-MS ( $m/z$ ): 346.2 [M+H]<sup>+</sup>.

**1-(4-(trifluoromethyl)benzyl)-4-oxo-1,4-dihydroquinoline-2-carboxylic acid (5g)**

Off-white solid, yield: 86%,  $R_f = 0.44$  (Methanol/ DCM, 10:90), mp 210-212 °C. <sup>1</sup>H NMR (300 MHz, DMSO) ( $\delta$ , ppm): 8.24 (m, 1H, Ar-H), 7.72-7.42 (m, 6H, Ar-H), 6.50 (s, 1H, Ar-H), 5.75 (s, 2H, CH<sub>2</sub>). <sup>13</sup>C NMR (75 MHz, CDCl<sub>3</sub>) ( $\delta$ , ppm): 176.96, 165.28, 147.61, 142.12, 140.97, 133.55, 128.18, 127.54, 127.40, 126.09, 124.62, 118.29, 110.39, 52.18. ESI-MS ( $m/z$ ): 348.2 [M+H]<sup>+</sup>.

**1-(4-(trifluoromethoxy)benzyl)-4-oxo-1,4-dihydroquinoline-2-carboxylic acid (5h)**

Off-white solid, yield: 63%,  $R_f = 0.1$  Methanol/ DCM, 10:90), mp 173-175 °C, <sup>1</sup>H NMR (300 MHz, DMSO-*d*<sub>6</sub>) ( $\delta$ , ppm): 8.29-8.27 (m, 1H), 7.75-7.65 (m, 3H), 7.48-7.39 (m, 4H), 6.55 (s, 1H), 5.74 (s, 2H). <sup>13</sup>C NMR (75 MHz, DMSO-*d*<sub>6</sub>) ( $\delta$ , ppm): 176.89, 165.31, 147.90, 147.44, 140.92, 136.59, 133.53, 128.57, 127.18, 126.07, 124.64, 121.72, 118.38, 110.32, 51.81. ESI-MS ( $m/z$ ): 364.2 [M+H]<sup>+</sup>.

**1-(furan-2-ylmethyl)-4-oxo-1,4-dihydroquinoline-2-carboxylic acid (5i)**

Off-white solid, yield: 88%,  $R_f = 0.44$  (Methanol/ DCM, 10:90), mp 179-180 °C, <sup>1</sup>H NMR (300 MHz, DMSO-*d*<sub>6</sub>) ( $\delta$ , ppm): 8.19 (d,  $J = 8.1$  Hz, 1H), 8.03 (d,  $J = 9.0$  Hz, 1H), 7.79 (t,  $J = 7.8$  Hz, 1H), 7.62-7.60 (m, 1H), 7.45 (t,  $J = 7.5$  Hz, 1H, Ar-), 6.46-6.41 (m, 3H), 5.76 (s, 2H). <sup>13</sup>C NMR (75 MHz, DMSO-*d*<sub>6</sub>) ( $\delta$ , ppm): 176.87, 165.44, 149.72, 146.49, 145.18, 143.59, 141.03, 133.44, 127.08, 125.98, 124.66, 118.26, 111.17, 109.64, 44.49. ESI-MS ( $m/z$ ): 270.2 [M+H]<sup>+</sup>.

**1-((2-bromo-3-fluoropyridin-4-yl)methyl)-4-oxo-1,4-dihydroquinoline-2-carboxylic acid (5j)**

Light yellow solid, yield: 81%,  $R_f = 0.1$  (Methanol/ DCM, 10:90), mp 173-175 °C,  $^1\text{H}$  NMR (300 MHz,  $\text{DMSO-}d_6$ ) ( $\delta$ , ppm): 8.22 (d,  $J = 7.8$  Hz, 1H), 8.12 (d,  $J = 4.8$  Hz, 1H), 7.74-7.54 (m, 2H), 7.44 (t,  $J = 7.5$  Hz, 1H), 6.92 (t,  $J = 5.1$  Hz, 1H), 6.53 (s, 1H), 5.75 (s, 2H).  $^{13}\text{C}$  NMR (75 MHz,  $\text{DMSO-}d_6$ ) ( $\delta$ , ppm): 177.28, 164.97, 147.35, 146.50, 141.32, 136.36, 136.18, 133.85, 129.24, 126.93, 126.13, 124.73, 123.23, 117.92, 111.35, 47.32. ESI-MS ( $m/z$ ): 377.2  $[\text{M}+\text{H}]^+$ .

### 3. References

1. A. F. Abdel-Magid, K. G. Carson, B. D. Harris, C. A. Maryanoff and R. D. Shah, *J. Org. Chem.*, 1996, **61**, 3849-3862.
2. R. F. Borch, M. D. Bernstein and H. D. Durst, *J. Am. Chem. Soc.*, 1971, **93**, 2897-2904.
3. R. Apodaca, and W. Xiao, *Org. Lett.*, 2001, **3**, 1745-1748.
4. B. Chen, H. F. Yin, Z. S. Wang, J. H. Xu, L. Q. Fan and J. Zhao, *Adv. Synth. Catal.*, 2009, **351**, 2959-2966.

#### 4. Spectroscopic data of representative compounds

##### 4.1. 1-(2-((1-(4-methoxyphenyl)-3-(pyridin-4-yl)-1H-pyrazol-4-yl)methyl)aminophenyl)ethanone (3b)

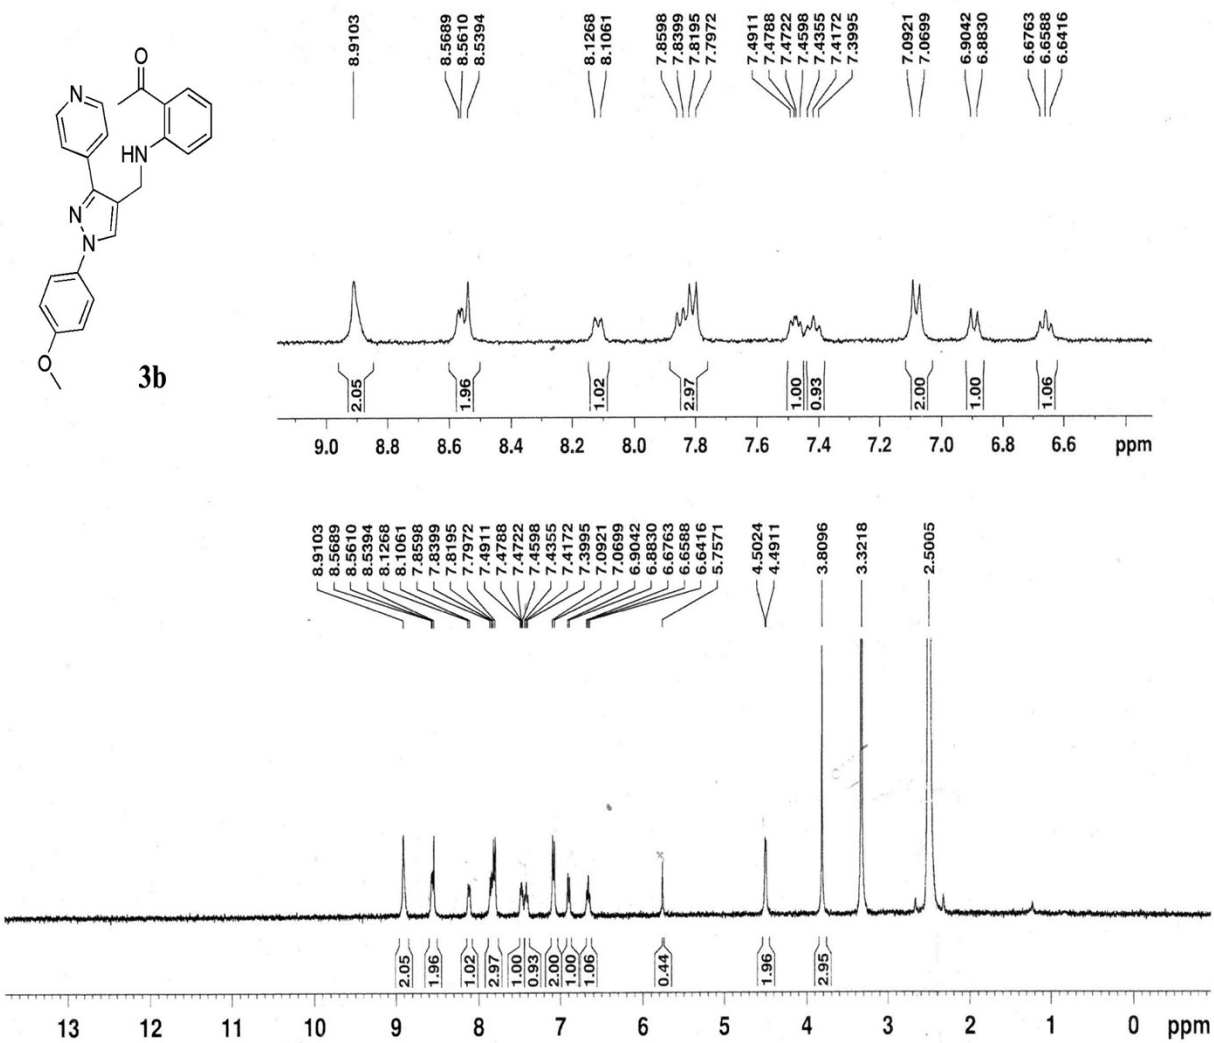

Fig. S1. <sup>1</sup>H NMR spectrum

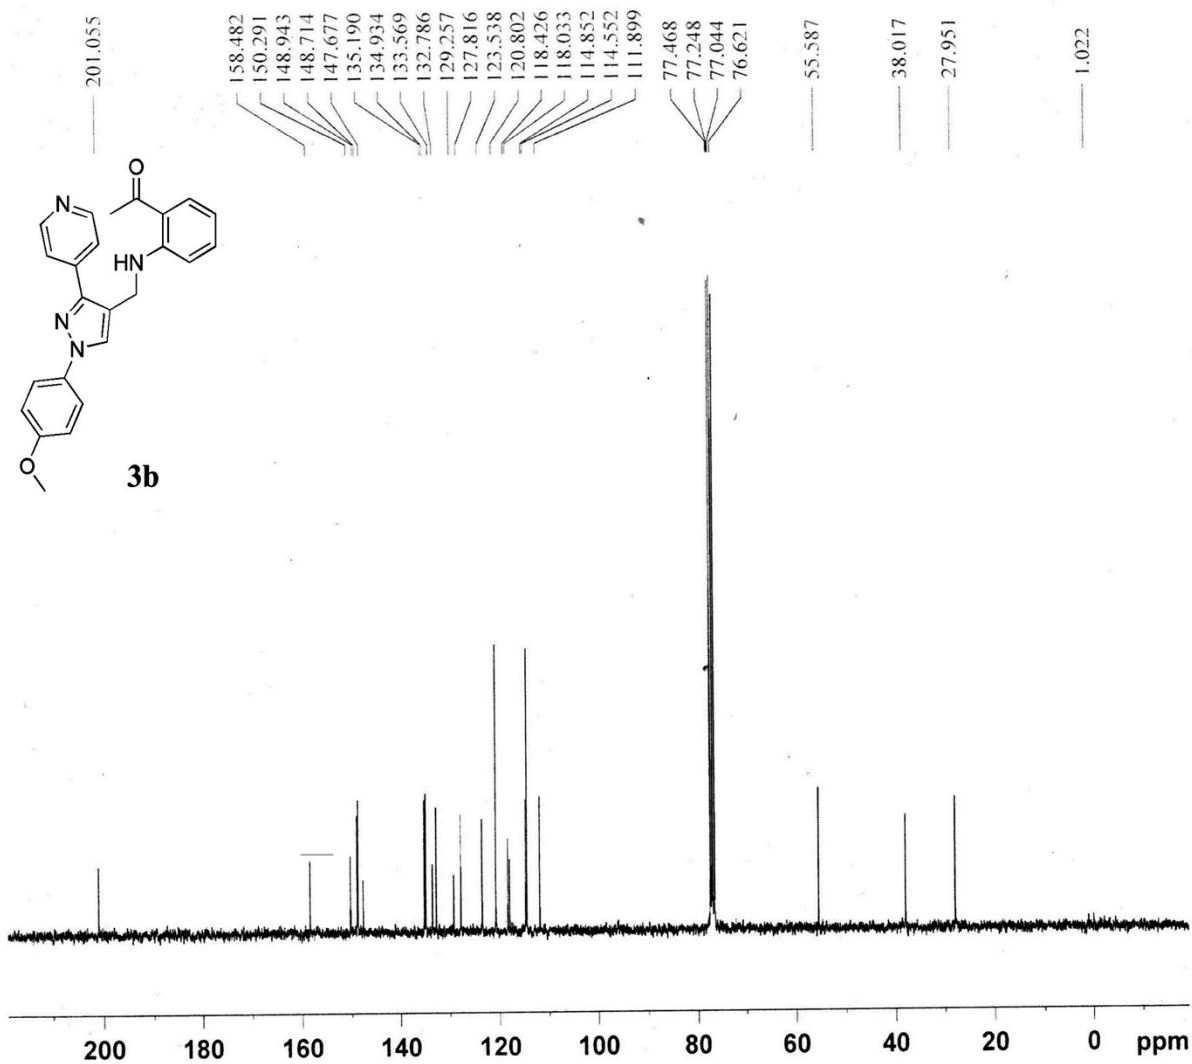

Fig. S2:  $^{13}\text{C}$  NMR spectrum

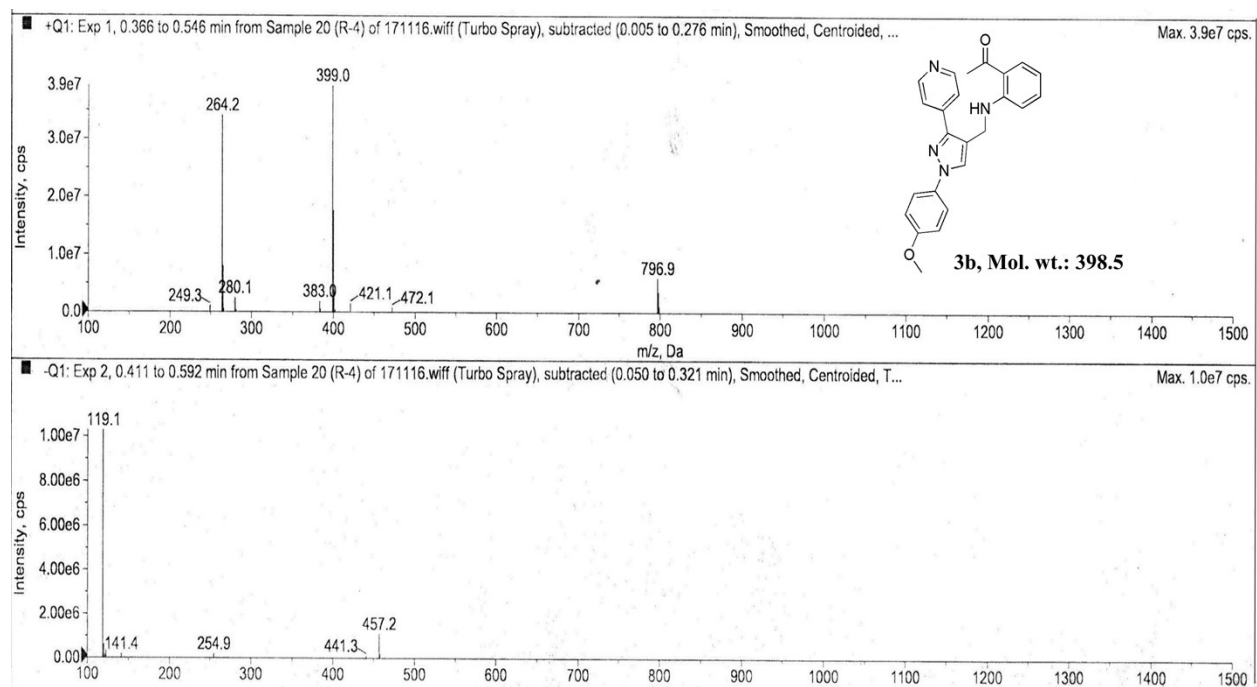

**Fig. S3: ESI-MS spectrum**



4.2. Ethyl 1-((1-(4-methoxyphenyl)-3-(pyridin-4-yl)-1H-pyrazol-4-yl)methyl)-4-oxo-1,4-dihydro quinoline -2-carboxylate (4b)

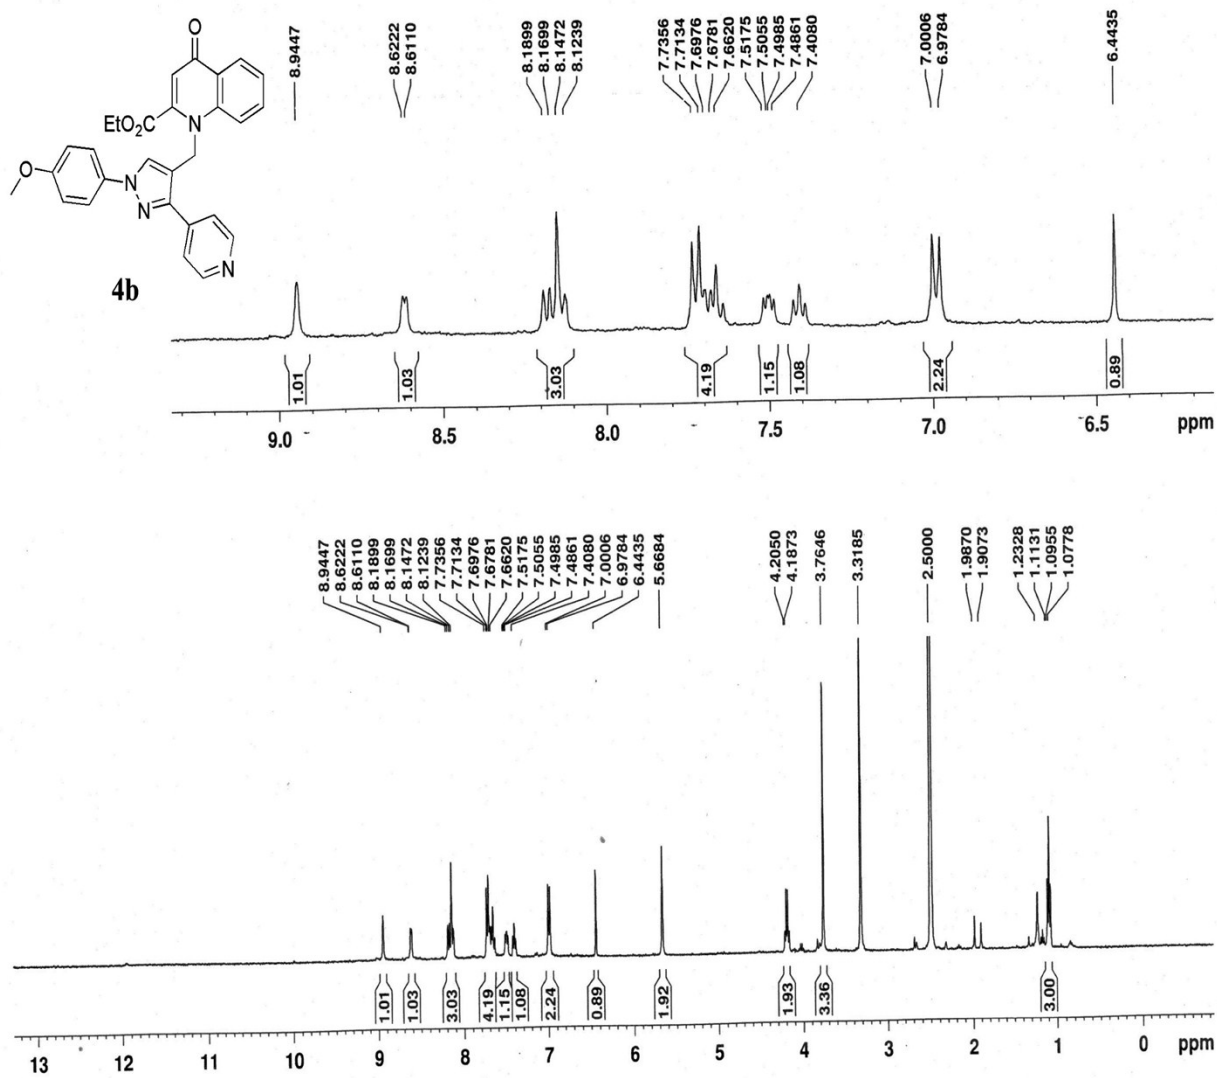

Fig. S4. <sup>1</sup>H NMR spectrum

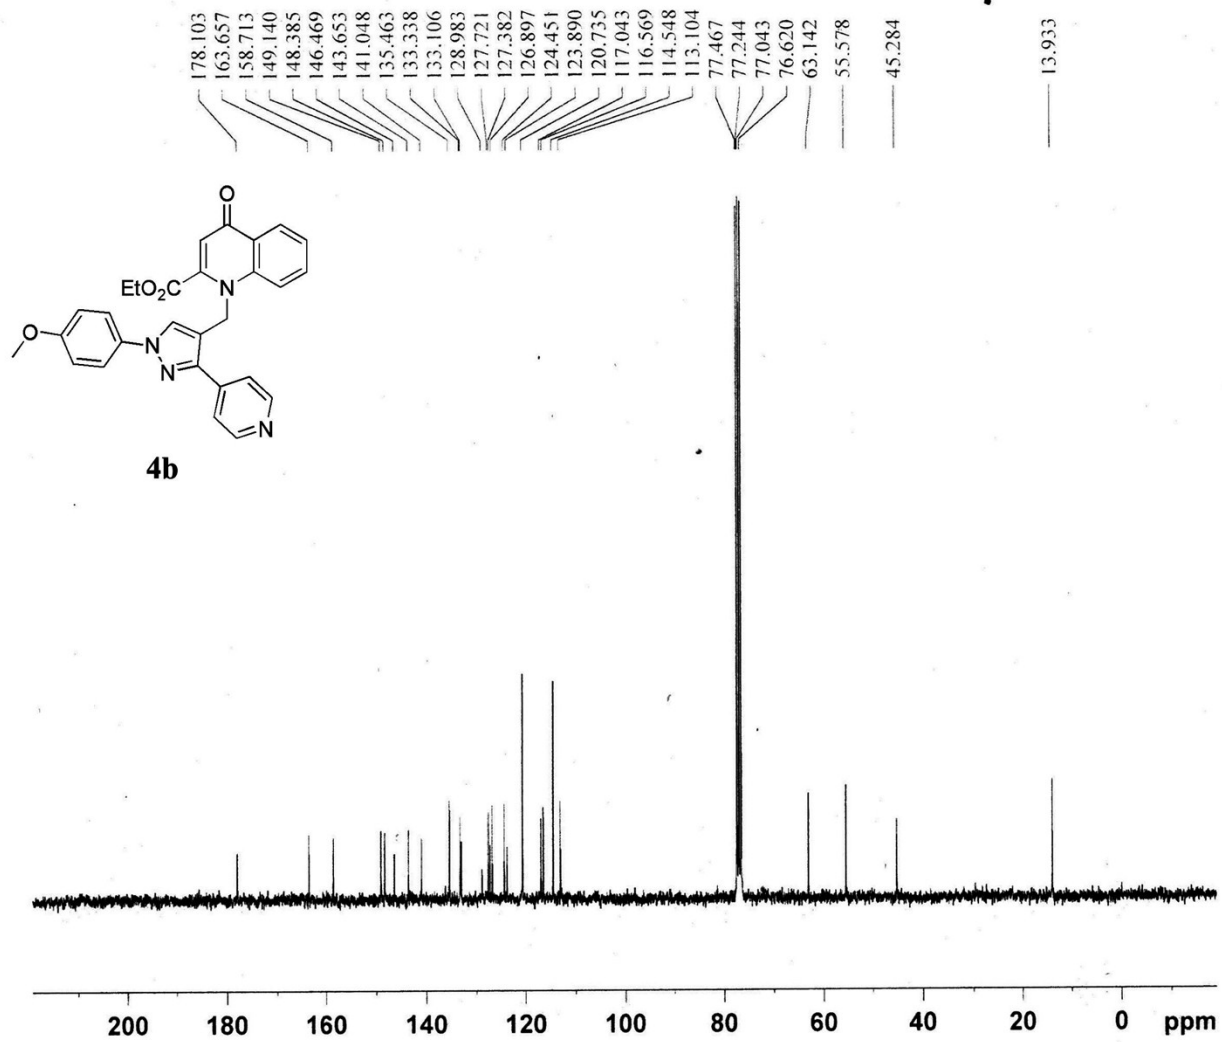

Fig. S5: <sup>13</sup>C NMR spectrum

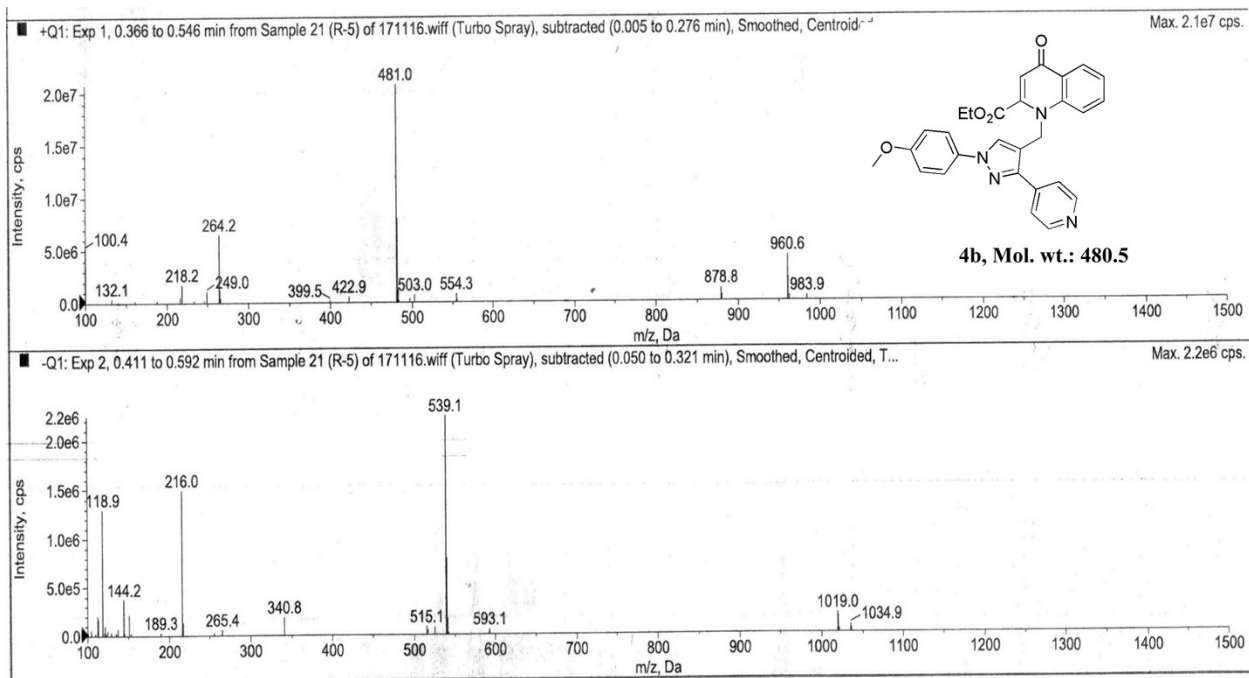

**Fig. S6: ESI-MS spectrum**

4.3. 1-((1-(4-methoxyphenyl)-3-(pyridin-4-yl)-1H-pyrazol-4-yl)methyl)-4-oxo-1,4-dihydroquinoline-2-carboxylic acid (5b)

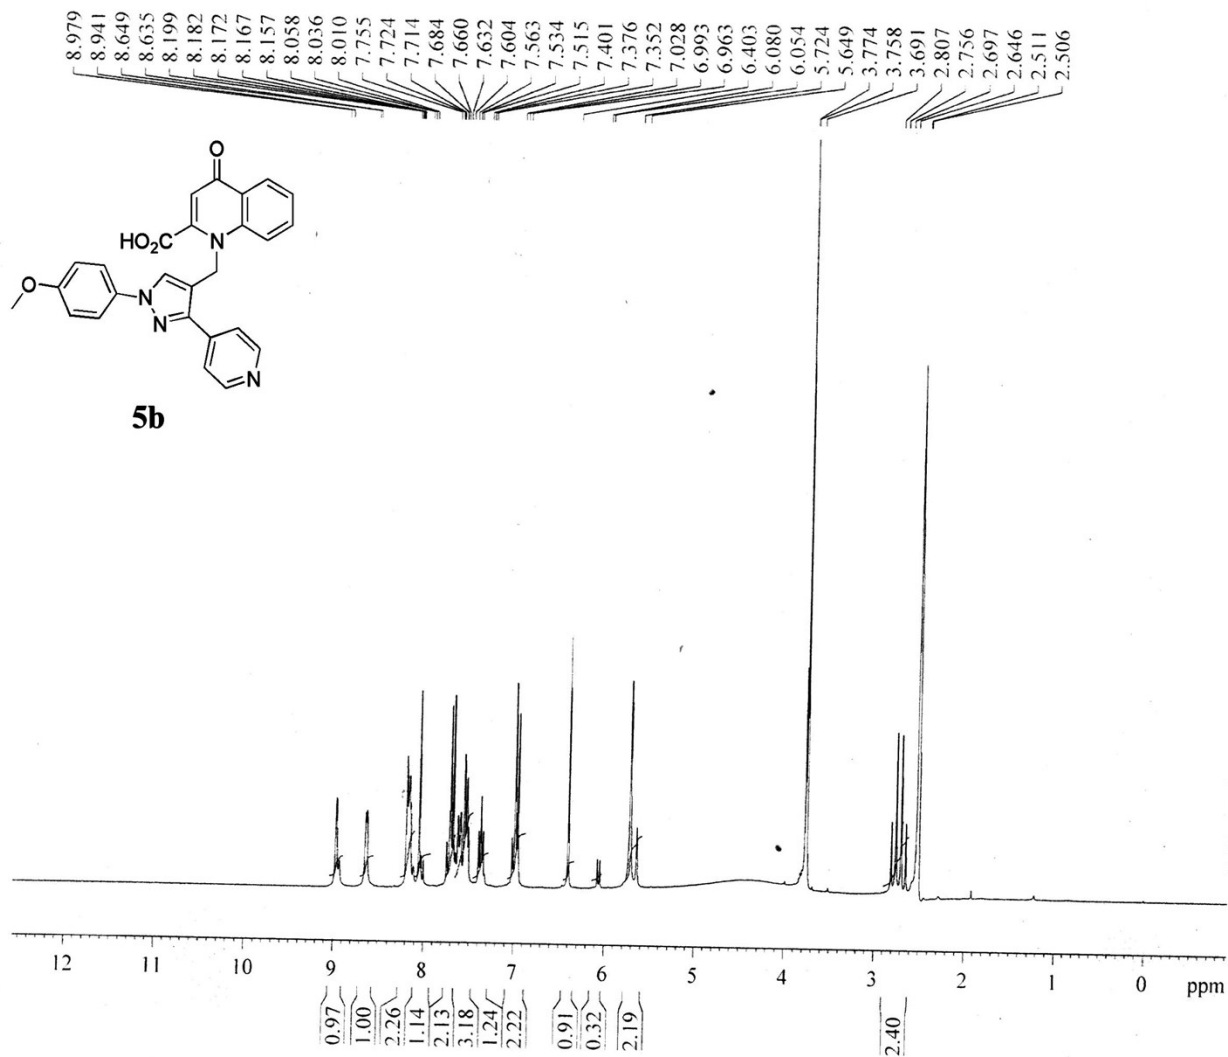

Fig. S7. <sup>1</sup>H NMR spectrum

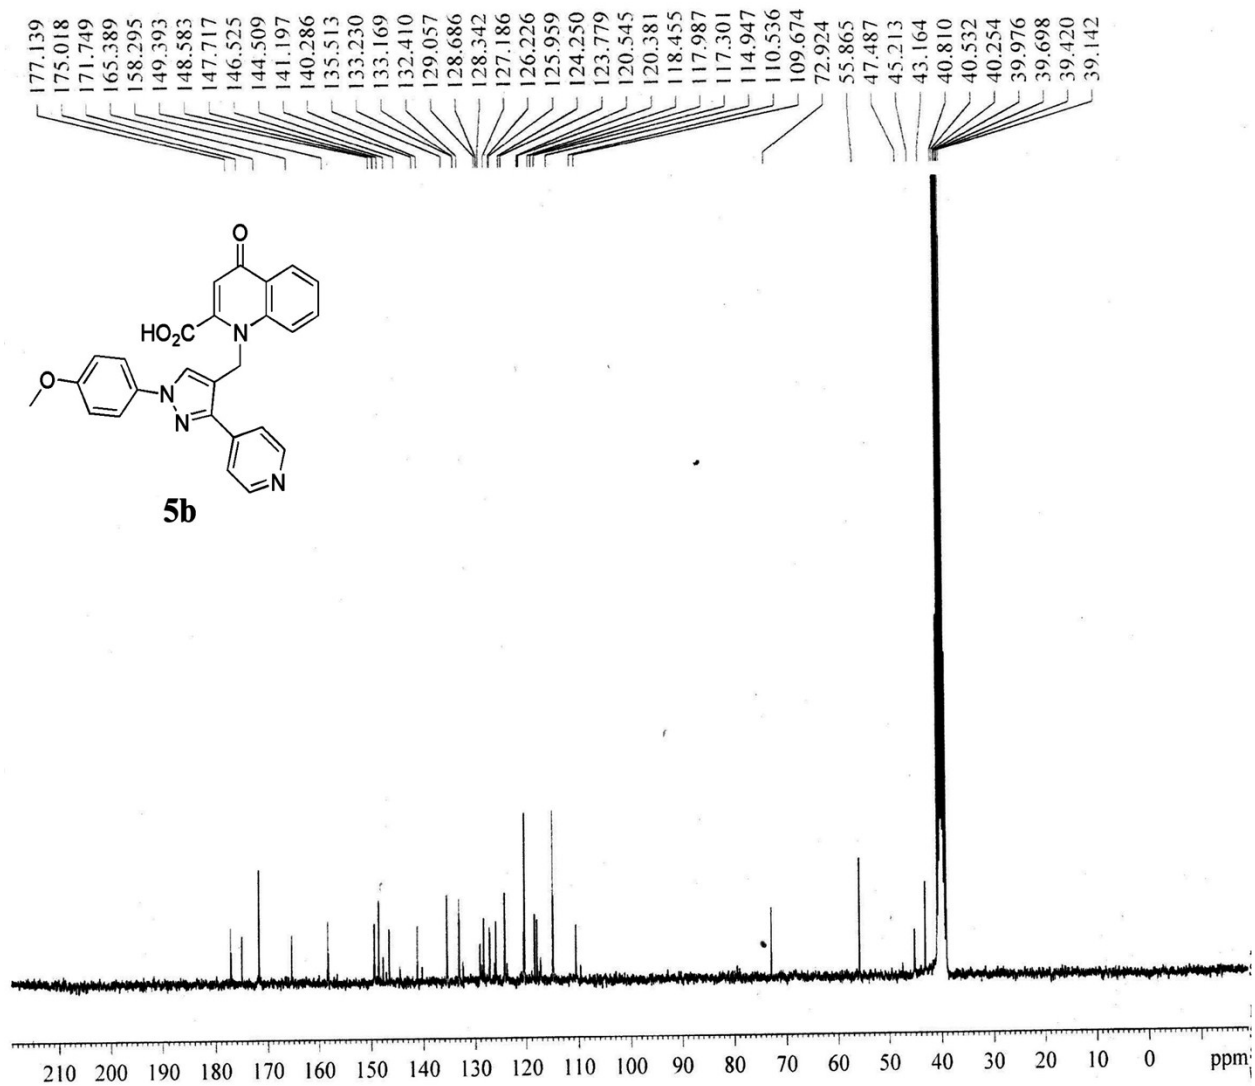

**Fig. S8.**  $^{13}\text{C}$  NMR spectrum

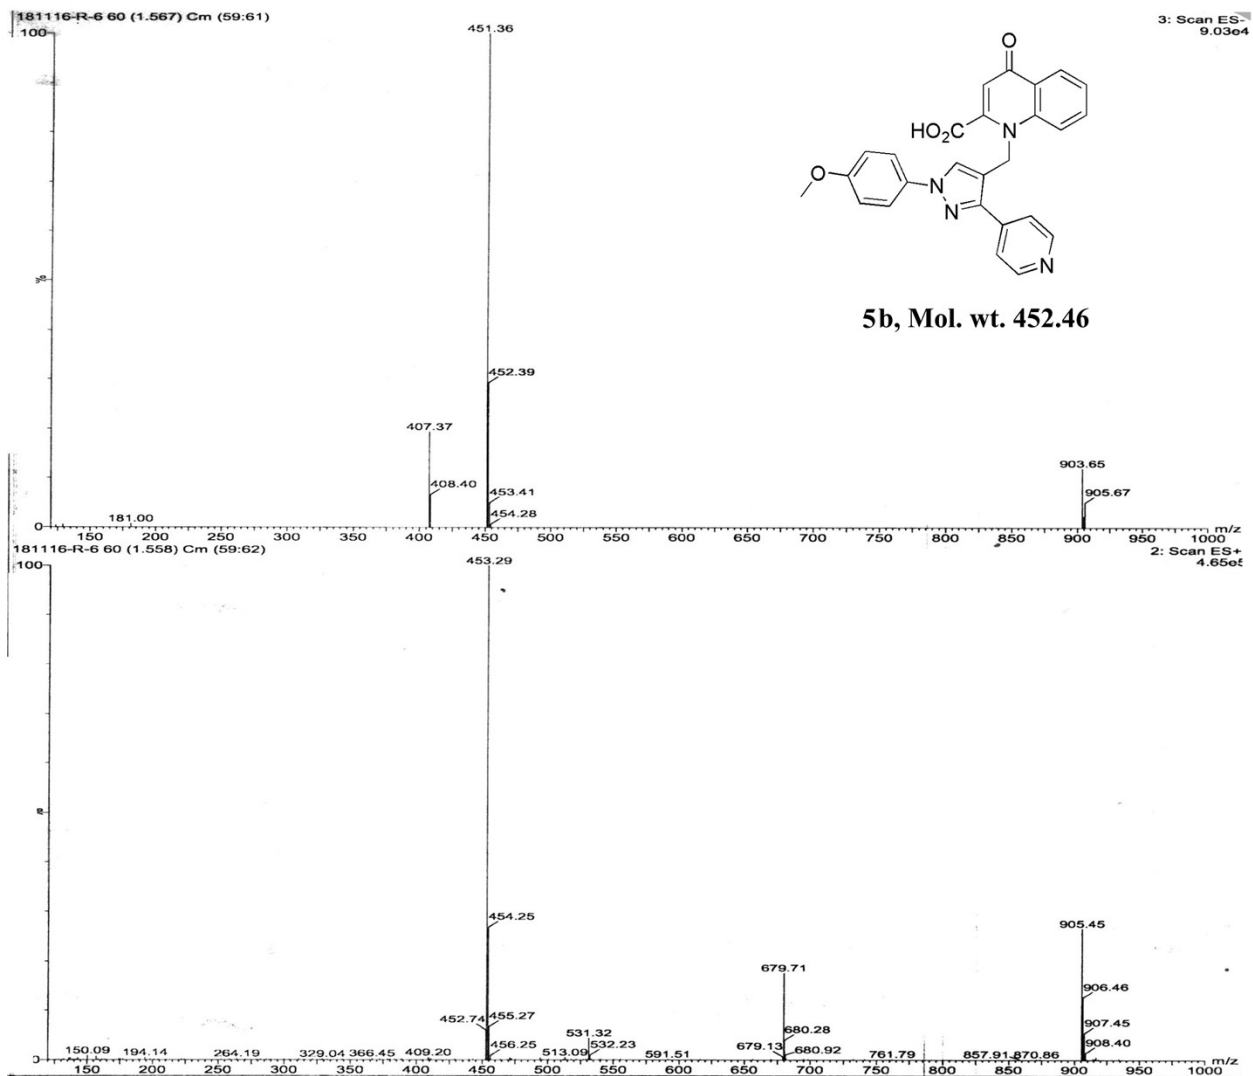

Fig. S9: ESI-MS spectrum

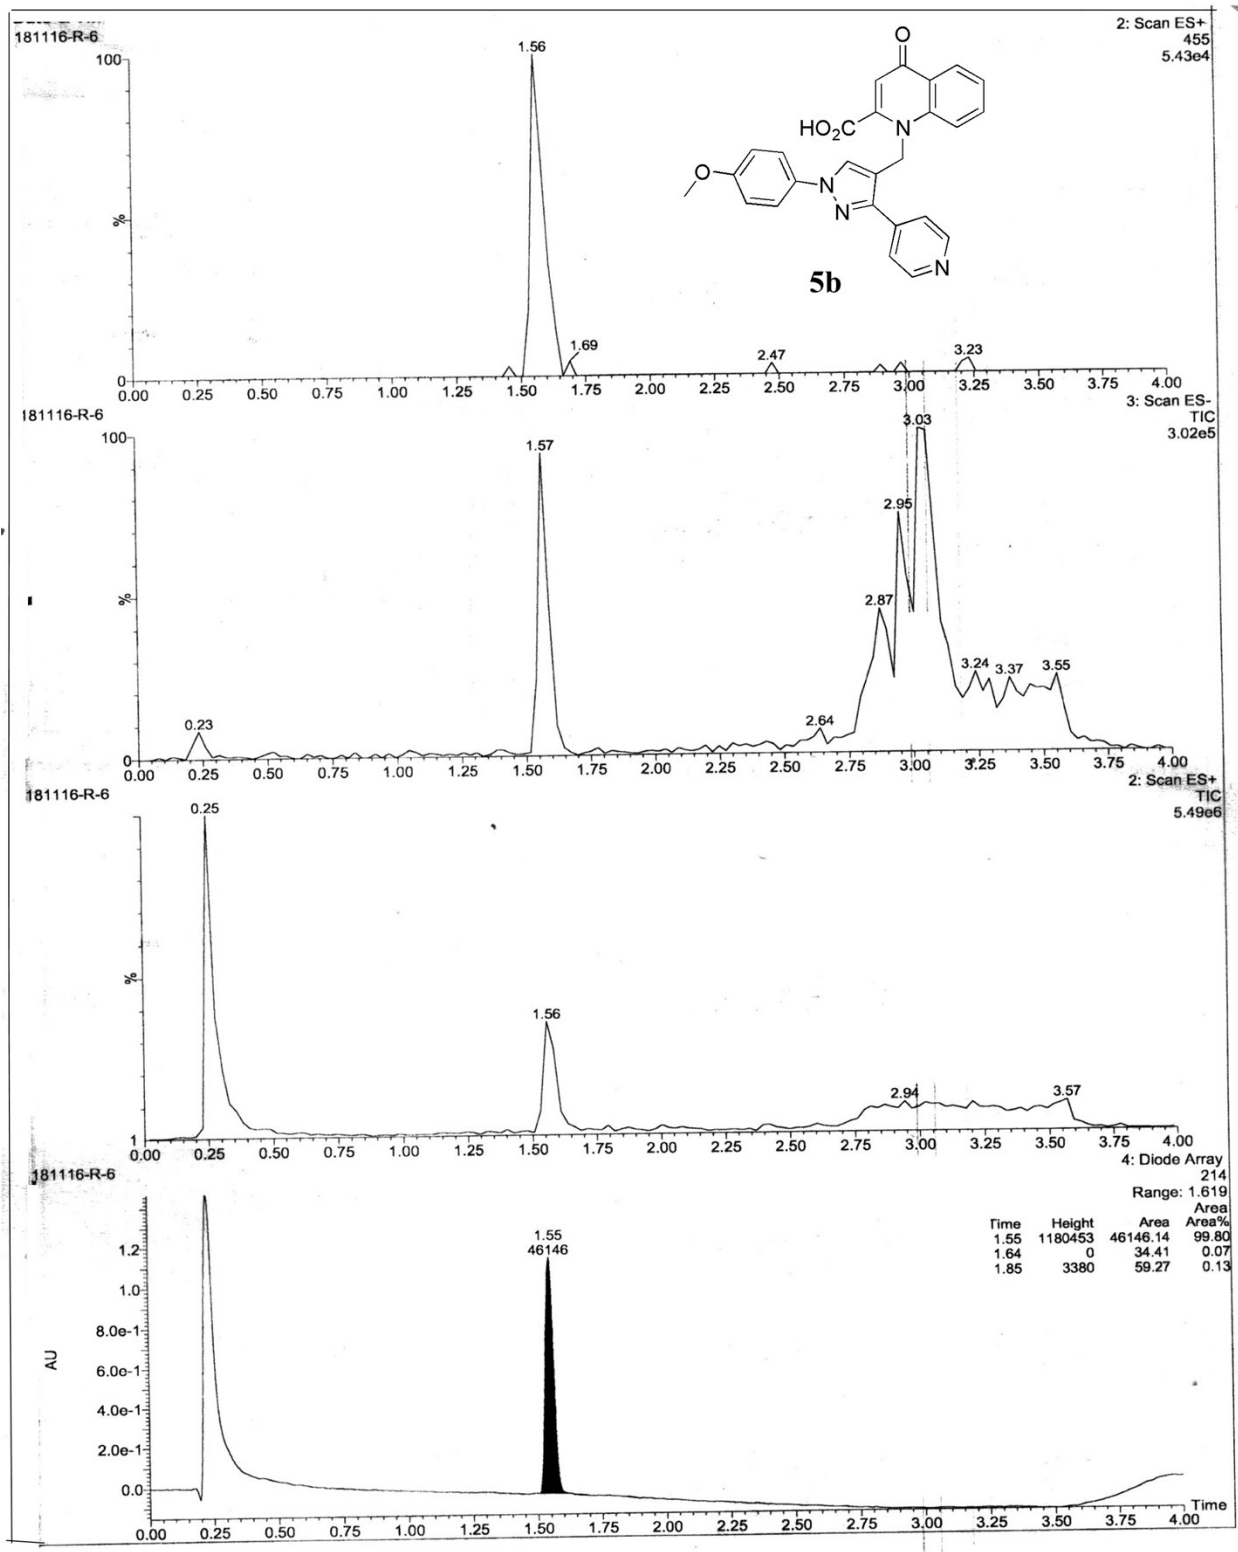

Fig. S10: HPLC spectrum

#### 4.4. 1-(2-(4-(1H-pyrazol-1-yl)benzylamino)phenyl)ethanone (3f)

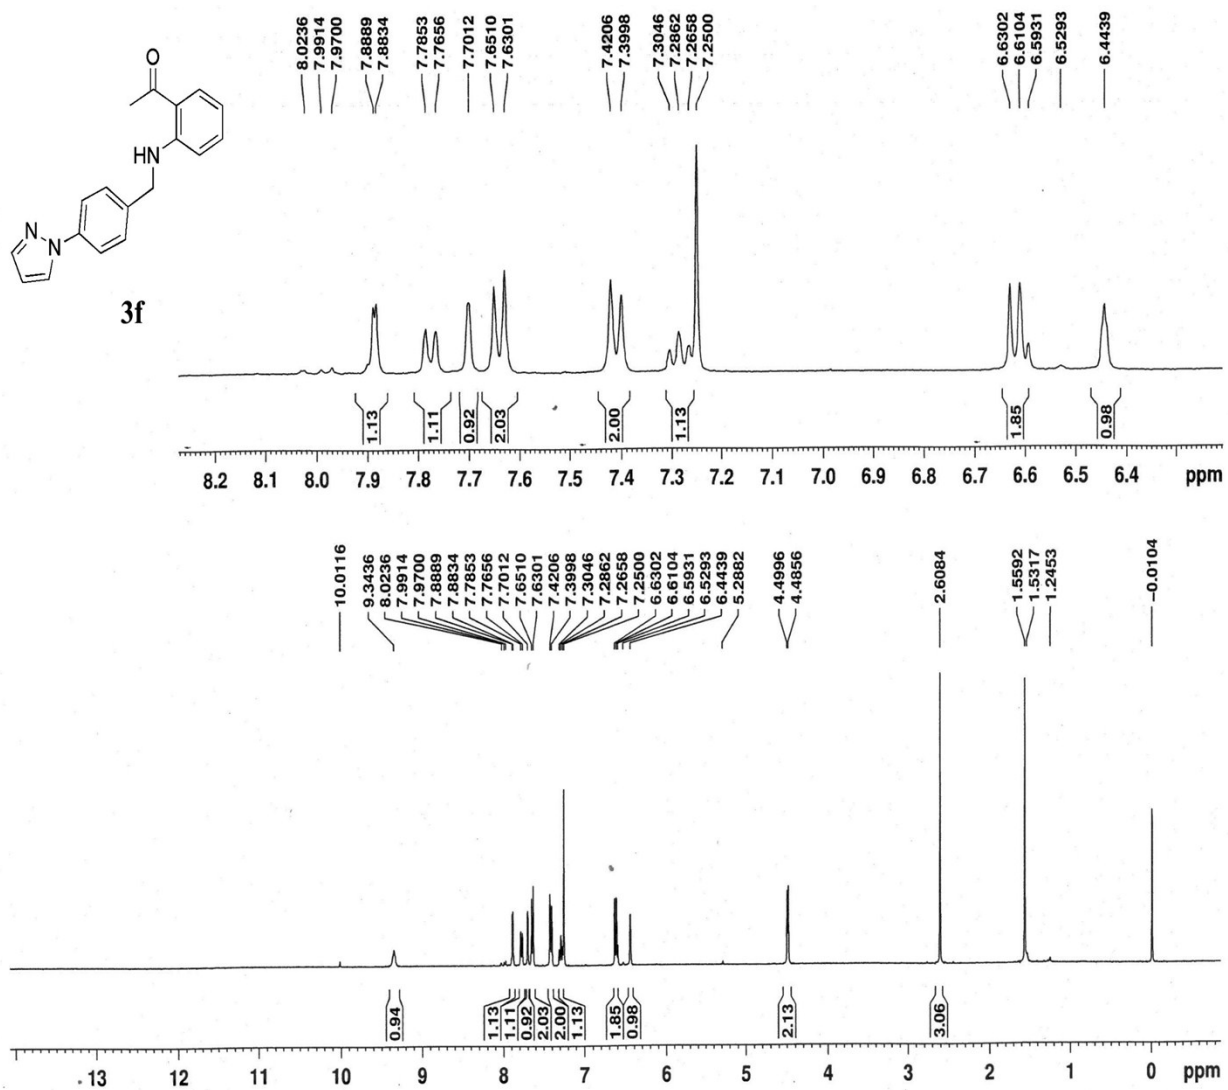

Fig. S11. <sup>1</sup>H NMR spectrum



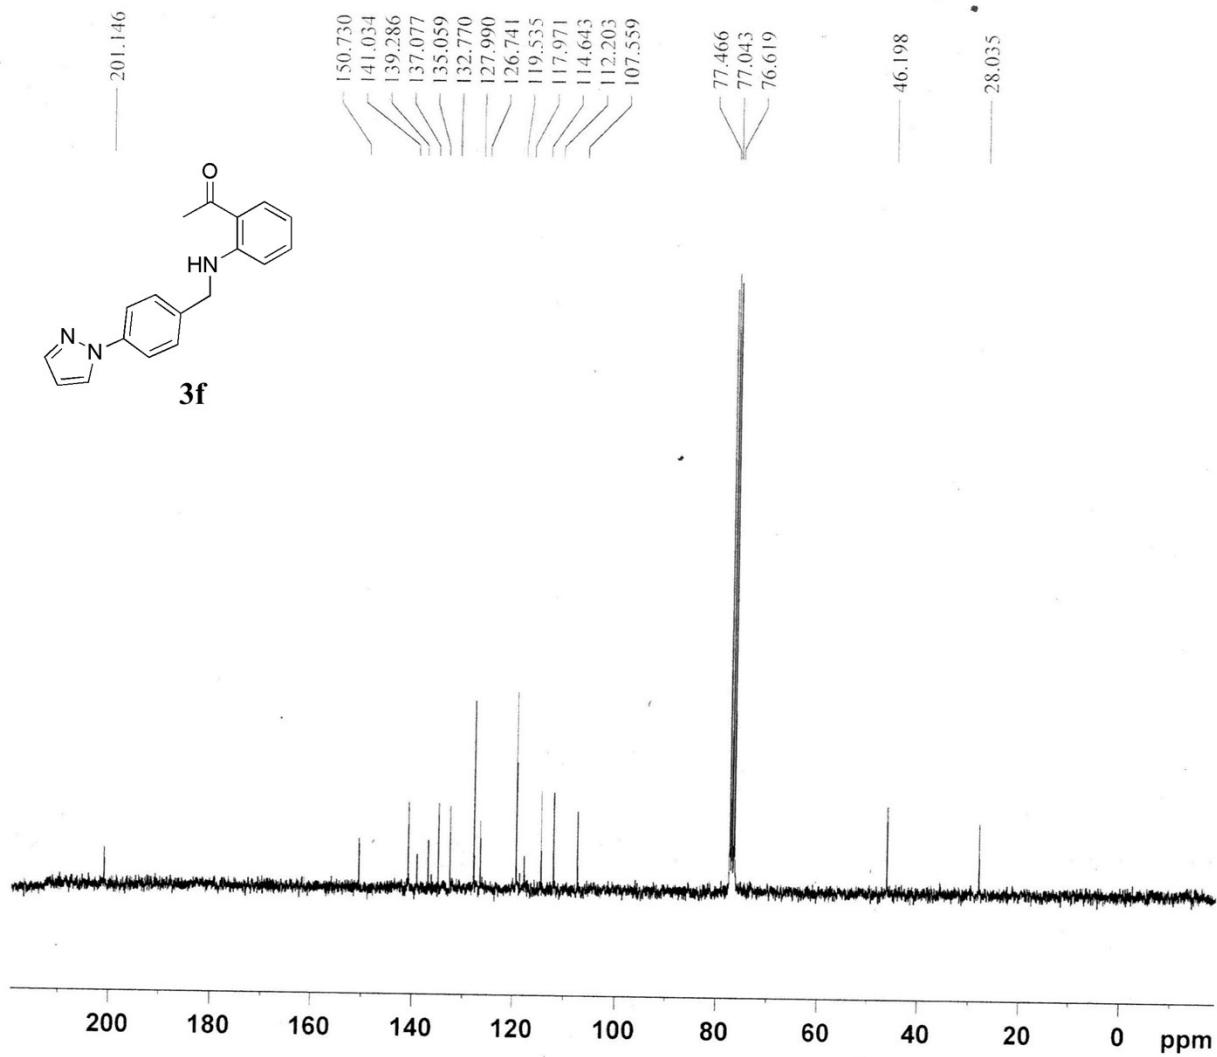

Fig. S12. <sup>13</sup>C NMR spectrum

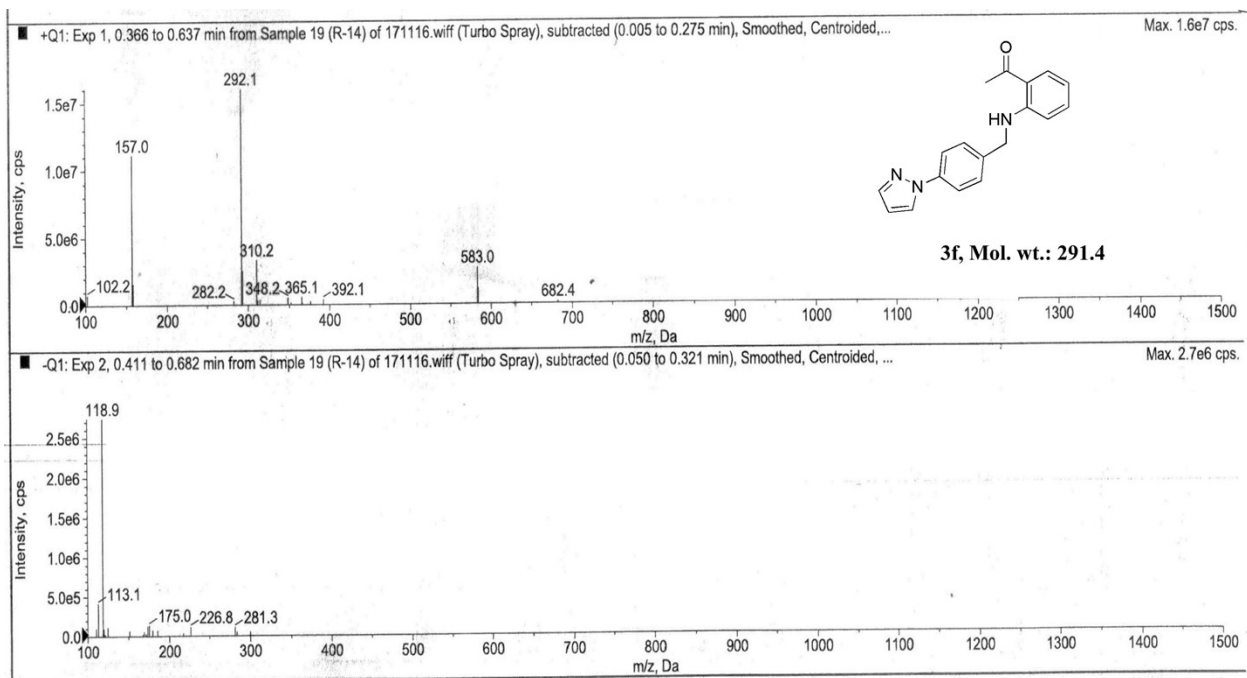

**Fig. S13:** ESI-MS spectrum

#### 4.5. Ethyl 1-(4-(1H-pyrazol-1-yl)benzyl)-4-oxo-1,4-dihydroquinoline-2-carboxylate (4f)

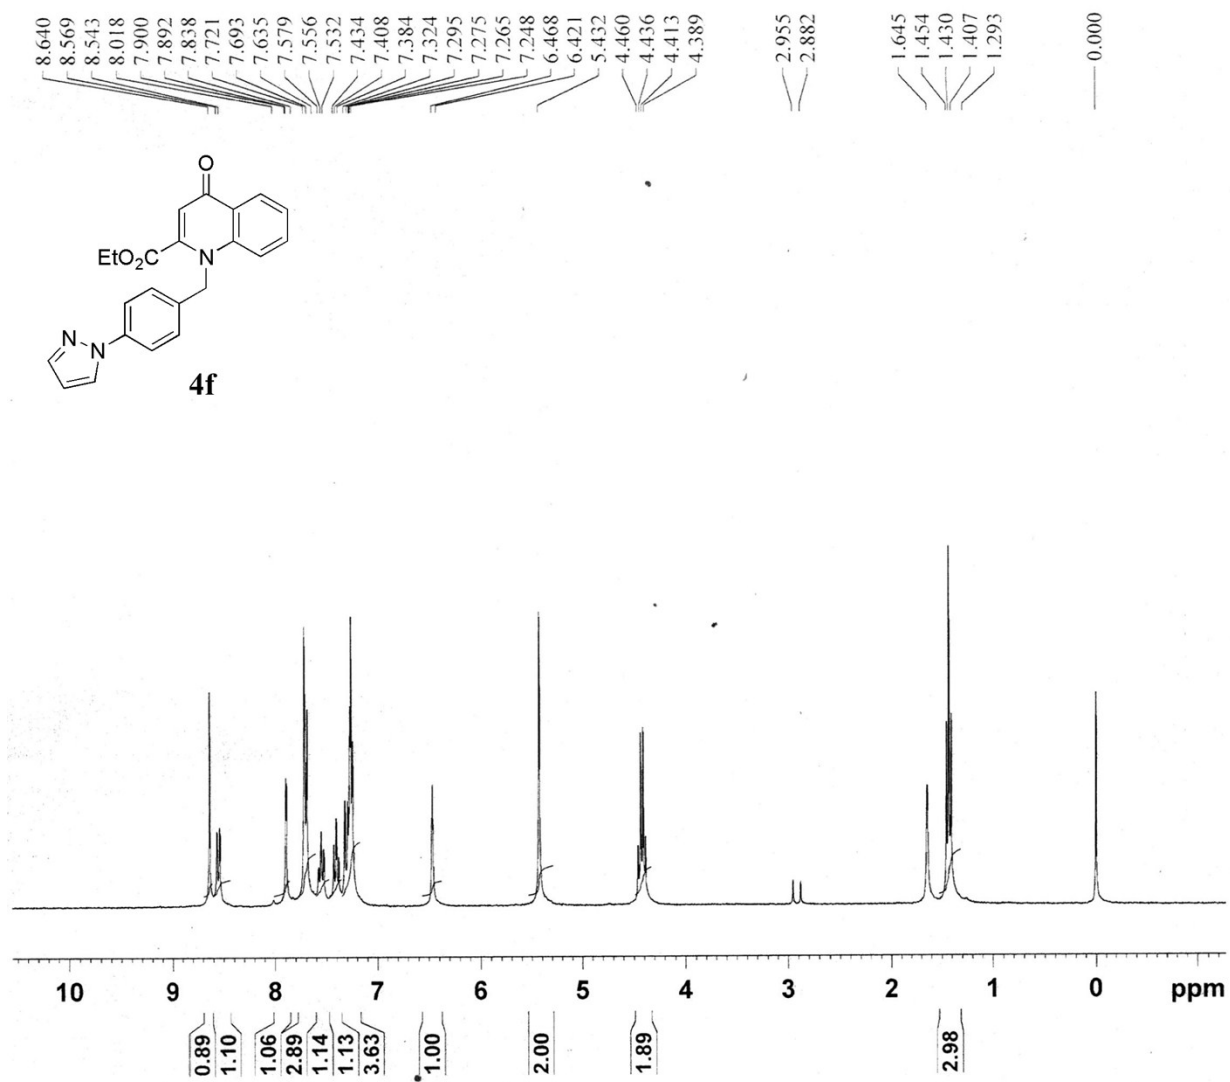

Fig. S14.  $^1\text{H}$  NMR spectrum

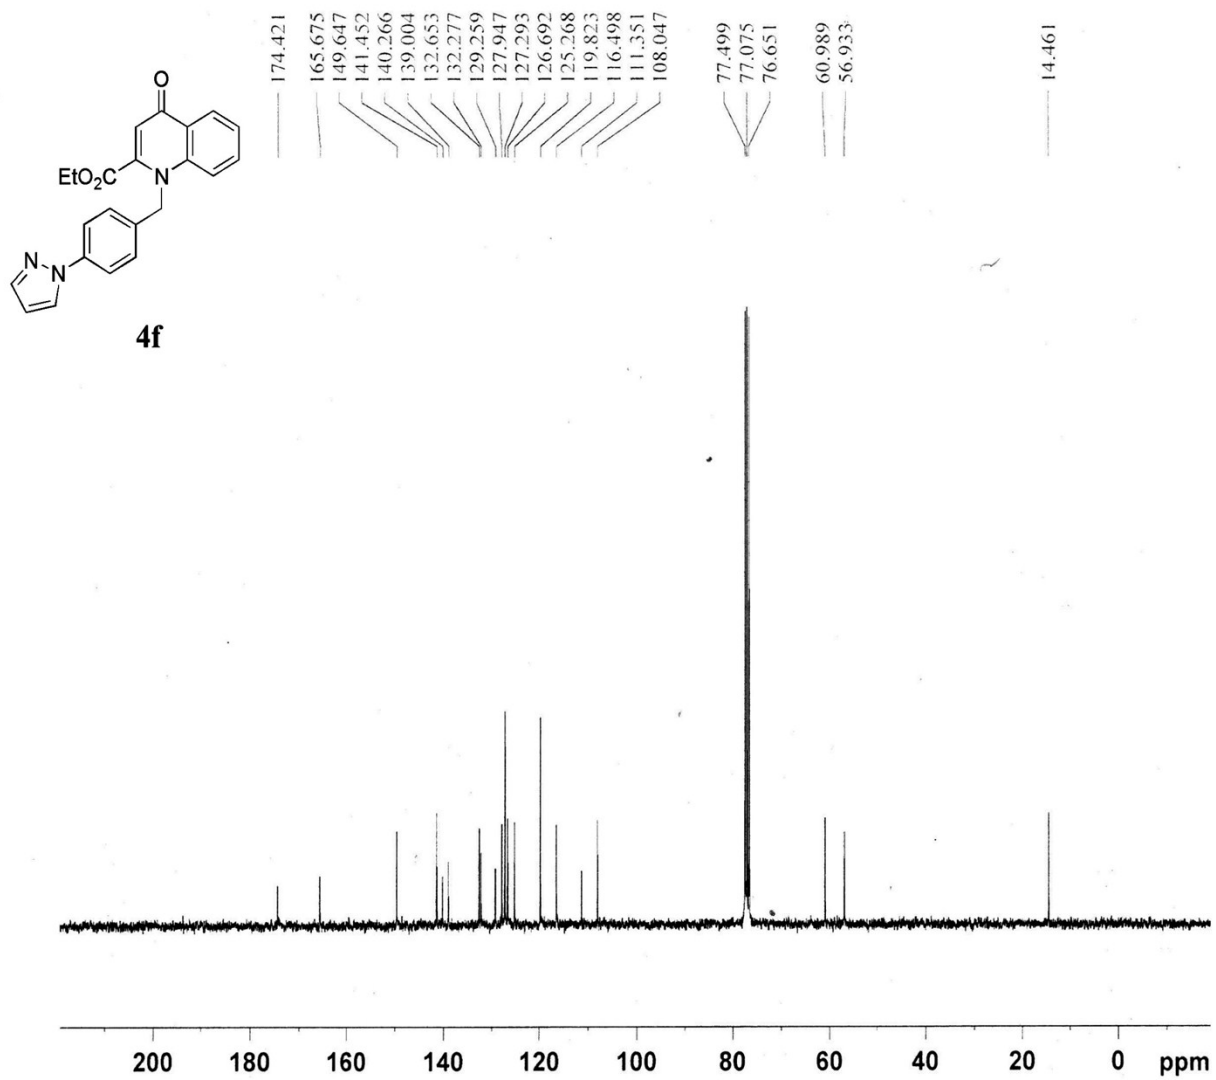

Fig. S15. <sup>13</sup>C NMR spectrum

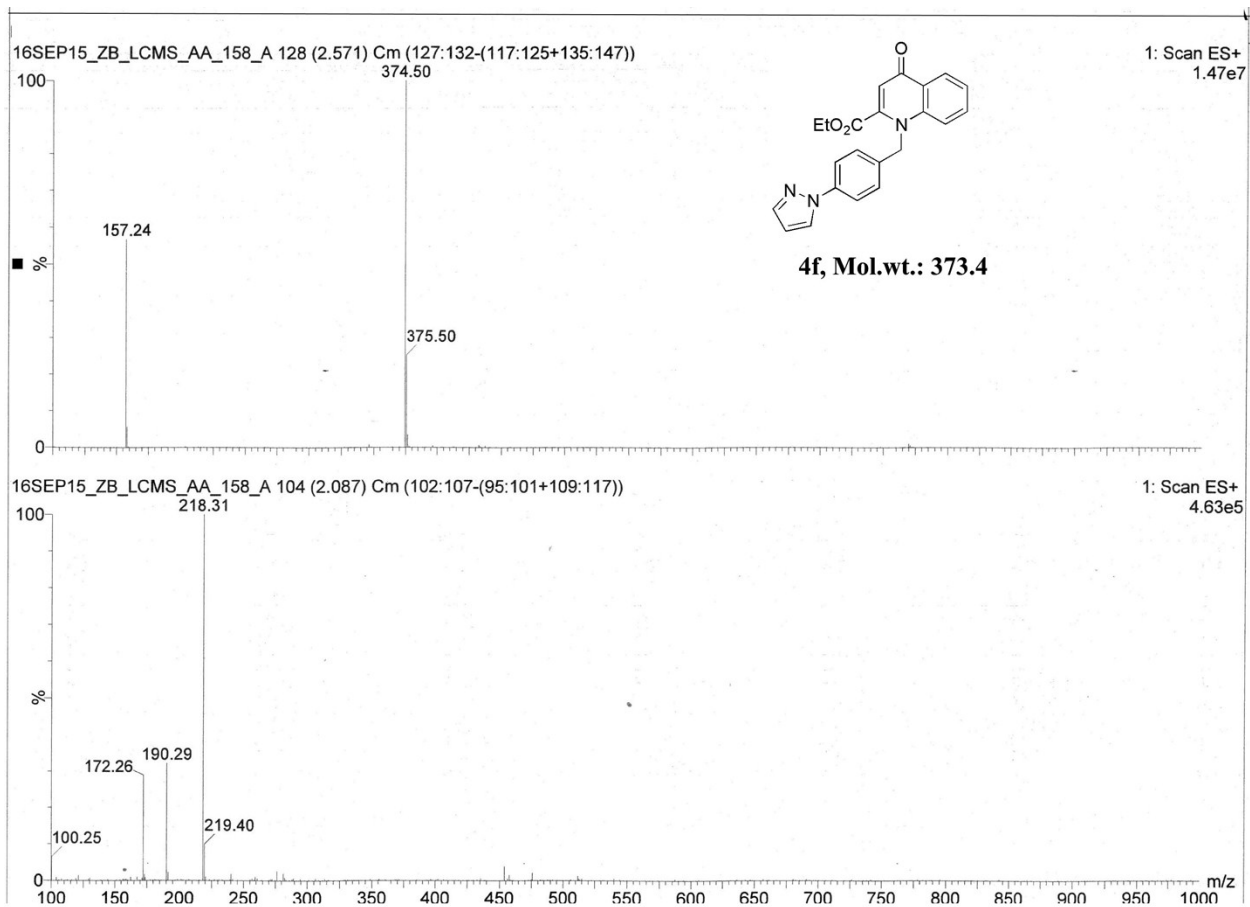

**Fig. S16.** ESI-MS spectrum

#### 4.6. 1-(4-(1*H*-pyrazol-1-yl)benzyl)-4-oxo-1,4-dihydroquinoline-2-carboxylic acid (5f)

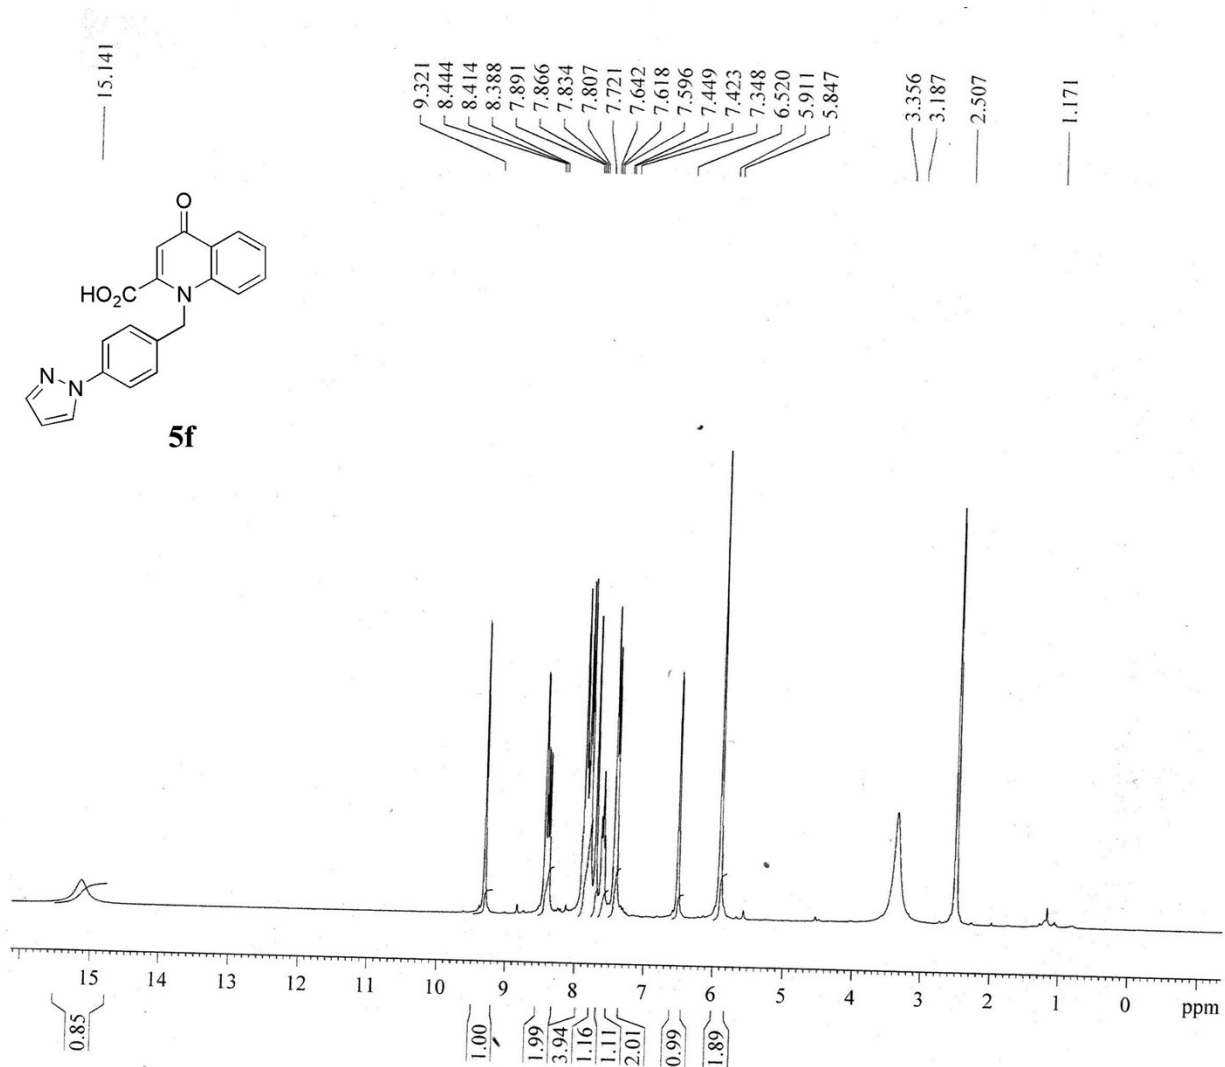

Fig. S17. <sup>1</sup>H NMR spectrum

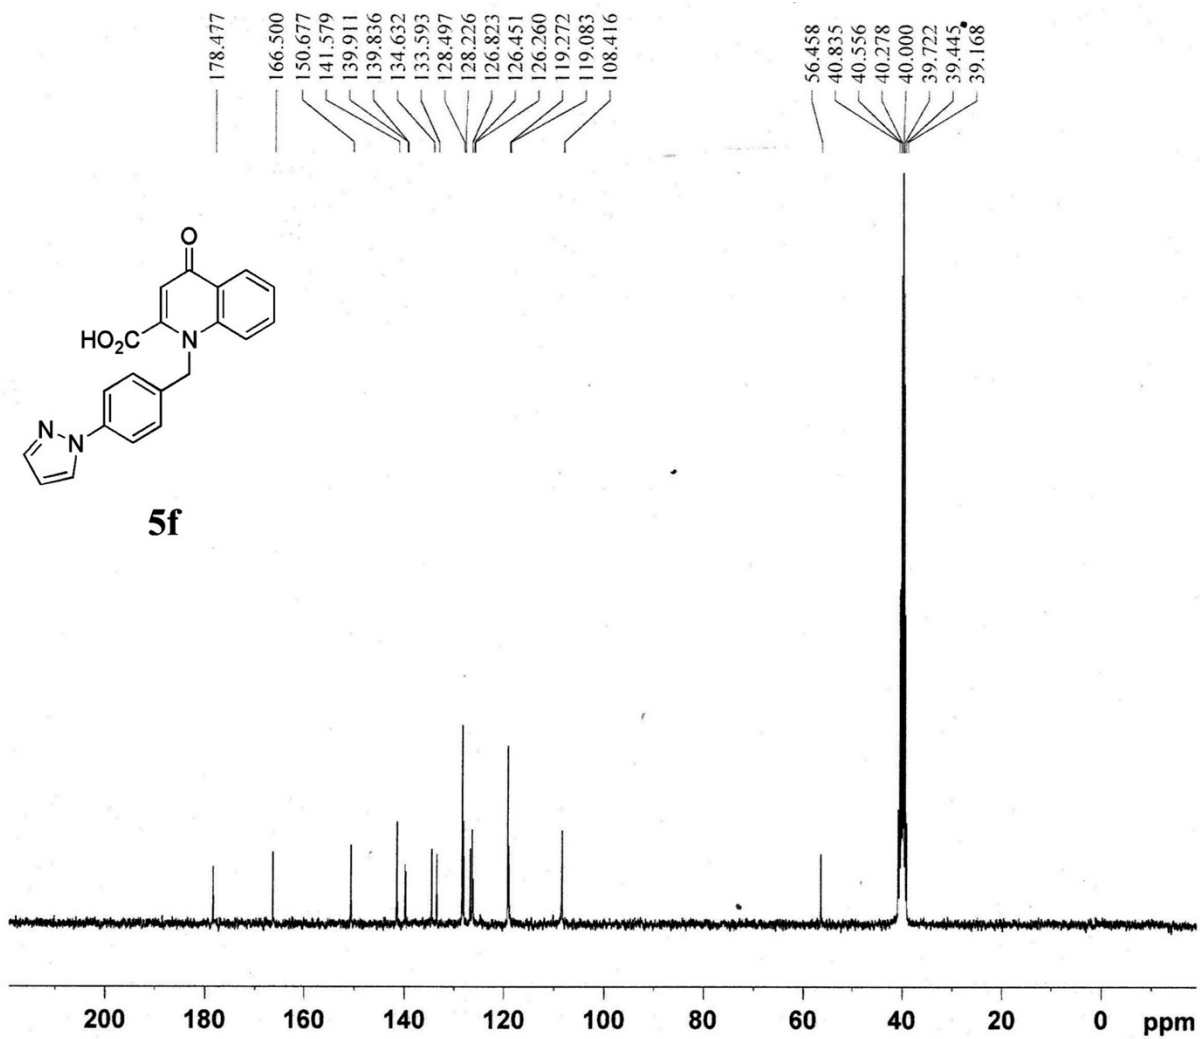

Fig. S18. <sup>13</sup>C NMR spectrum

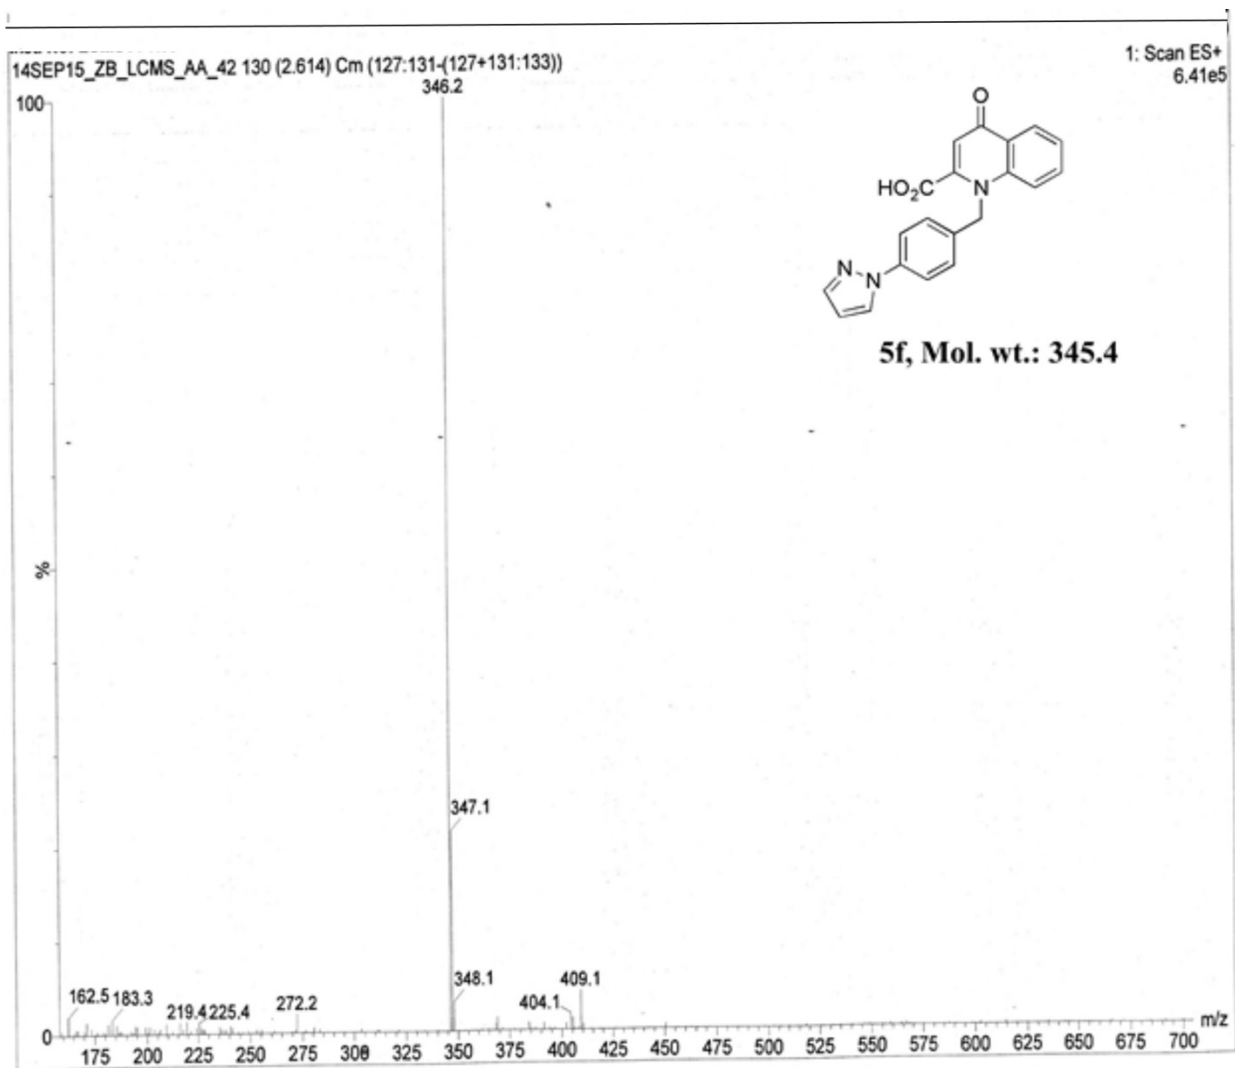

Fig. S19. ESI-MS spectrum



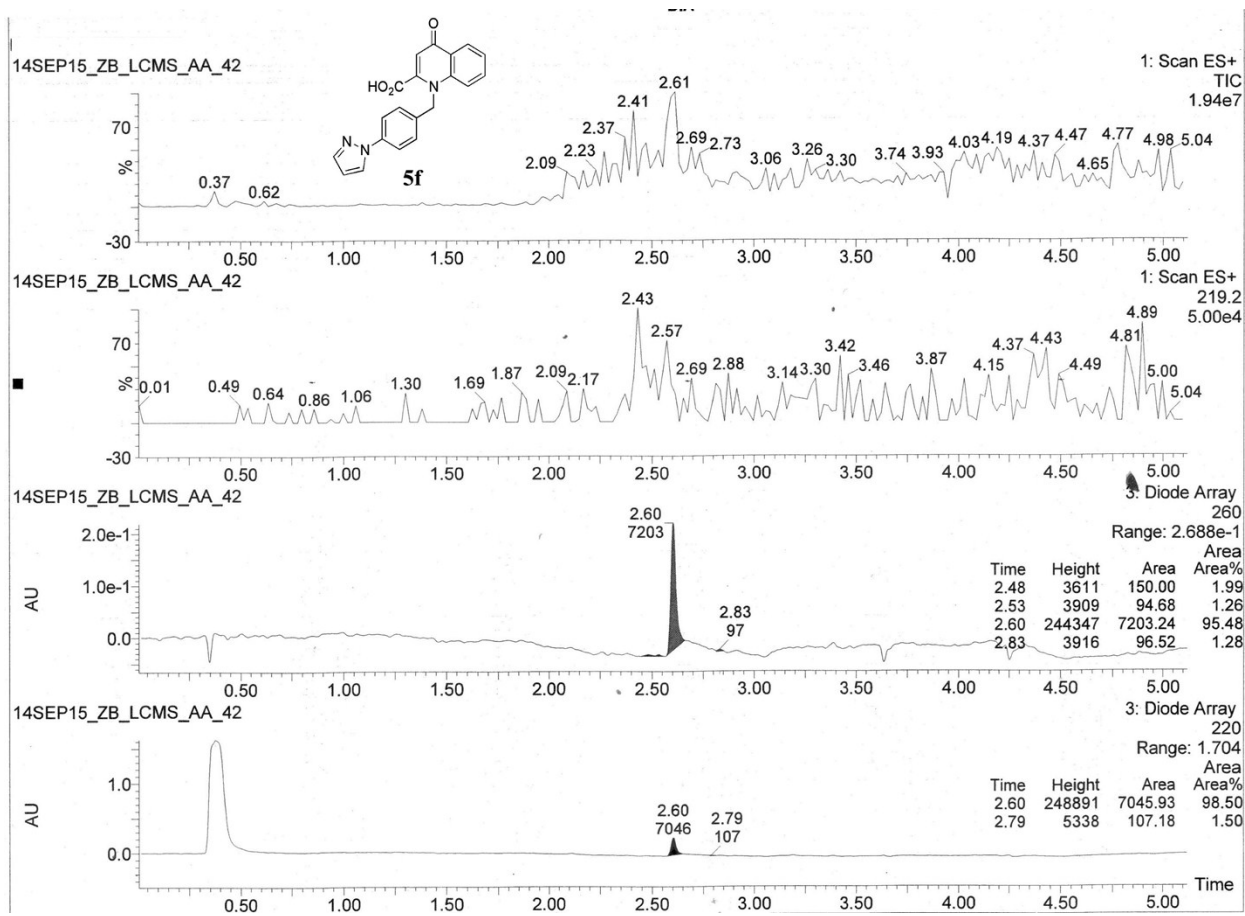

Fig. S20. HPLC spectrum

4.7. 1-(2-(4-(trifluoromethyl)benzylamino)phenyl)ethanone (3g)

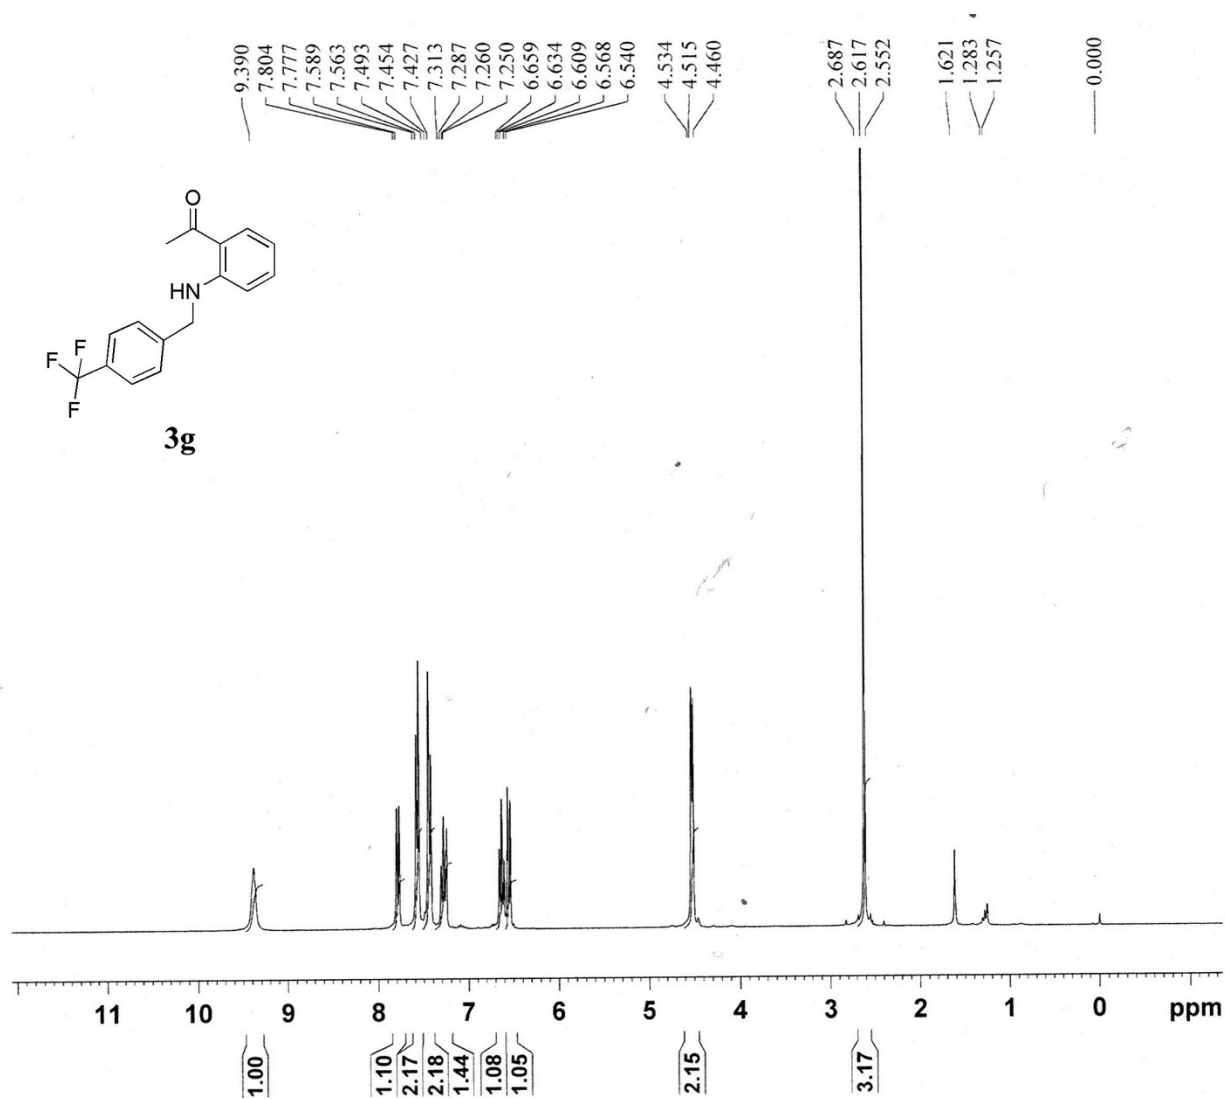

Fig. S21. <sup>1</sup>H NMR spectrum

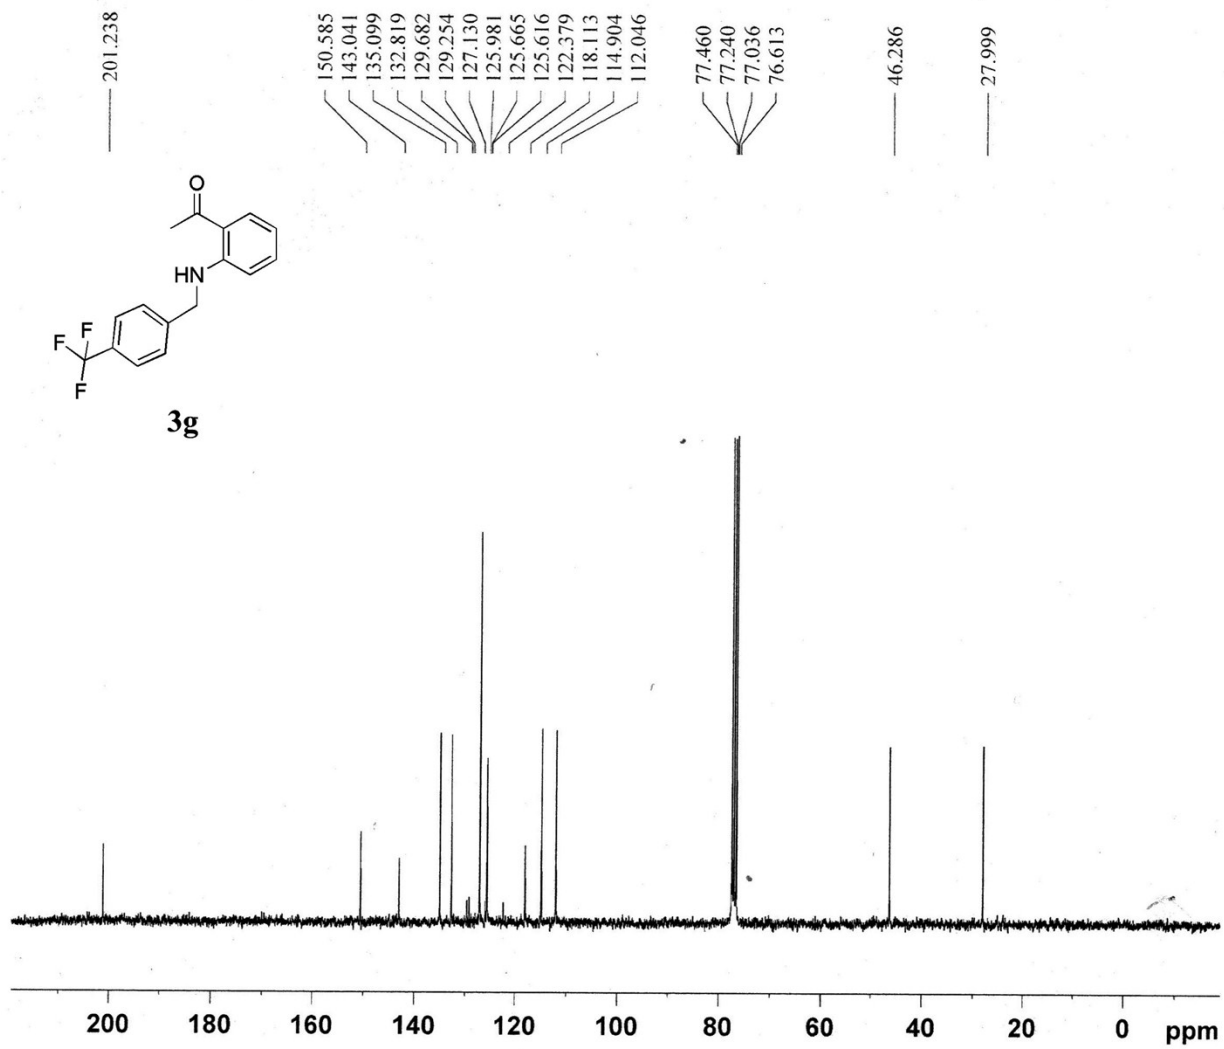

Fig. S22. <sup>13</sup>C NMR spectrum

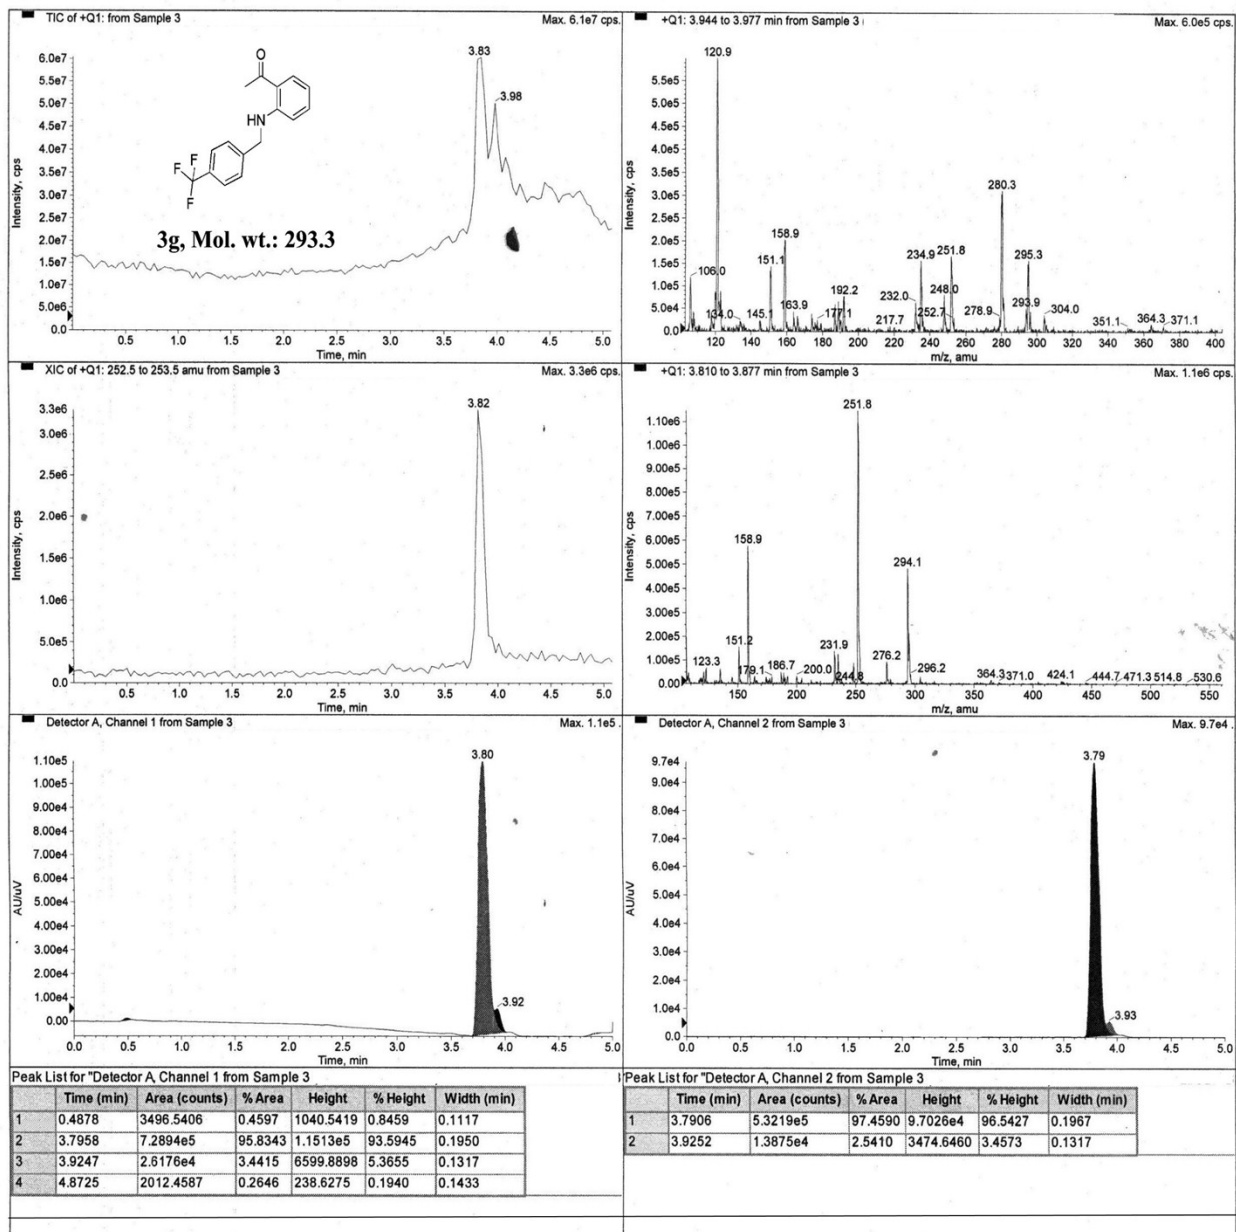

Fig. S23. Mass spectrum

#### 4.8. Ethyl 1-(4-(trifluoromethyl)benzyl)-4-oxo-1,4-dihydroquinoline-2-carboxylate (4g)

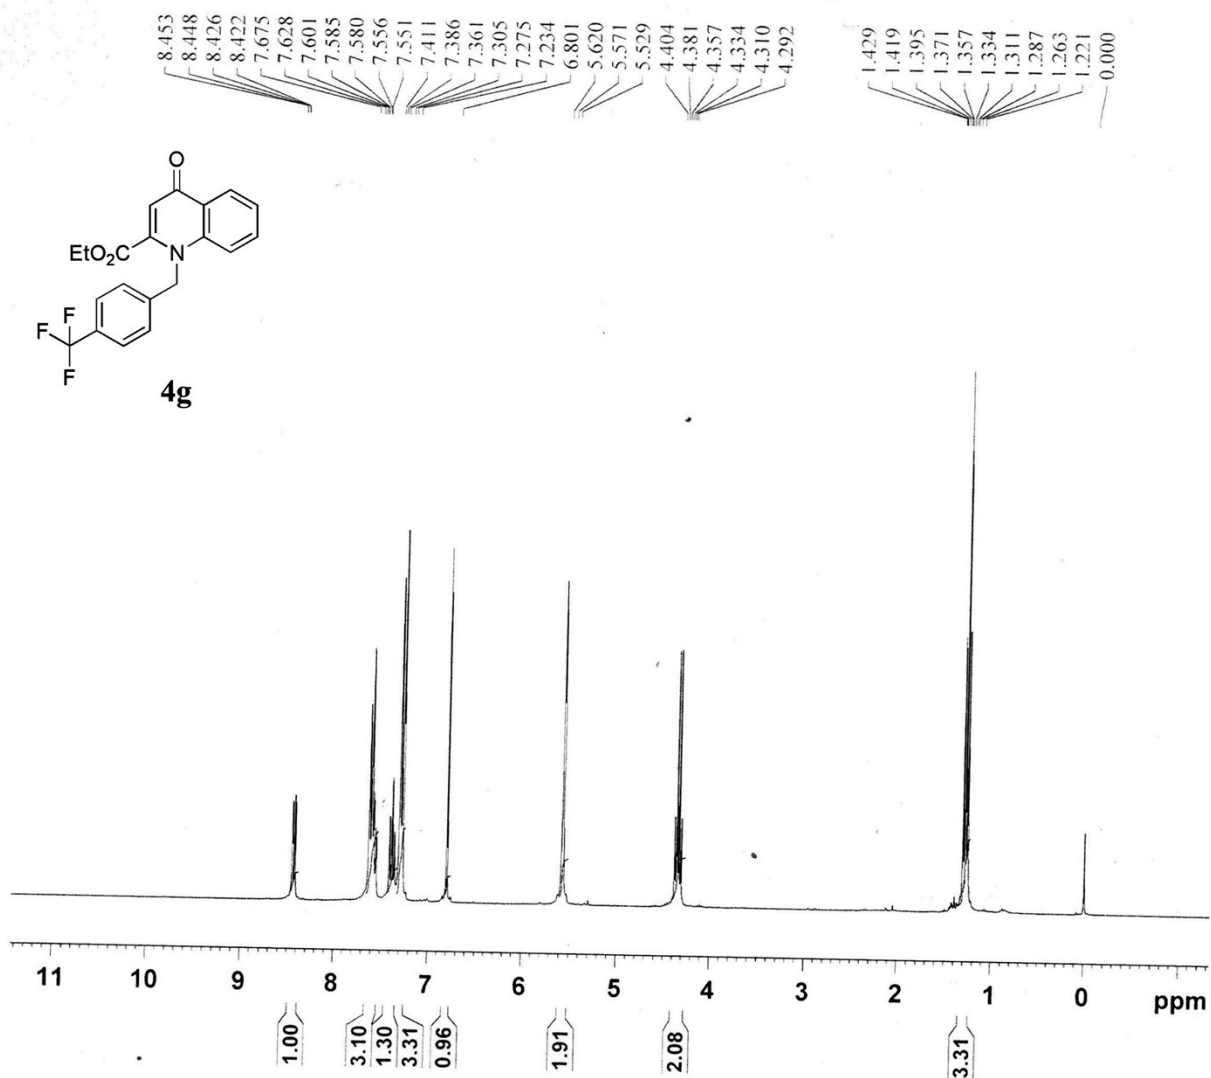

Fig. S24. <sup>1</sup>H NMR spectrum

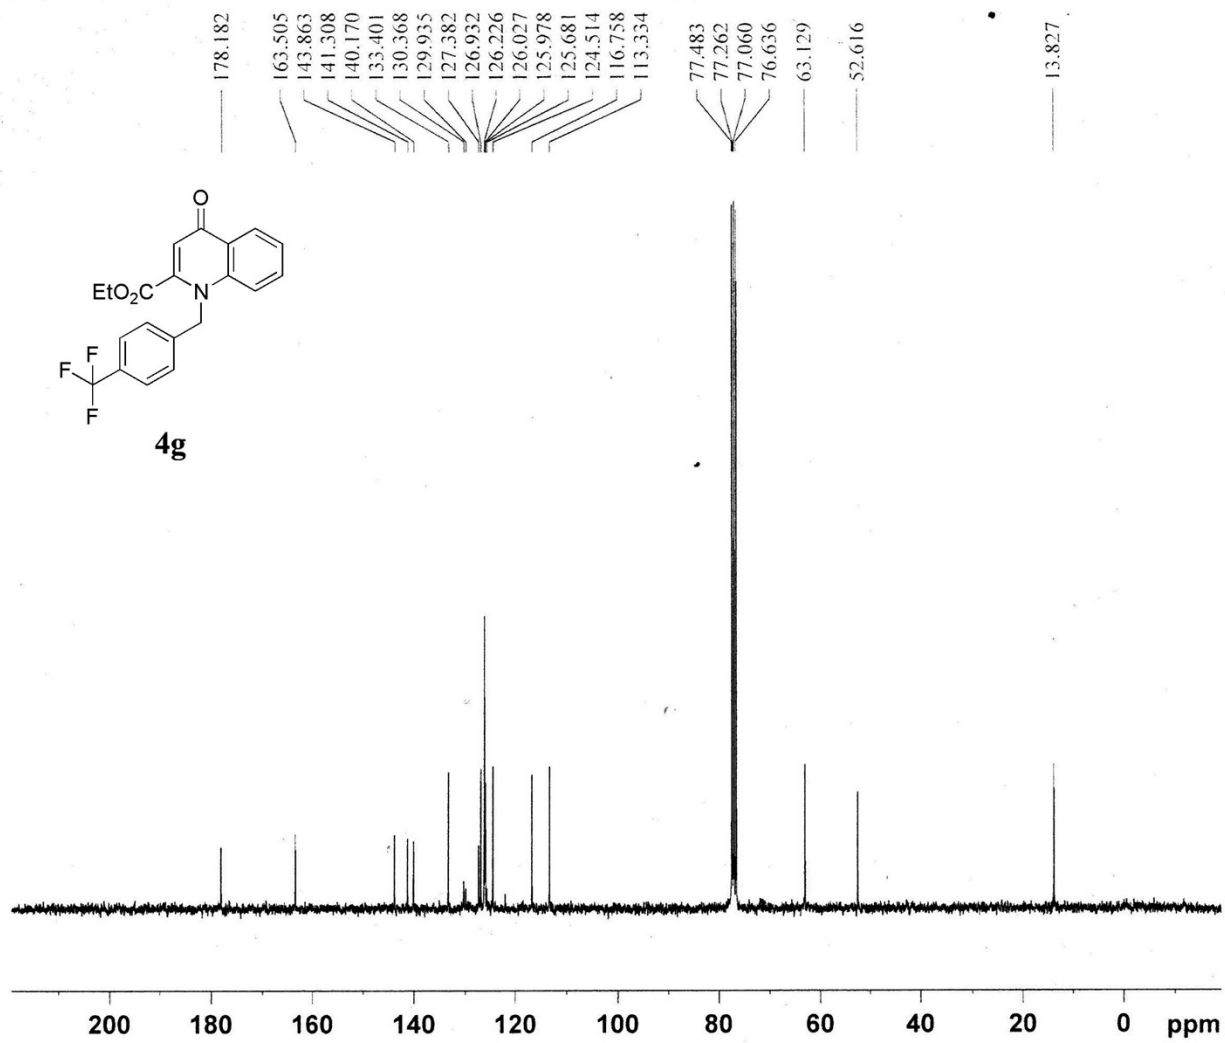

Fig. S25.  $^{13}\text{C}$  NMR spectrum

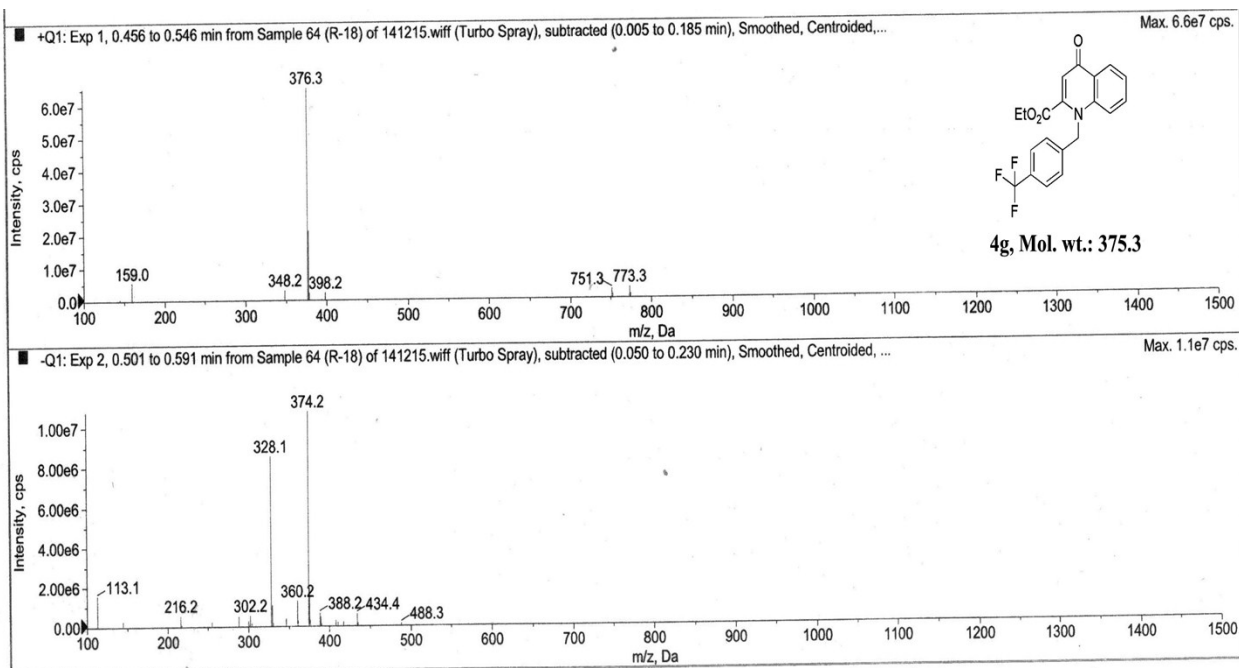

**Fig. S26.** ESI-MS spectrum

4.9. 1-(4-(trifluoromethyl)benzyl)-4-oxo-1,4-dihydroquinoline-2-carboxylic acid (5g)

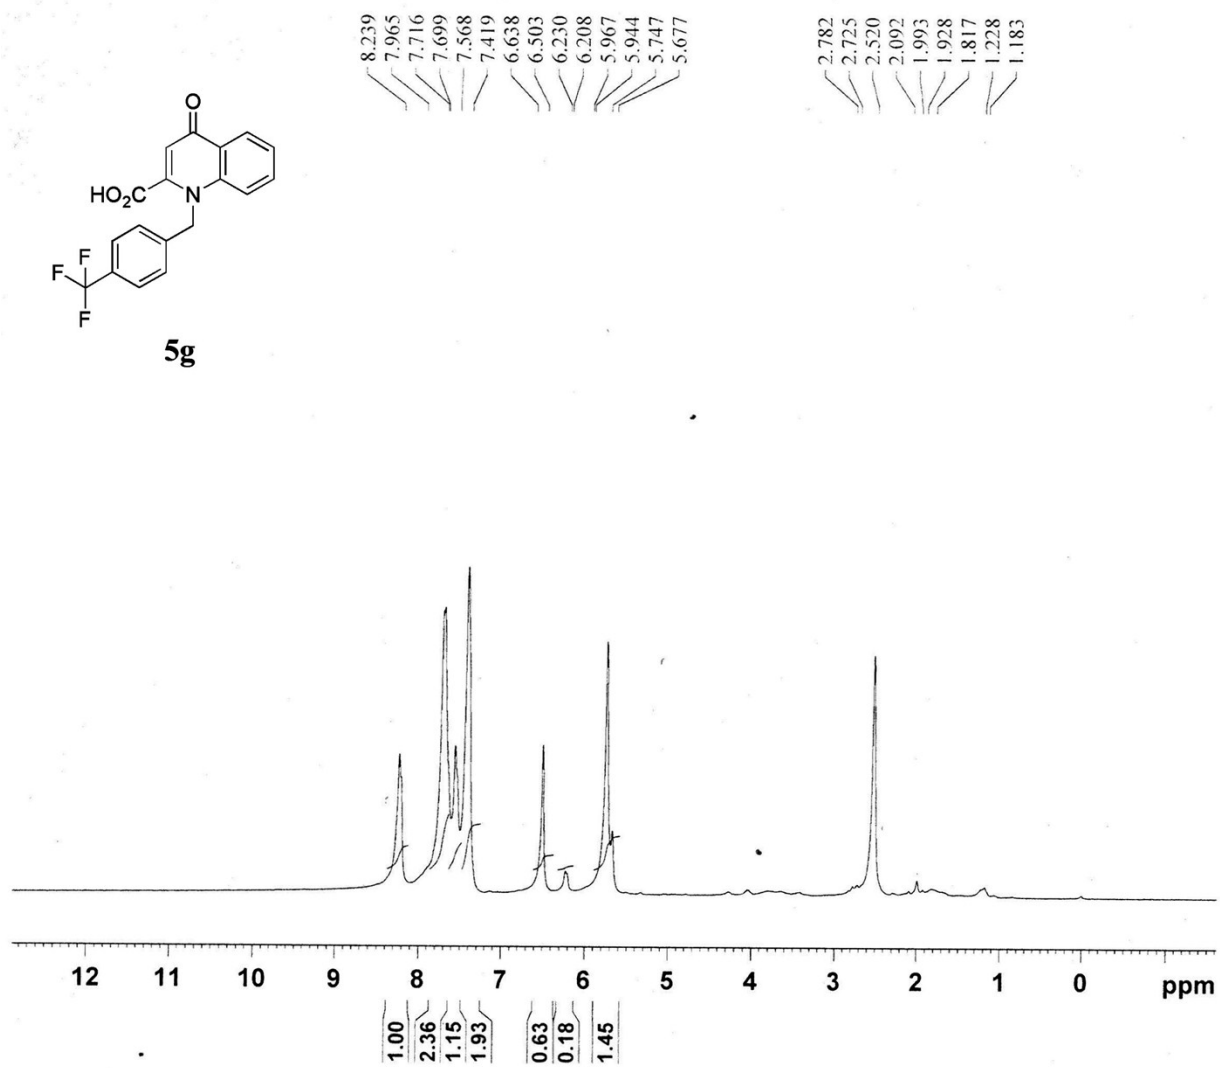

Fig. S27. <sup>1</sup>H NMR spectrum



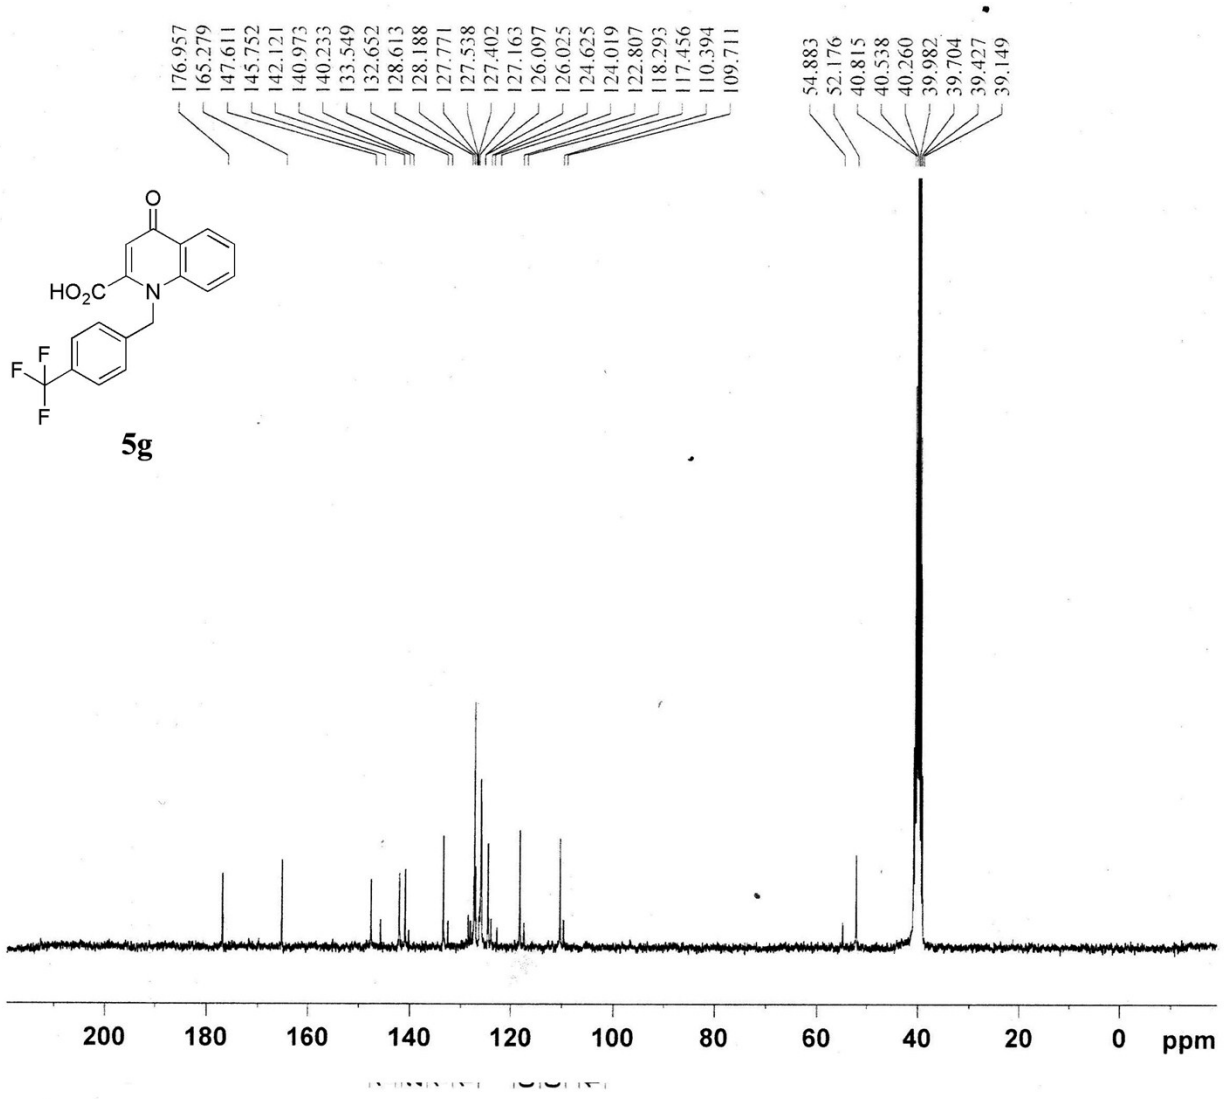

Fig. S28. <sup>13</sup>C NMR spectrum

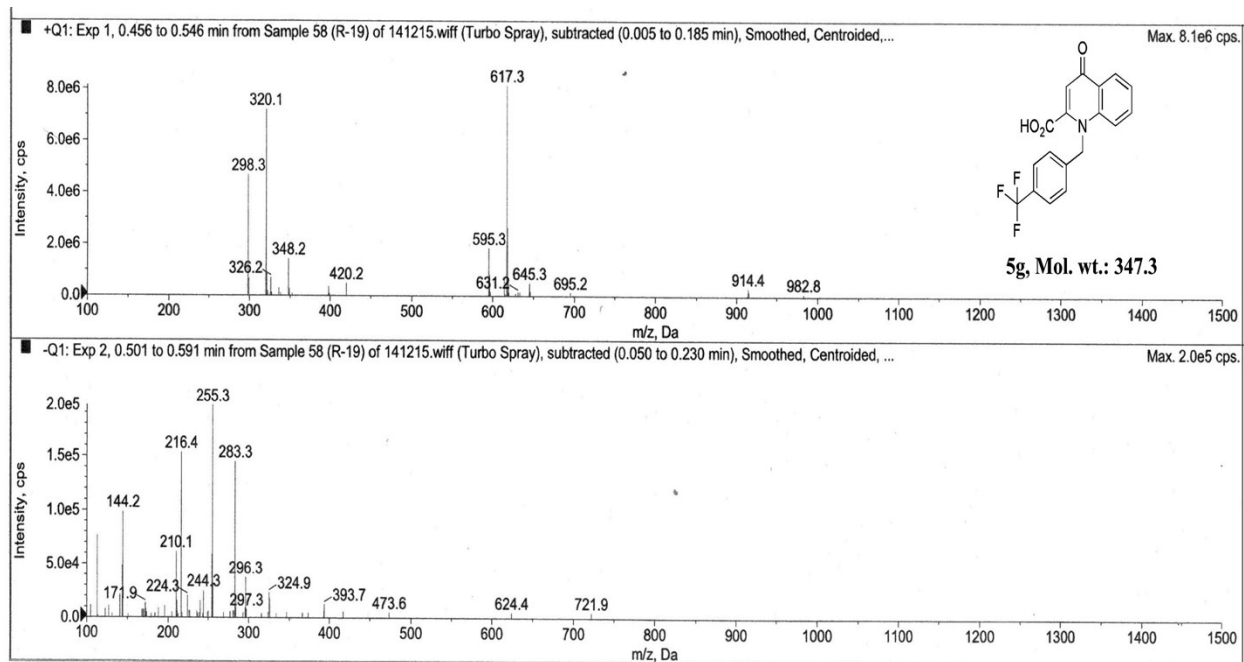

**Fig. S29.** ESI-MS spectrum

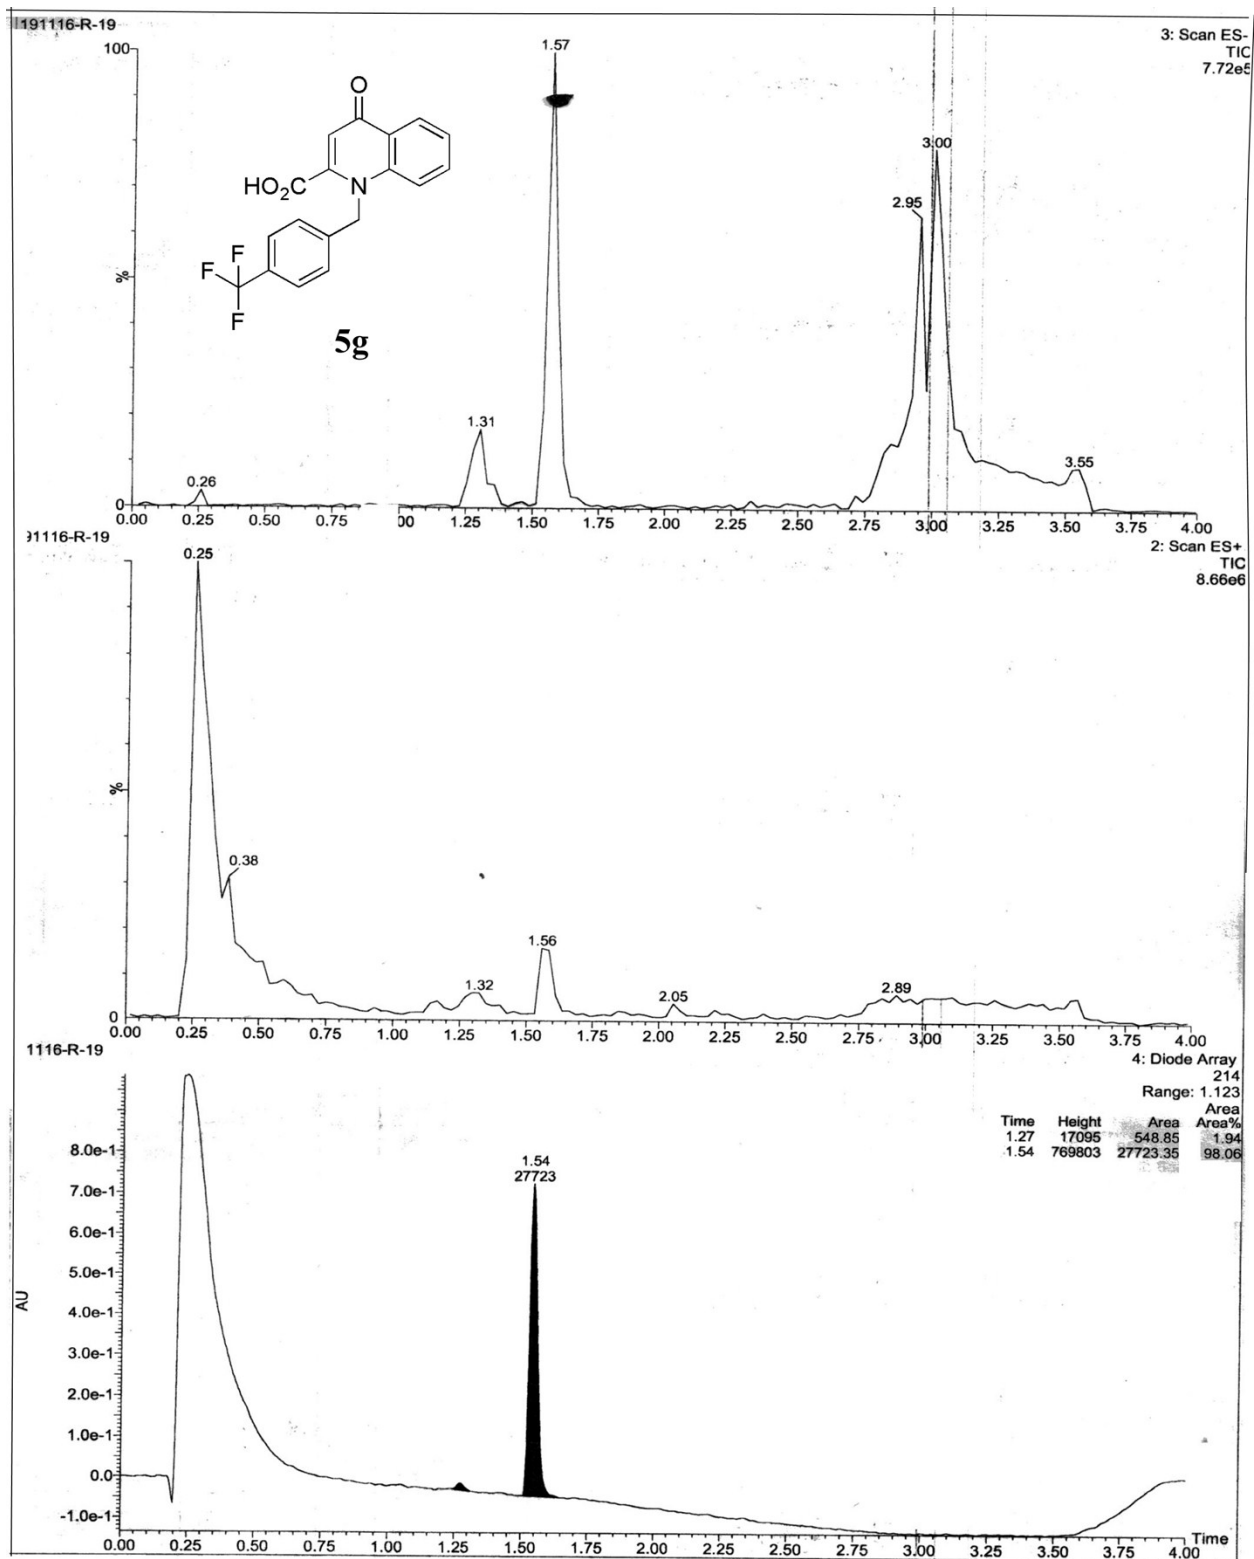

Fig. S30. HPLC spectrum

#### 4.10. 1-((2-(furan-2-ylmethyl)amino)phenyl)ethanone (3i)

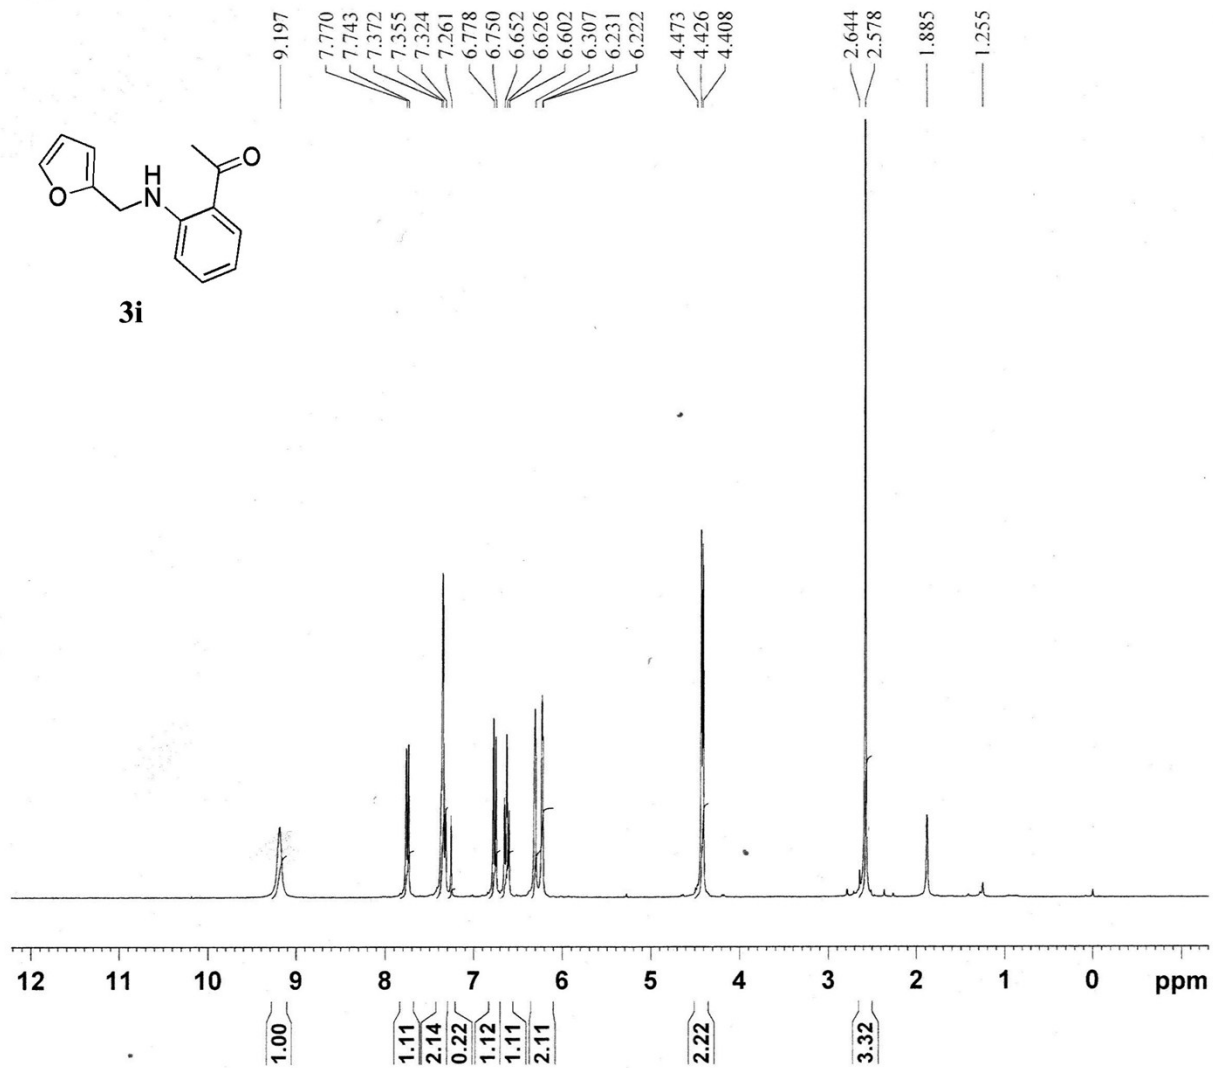

Fig. S31. <sup>1</sup>H NMR spectrum

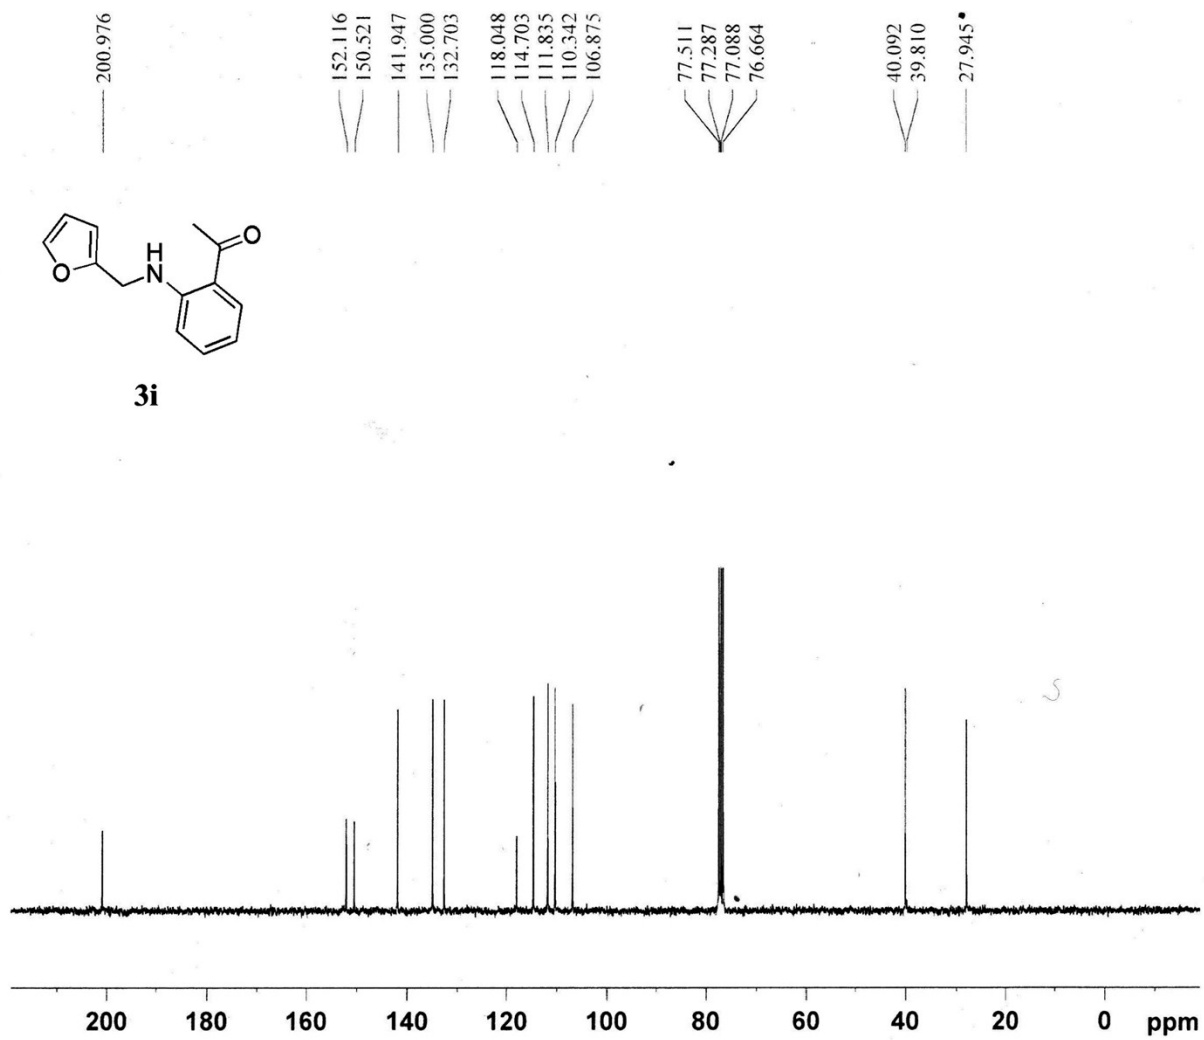

Fig. S32. <sup>13</sup>C NMR spectrum

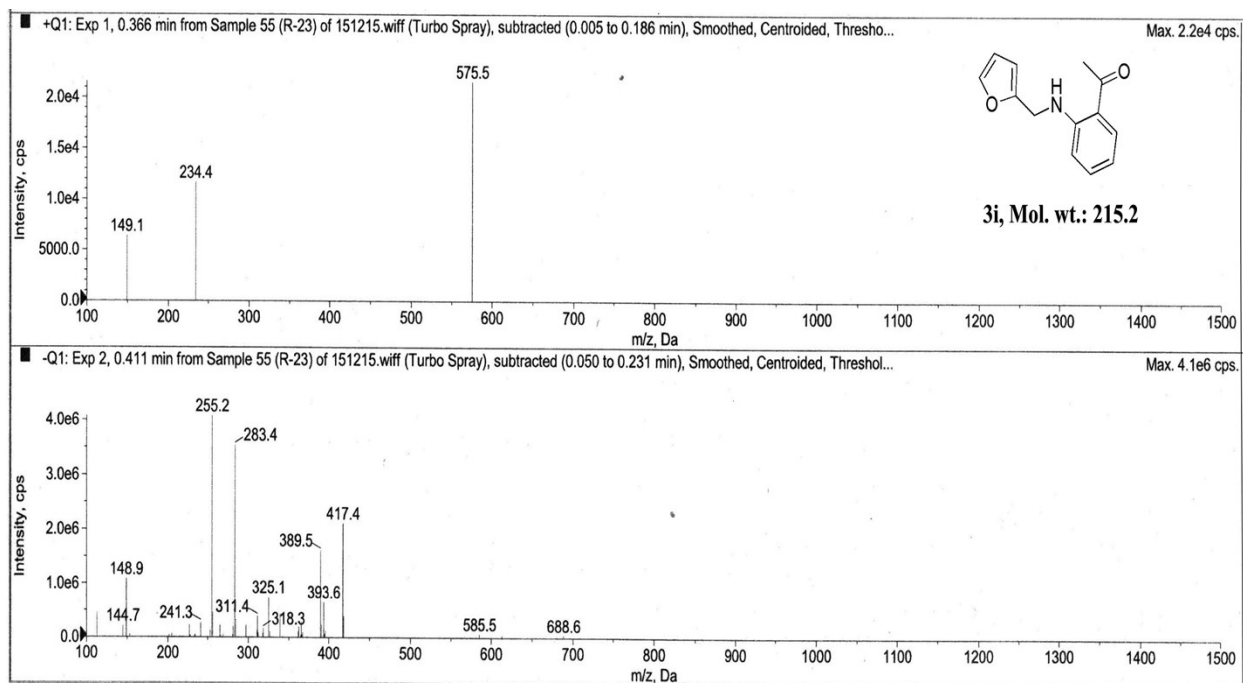

**Fig. S33.** ESI-MS spectrum

#### 4.11. Ethyl 1-(furan-2-ylmethyl)-4-oxo-1,4-dihydroquinoline-2-carboxylate (4i)

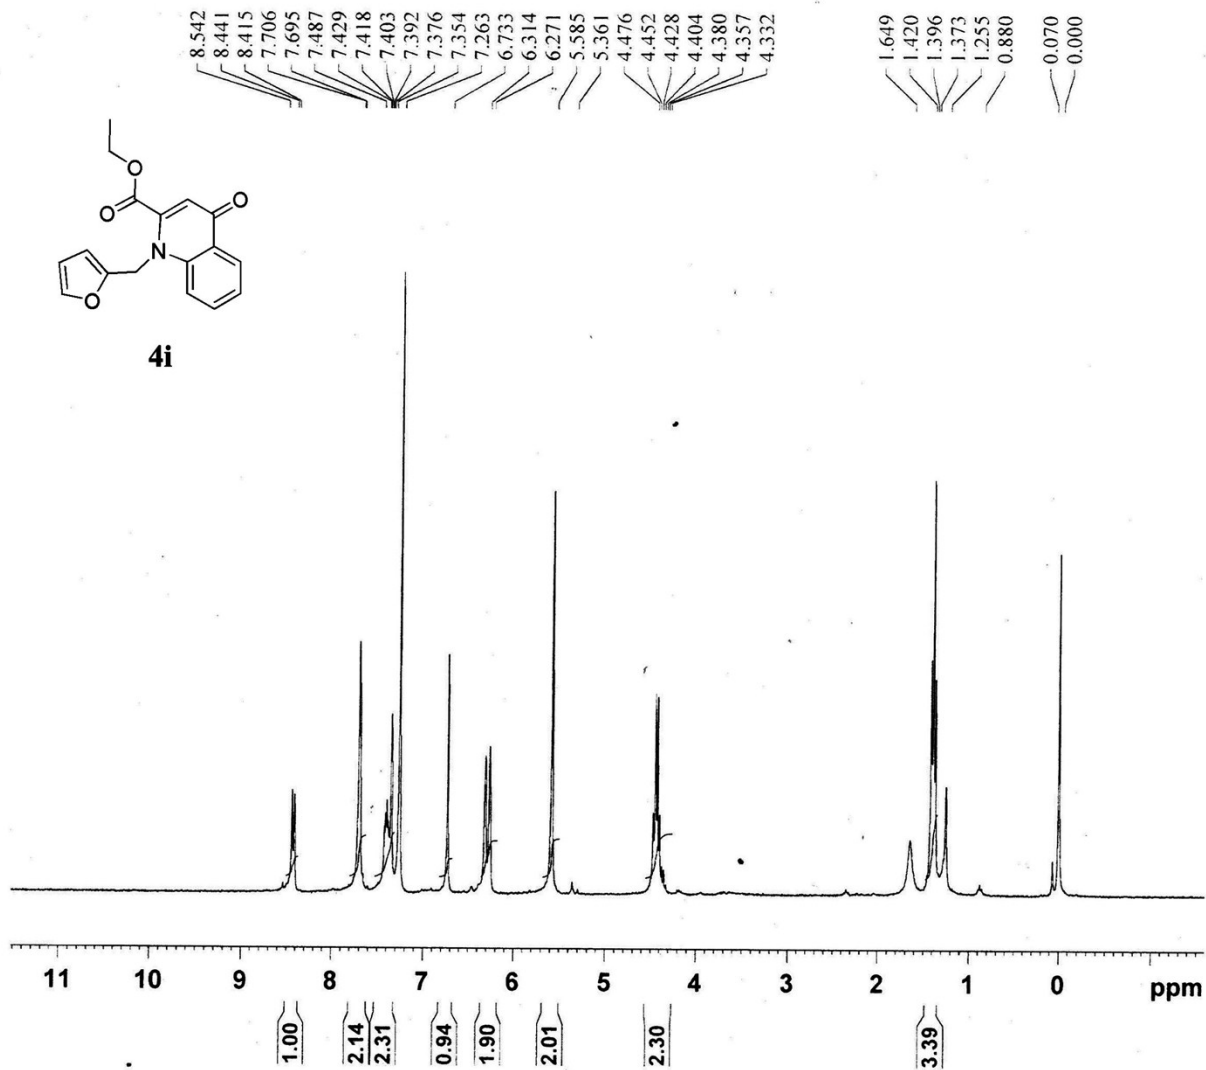

Fig. S34. <sup>1</sup>H NMR spectrum

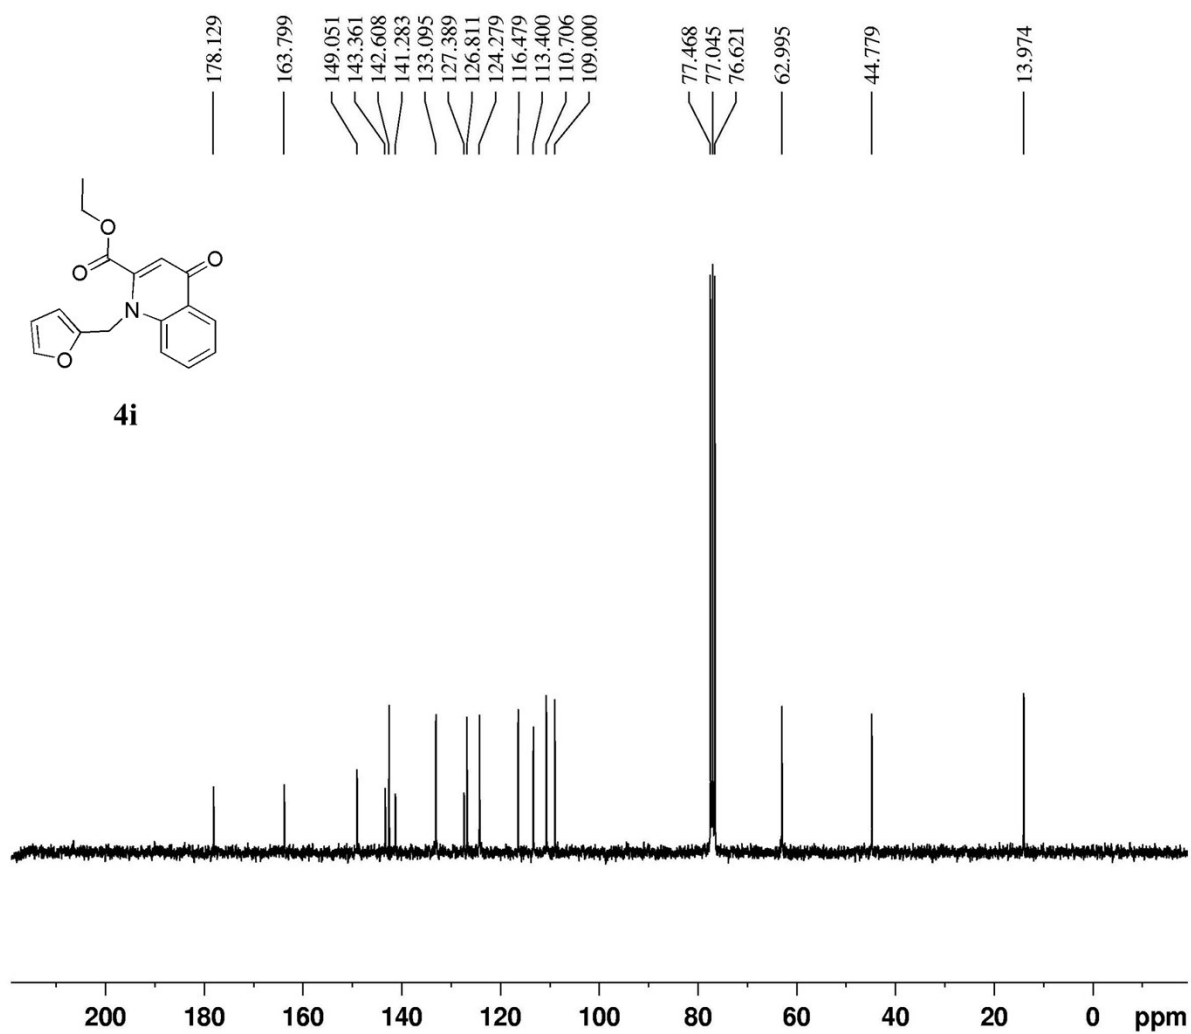

Fig. S35. <sup>13</sup>C NMR spectrum



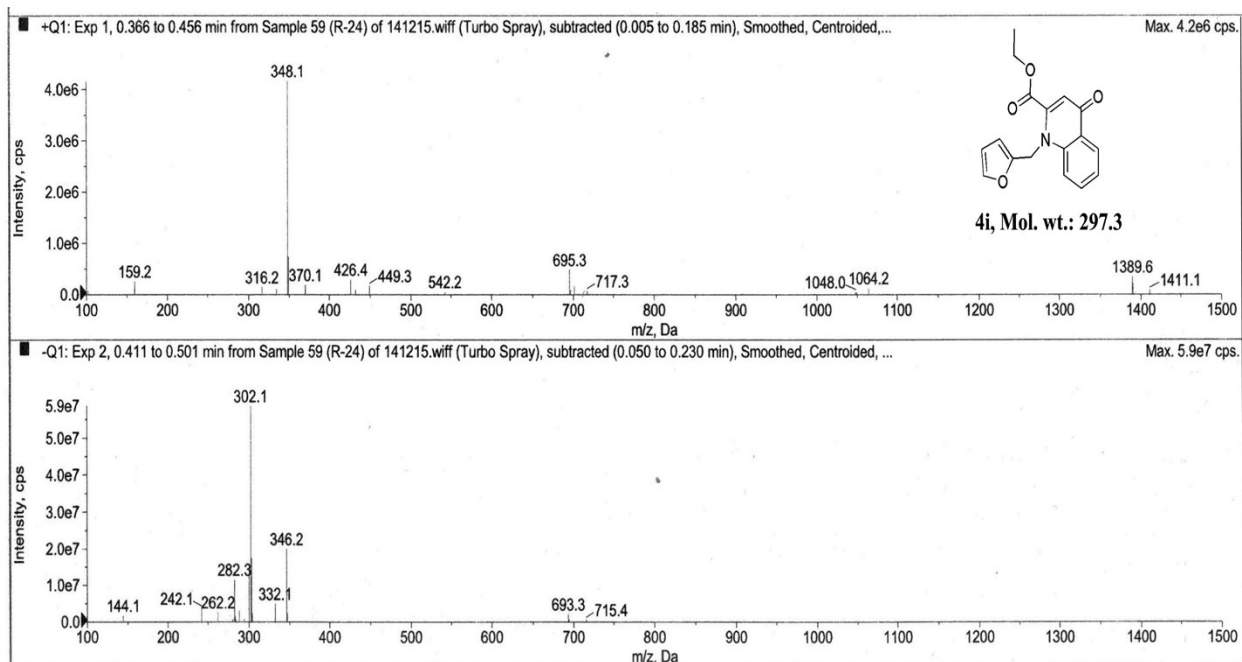

**Fig. S36. ESI-MS spectrum**

4.12. 1-(furan-2-ylmethyl)-4-oxo-1,4-dihydroquinoline-2-carboxylic acid (**5i**)

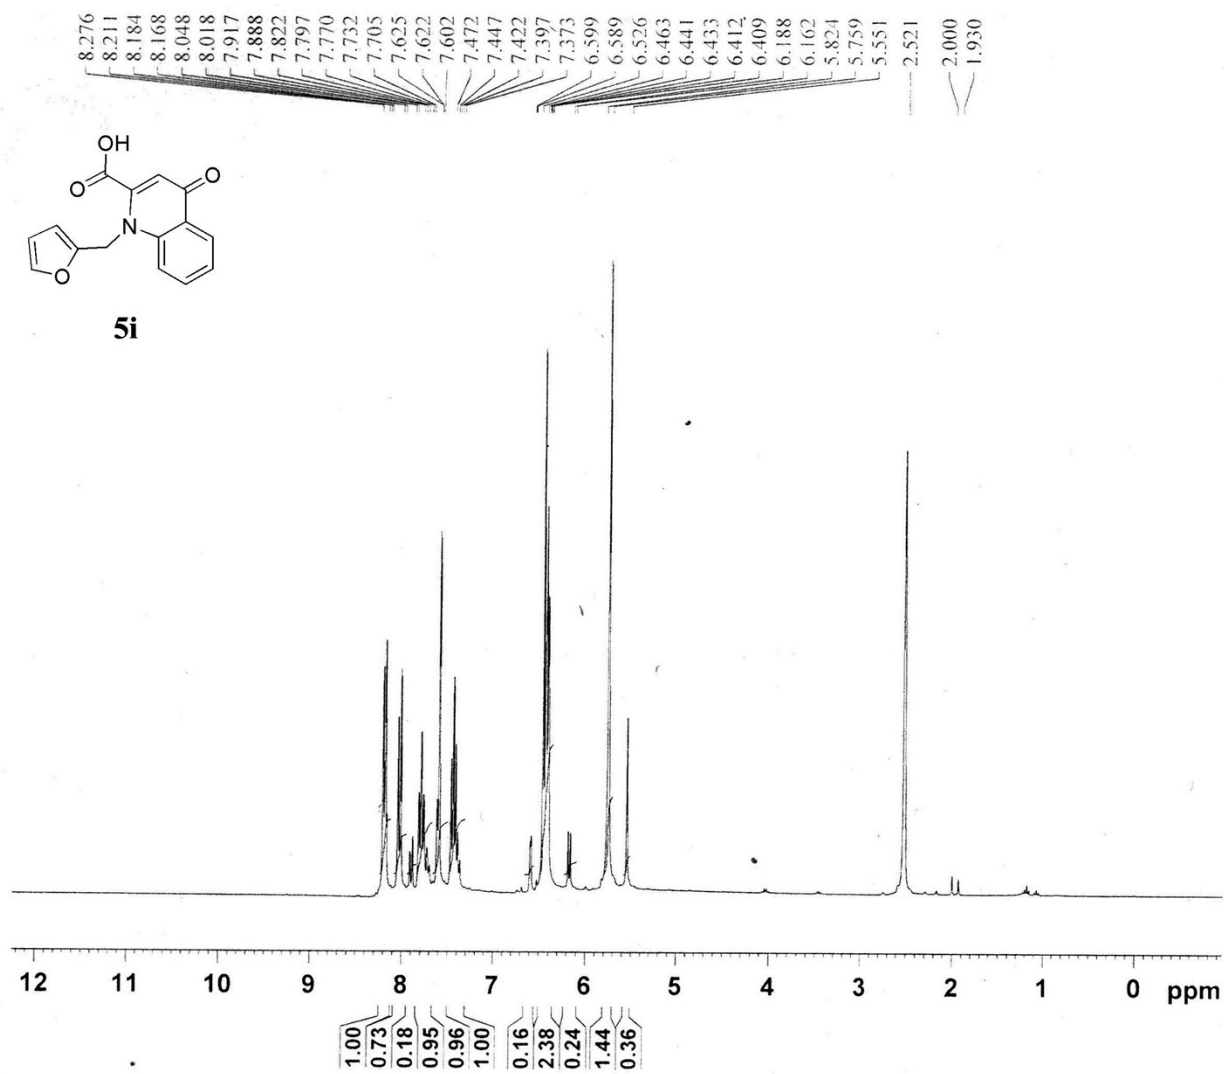

Fig. S37. <sup>1</sup>H NMR spectrum

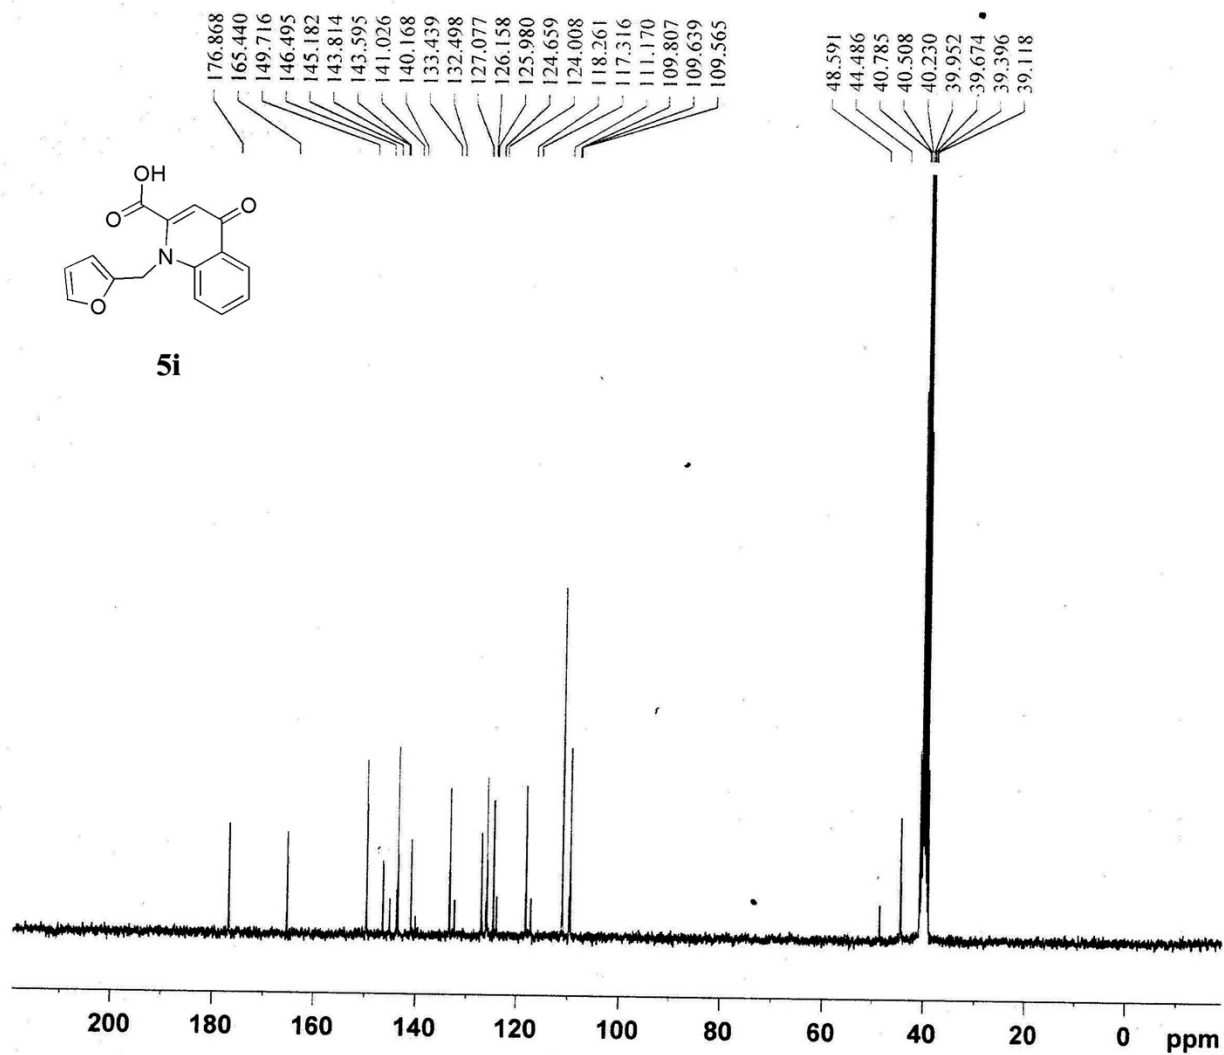

Fig. S38. <sup>13</sup>C NMR spectrum

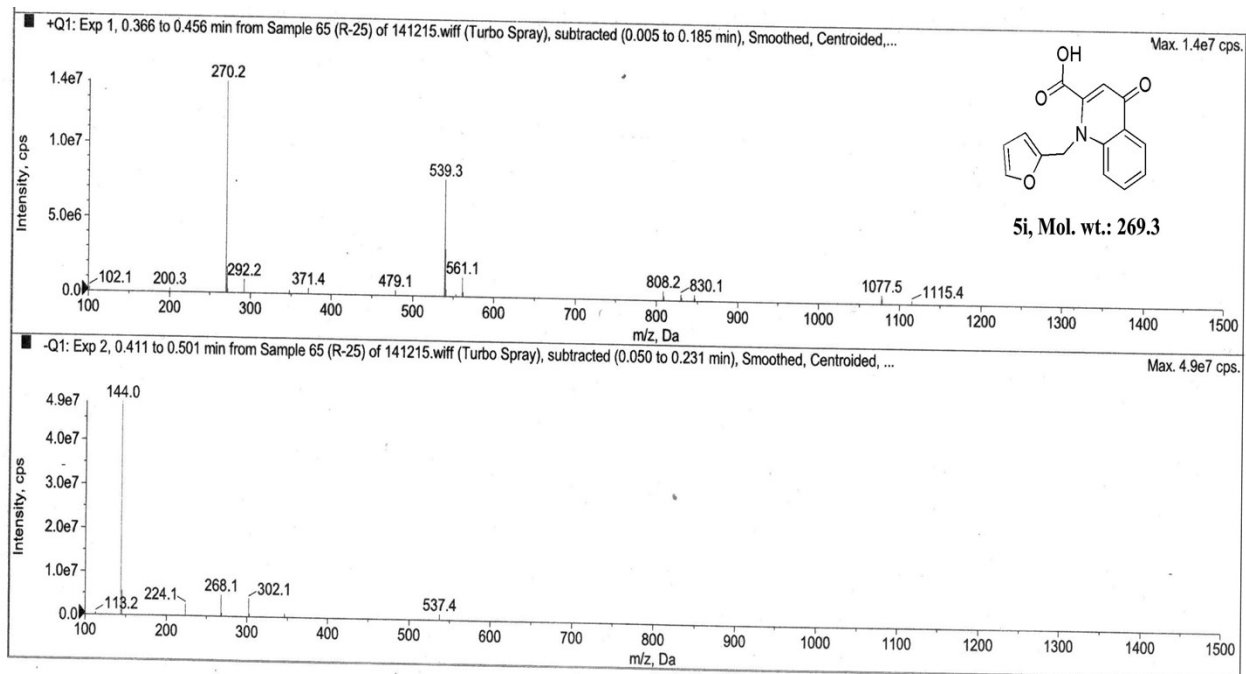

**Fig. S39.** ESI-MS spectrum

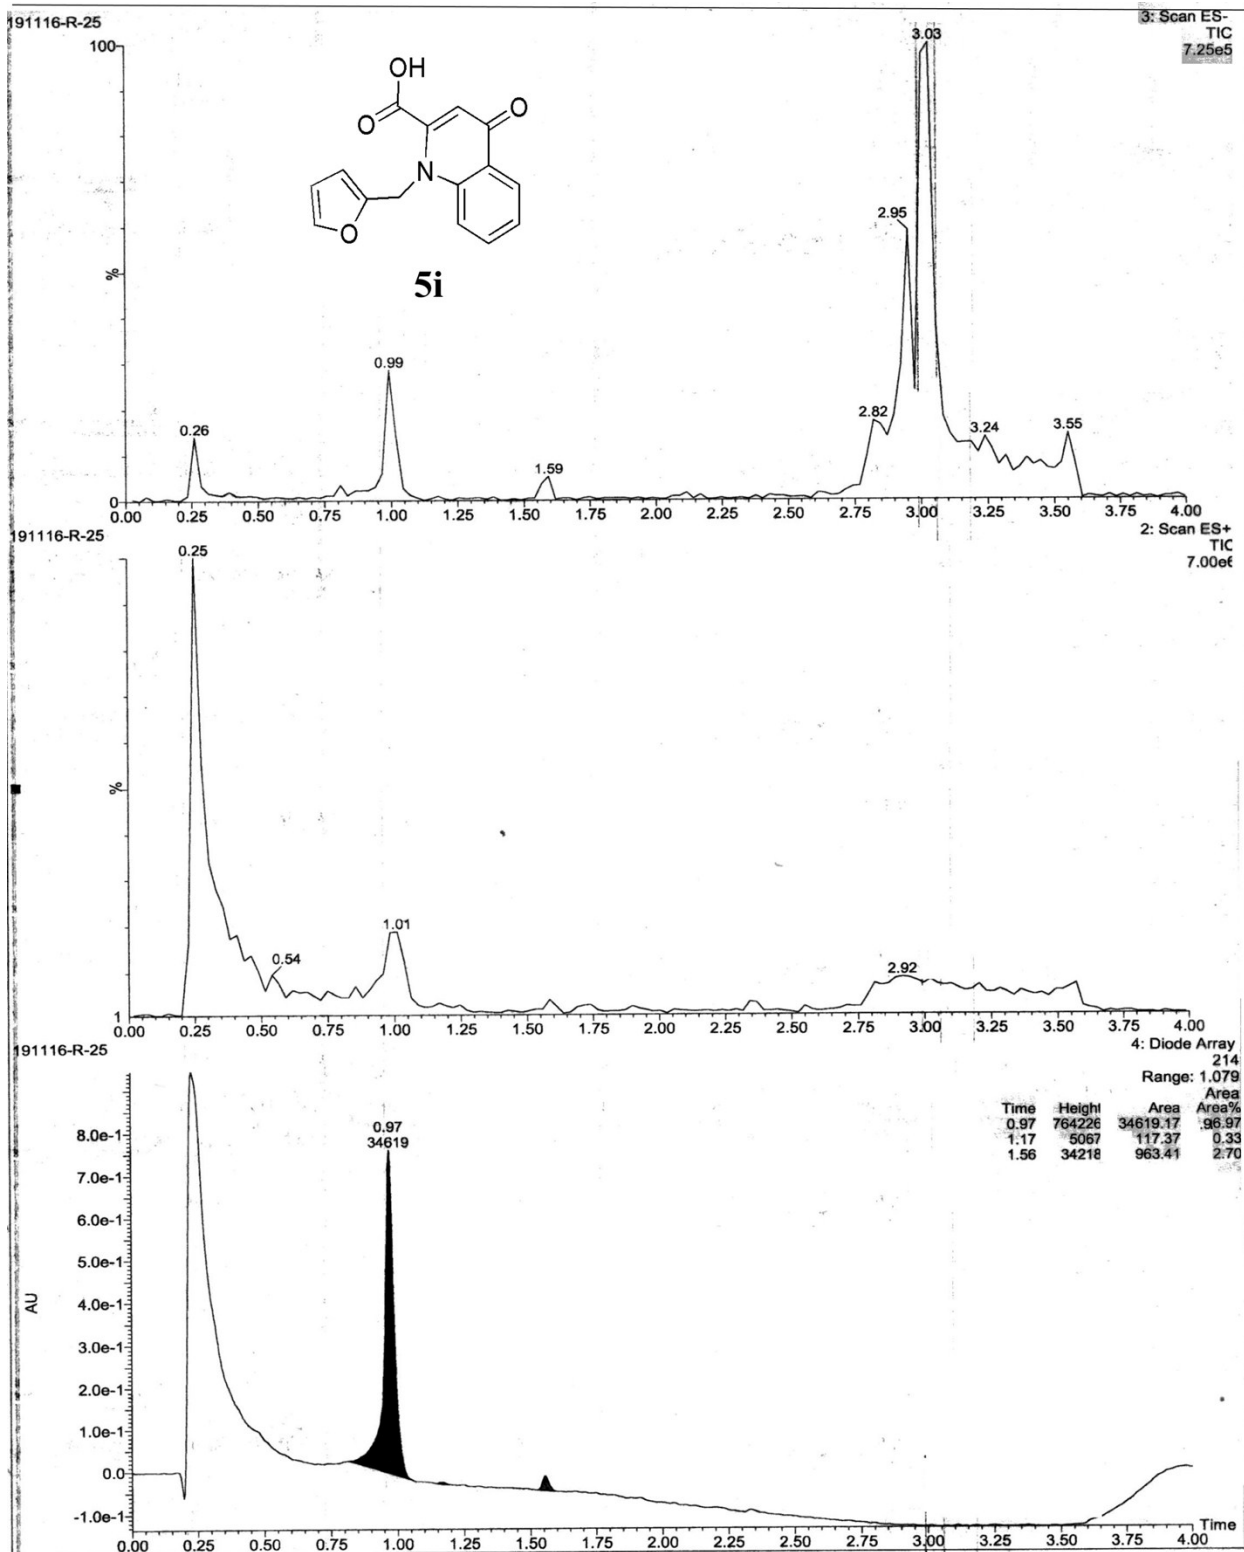

Fig. S40. HPLC spectrum

4.13. 1-((2-((2-bromo-3-fluoropyridin-4-yl)methyl)amino)phenyl)ethanone (3j)

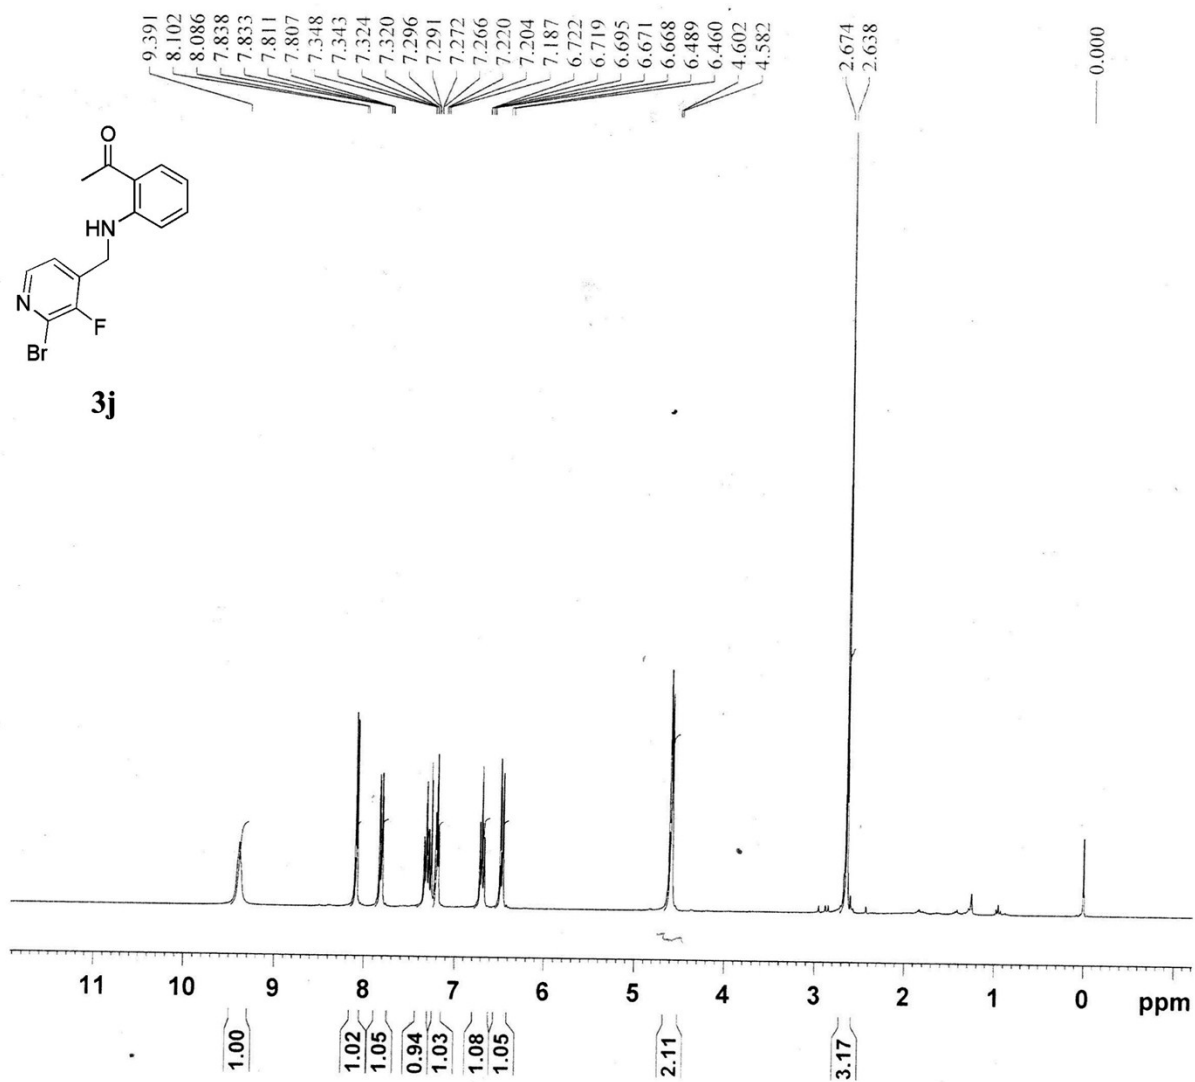

Fig. S41. <sup>1</sup>H NMR spectrum

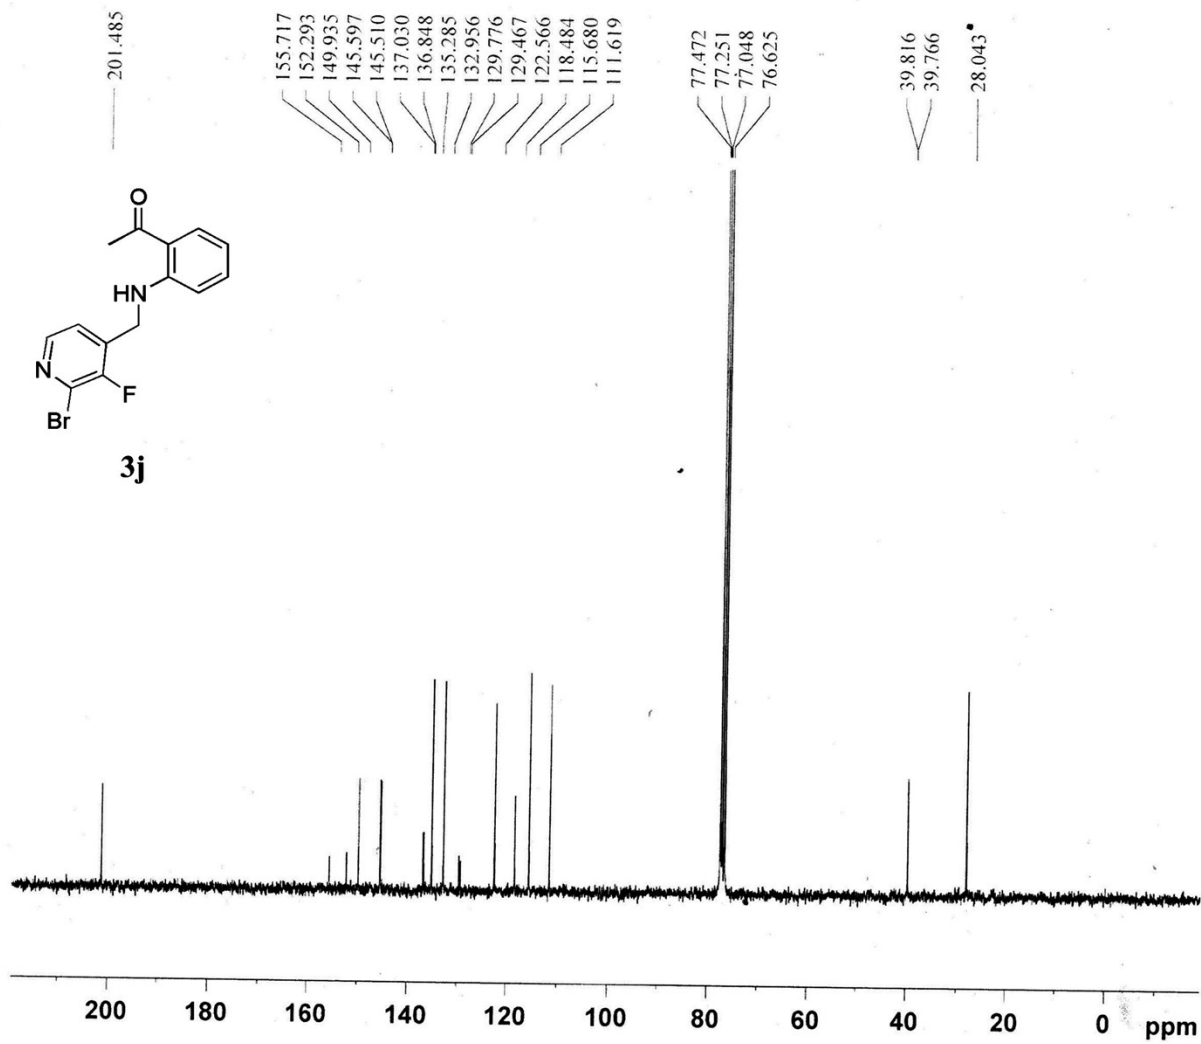

Fig. S42. <sup>13</sup>C NMR spectrum

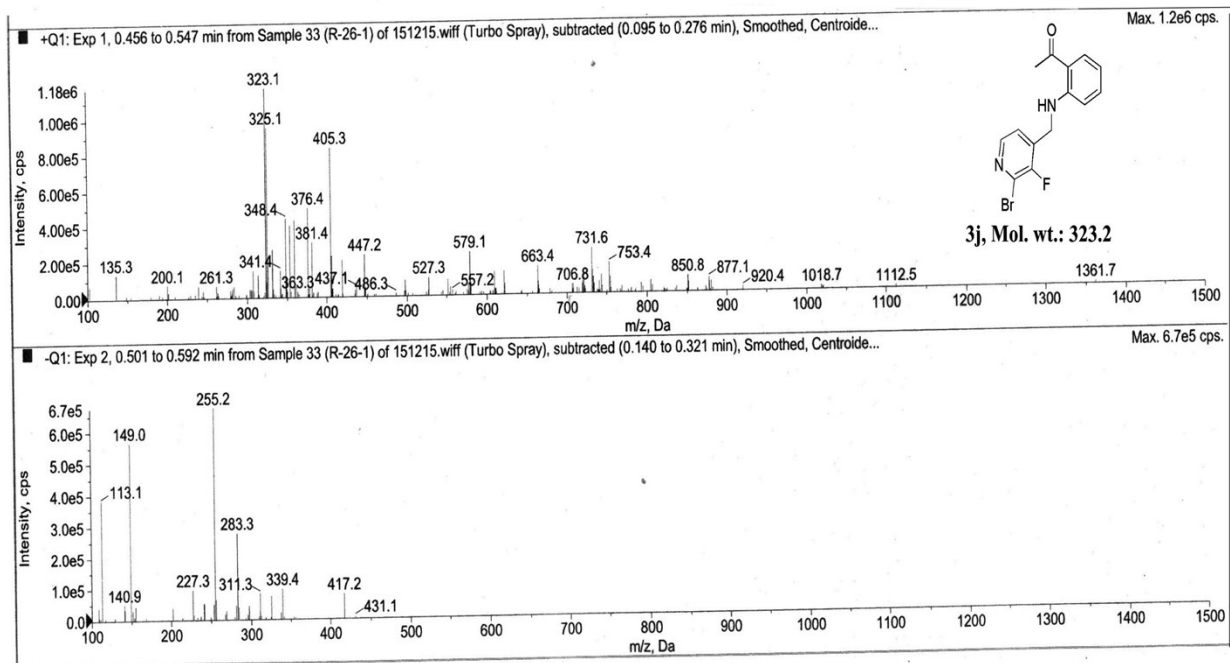

Fig. S43. ESI-MS spectrum



**4.14. Ethyl 1-((2-bromo-3-fluoropyridin-4-yl)methyl)-4-oxo-1,4-dihydroquinoline-2-carboxylate (4j)**

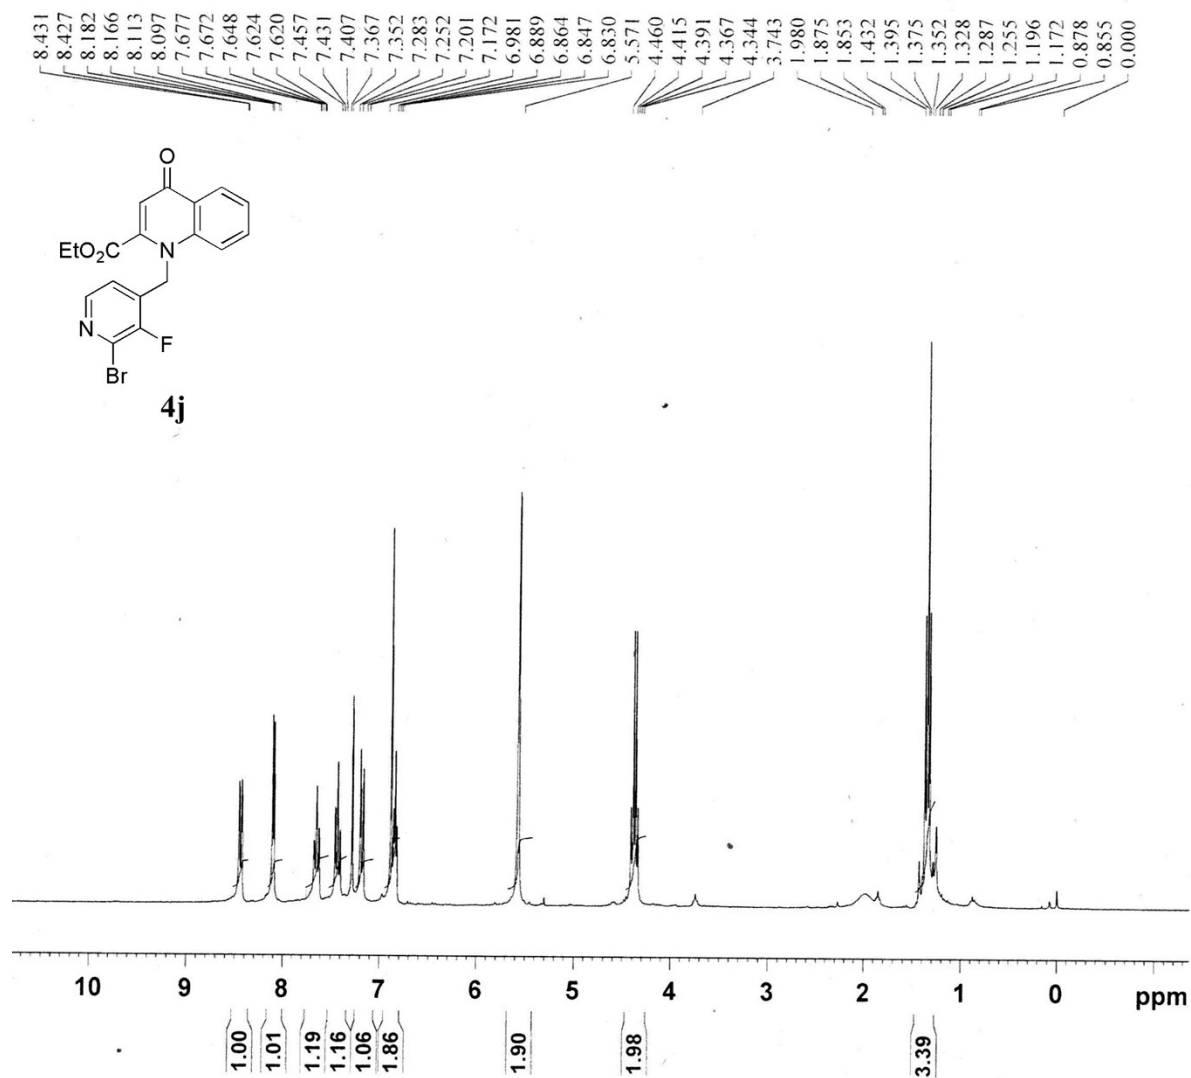

**Fig. S44.**  $^1\text{H}$  NMR spectrum

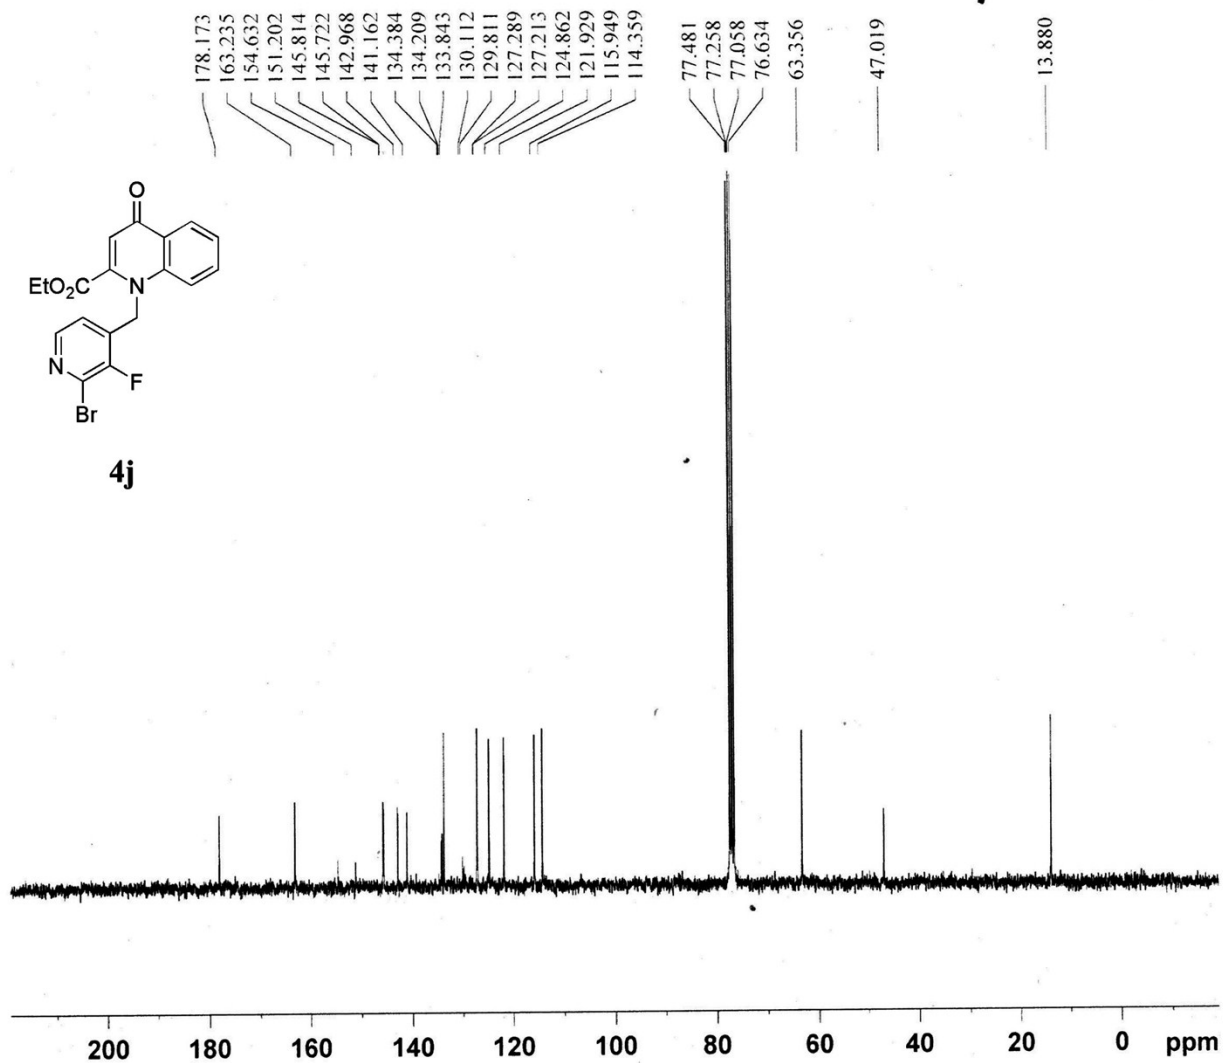

Fig. S45. <sup>13</sup>C NMR spectrum

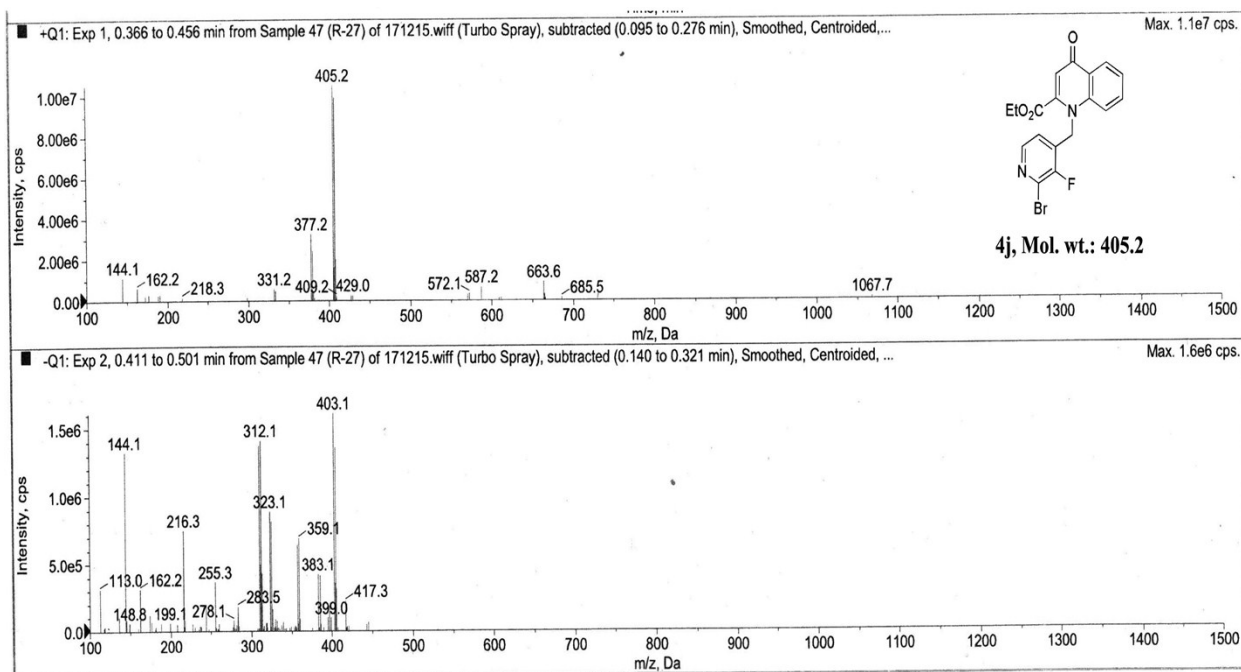

**Fig. S46.** ESI-MS spectrum

4.15. 1-((2-bromo-3-fluoropyridin-4-yl)methyl)-4-oxo-1,4-dihydroquinoline-2-carboxylic acid (**5j**)

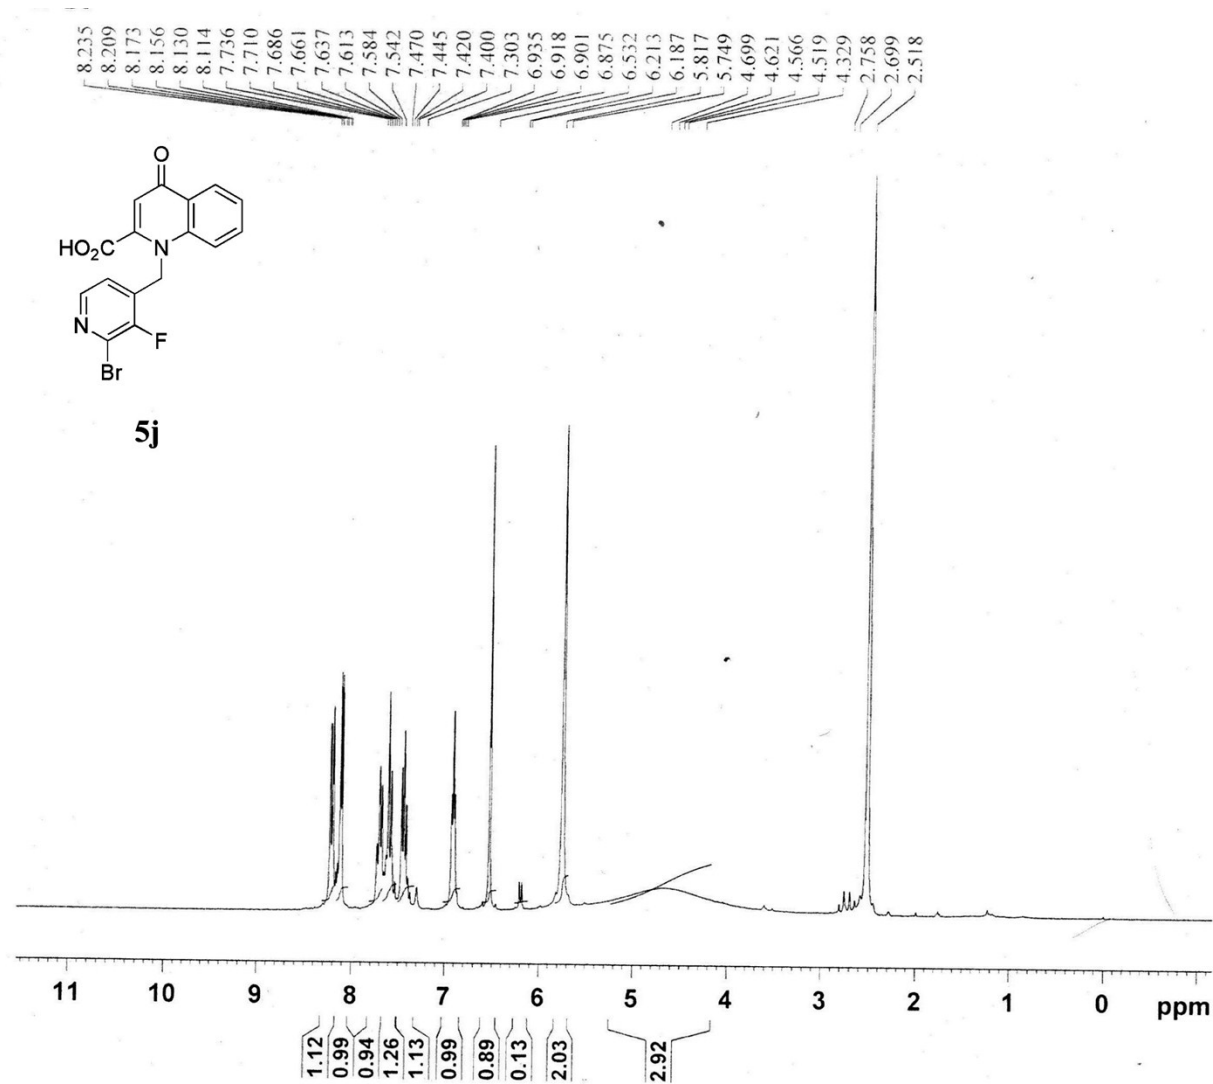

Fig. S47. <sup>1</sup>H NMR spectrum

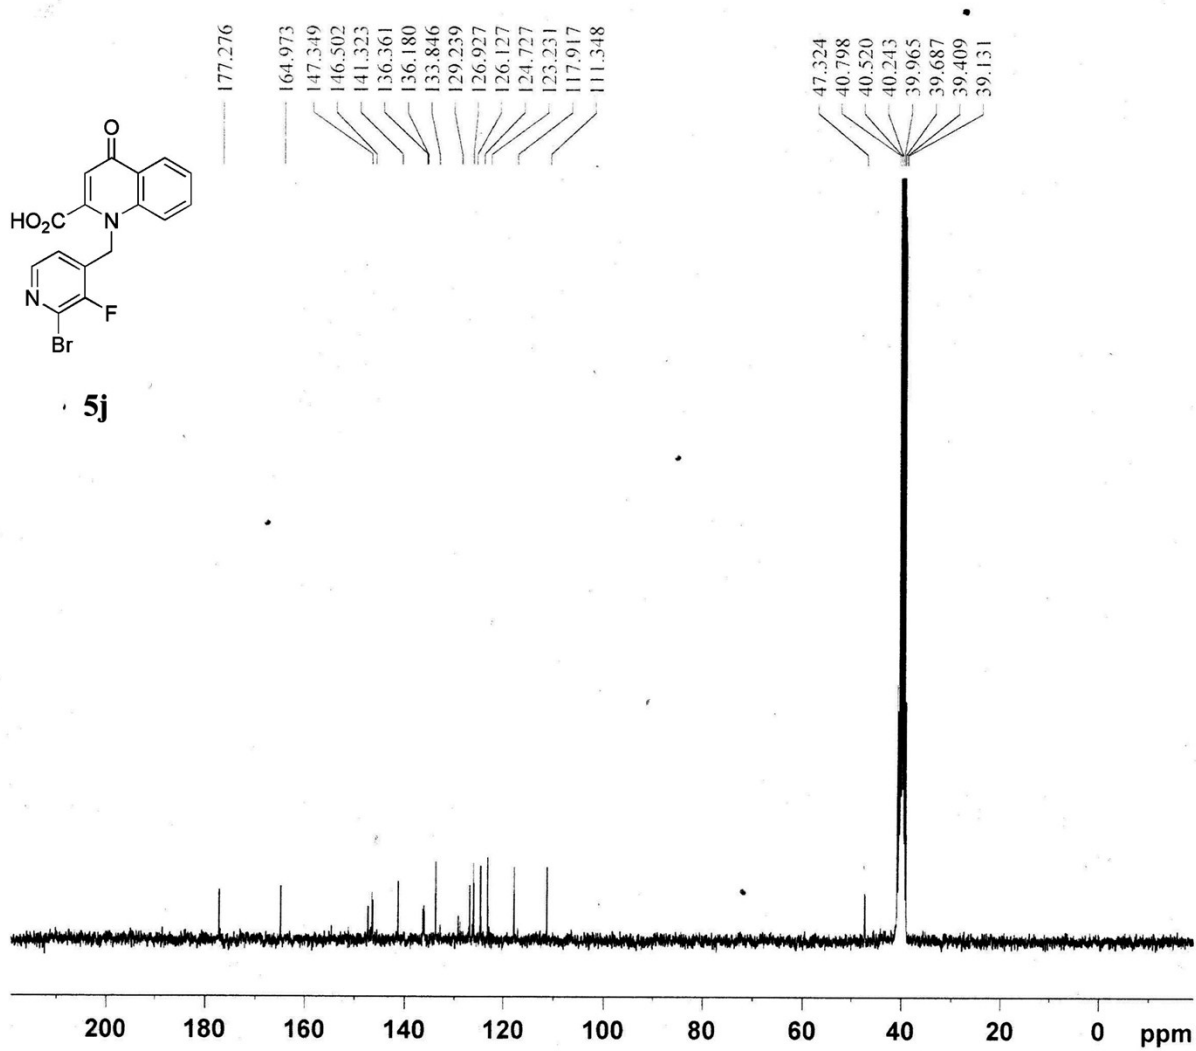

Fig. S48.  $^{13}\text{C}$  NMR spectrum

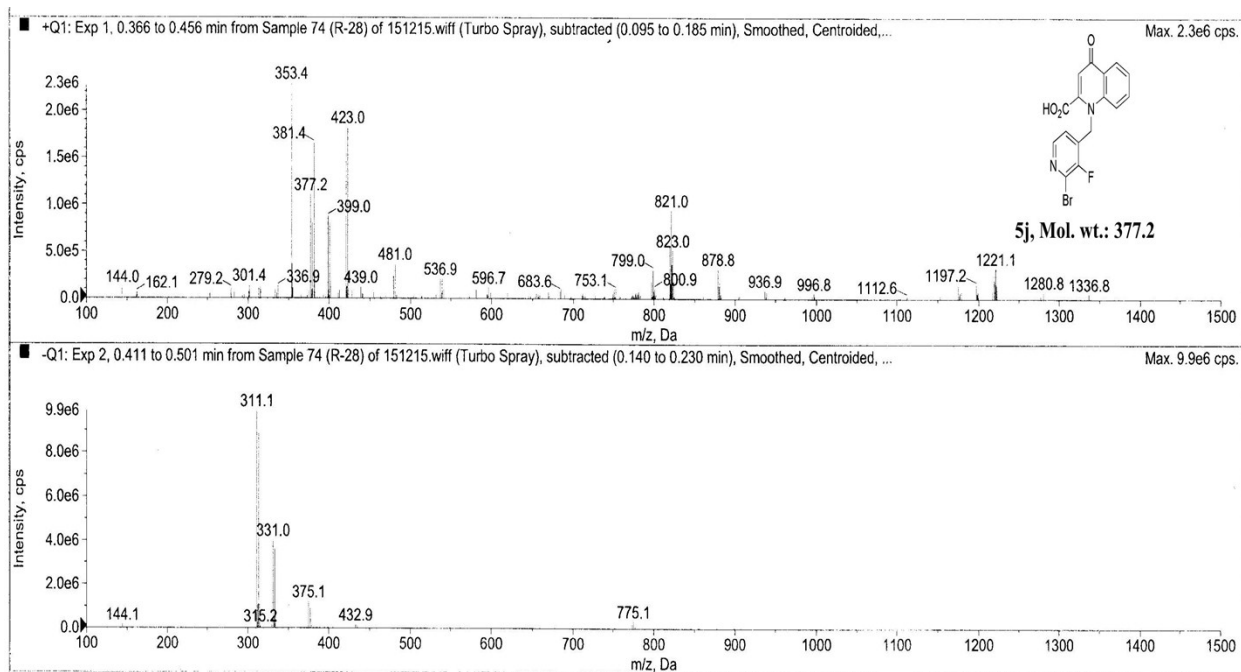

**Fig. S49.** ESI-MS spectrum

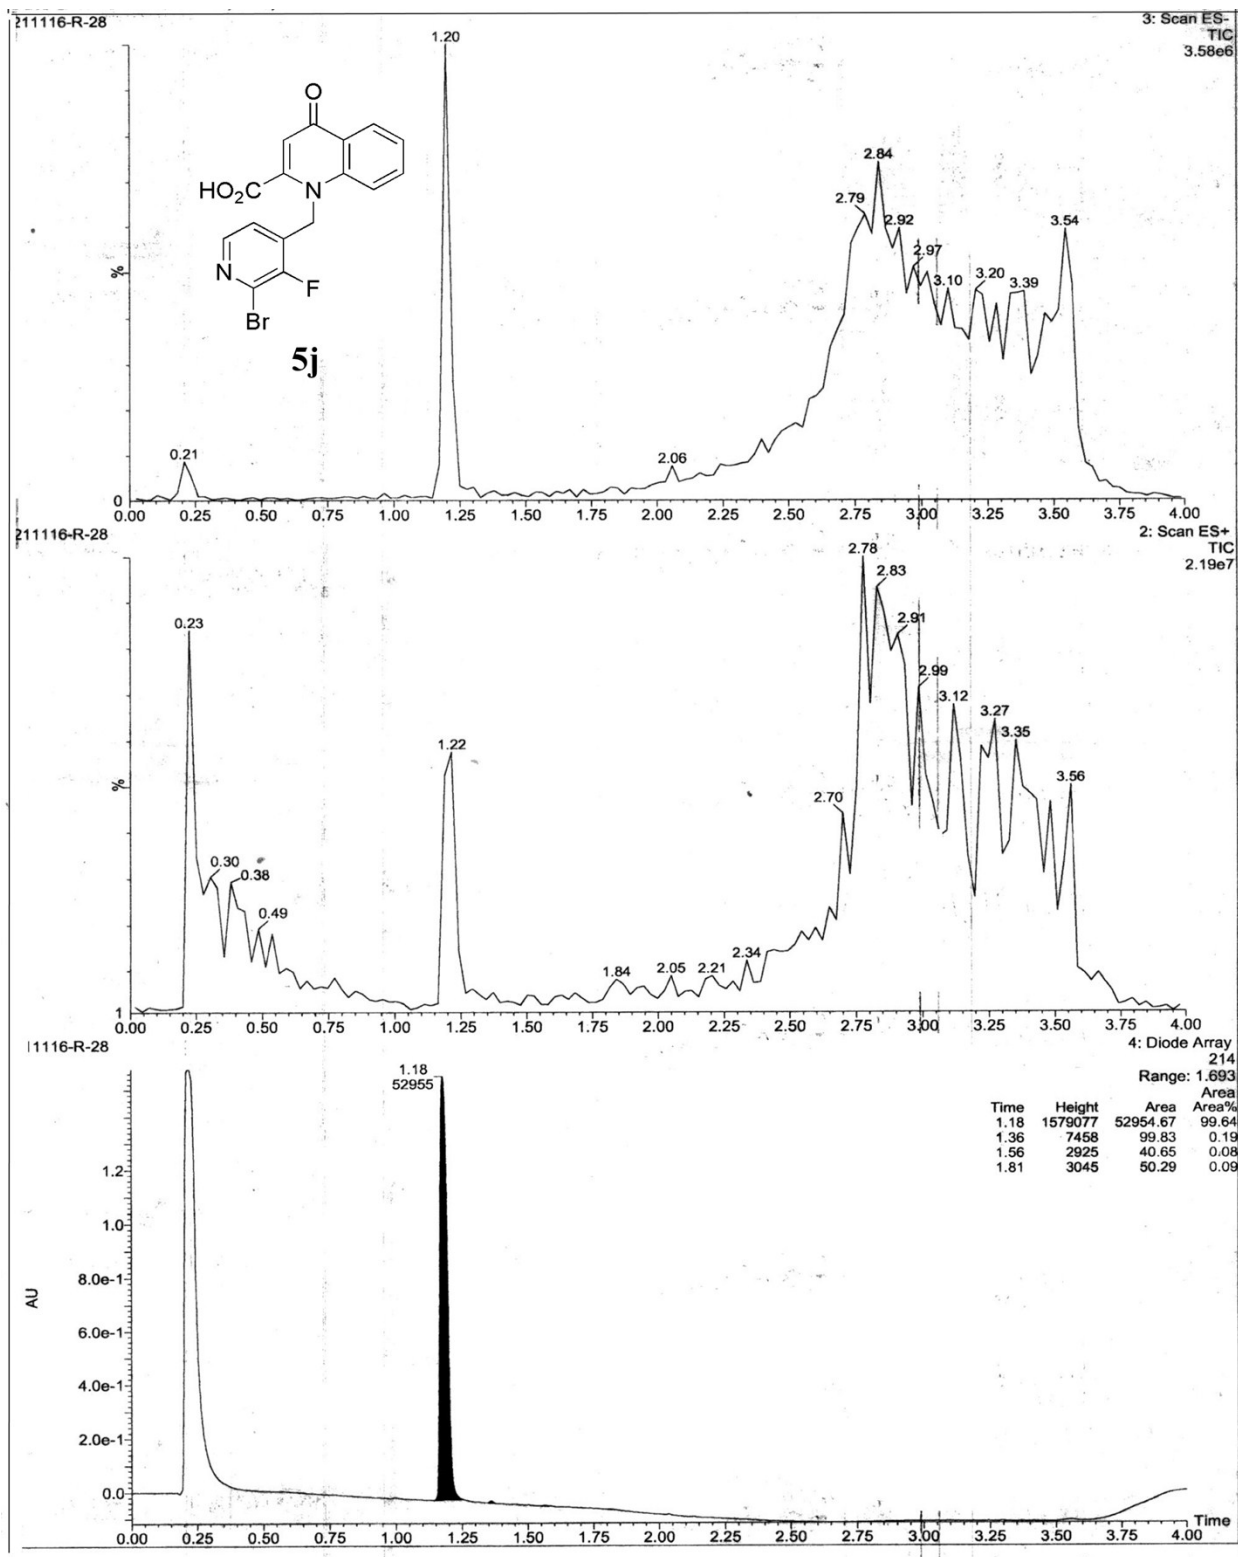

Fig. S50. HPLC spectrum

## 5. X-ray crystallographic data

The structures of **3c** and **3e** were determined by the X-ray diffraction technique. The suitable crystals of these compounds were obtained by the slow evaporation of mixed solvent system of ethanol and ethyl acetate and crystallized in P-1 and P21/n space groups, respectively. ORTEP diagram of compounds with ellipsoids drawn at 30% probability level along with their atomic numbering schemes is shown in Figure S5.1 and 5.3. Crystal structure of **3c** consist of three planar six membered rings connected with a five membered pyrazole ring. The planar six membered ring make angles of 25.5°, 17.4° and 88.1° respectively with the five member ring. Unit cell of **3c** contains two molecules of similar conformations which are interacted through aromatic  $\pi\cdots\pi$  interactions (Figure 5.2). Intramolecular N-H...O hydrogen bonding and intermolecular C-H... $\pi$  interactions also play critical roles in stabilizing the crystal structure.

Crystal structure analysis of compound **3e** shows that both the six membered rings connected through linker, are planar and also lie in the same plane (angle between the planes is 1.29°). Crystal packing diagram of **3e** shows four molecules in the unit cell forming dimer through C-H...O hydrogen bonding interactions (Figure 5.4). Intramolecular N-H...O hydrogen bonding interactions is also demonstrated by (I) in the crystal state. Several other non covalent interactions are also exhibited by the crystal packing. C7-H7A...Cg(2)(d(H... $\pi$ ) = 2.65Å, C-H... $\pi$  = 149°); C10-Cl1...Cg(1)(d(Cl... $\pi$ ) = 3.605Å, C-Cl... $\pi$  = 101.9°, symmetry position x, 1+y, z); C10-Cl1...Cg(2)(d(Cl... $\pi$ ) = 3.466Å, C-Cl... $\pi$  = 155.5°, symmetry position  $\frac{1}{2}+x$ ,  $\frac{3}{2}-y$ ,  $\frac{1}{2}+z$ ) and C13-O1...Cg(1)(d(O... $\pi$ ) = 3.553Å, C-O... $\pi$  = 91.0°, symmetry position x, -1+y, z) hydrogen bondings are also observed in the crystal structure.



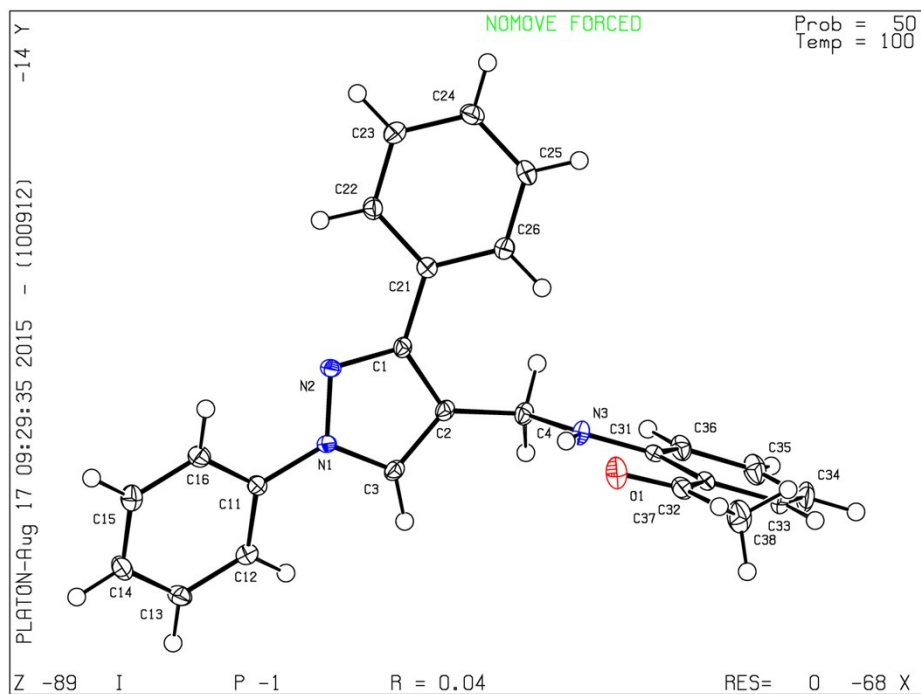

**Figure 5.1:** Crystal structure of compound 3c

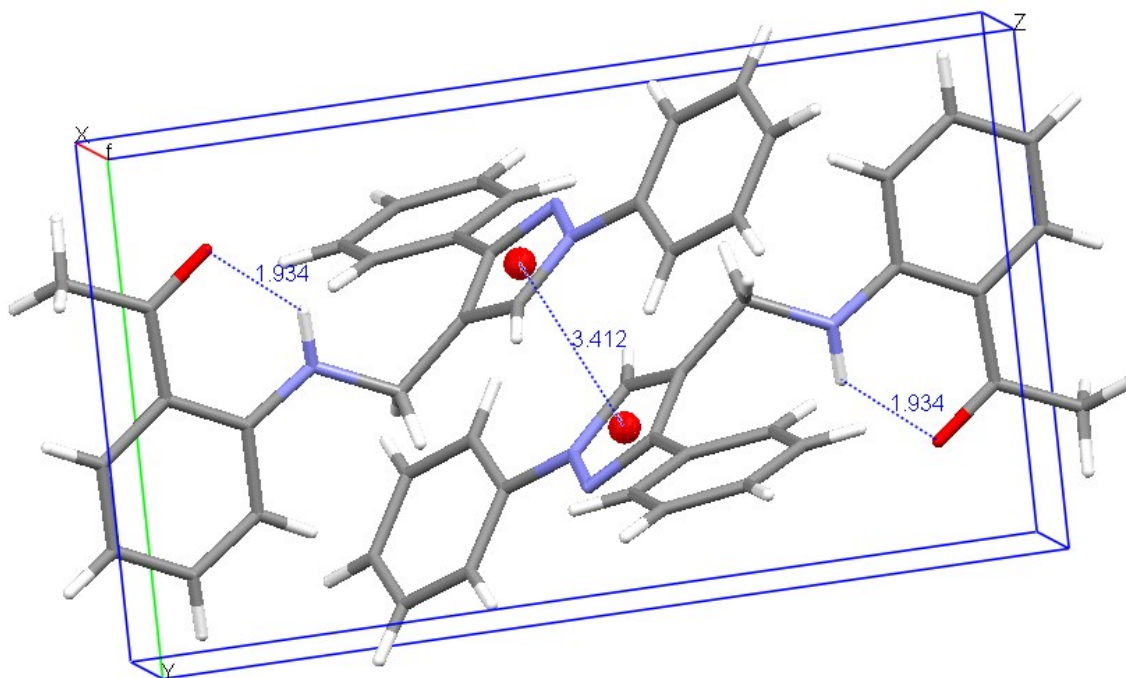

**Figure 5.2:** Unit cell in the crystal packing of compound 3c (Hydrogen bonding is shown by dotted lines)

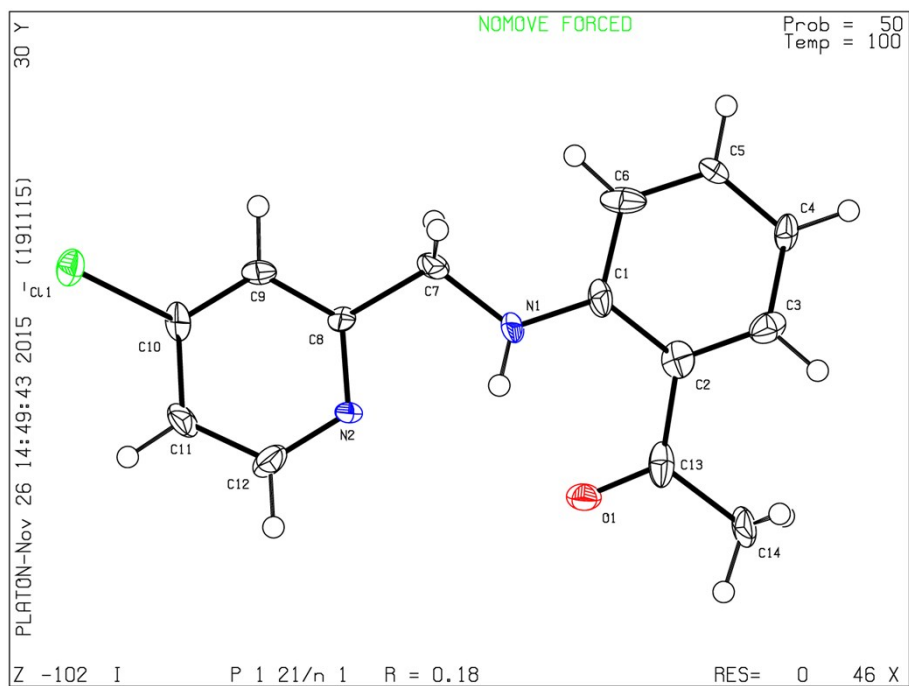

**Figure 5.3:** Crystal structure of compound **3e**

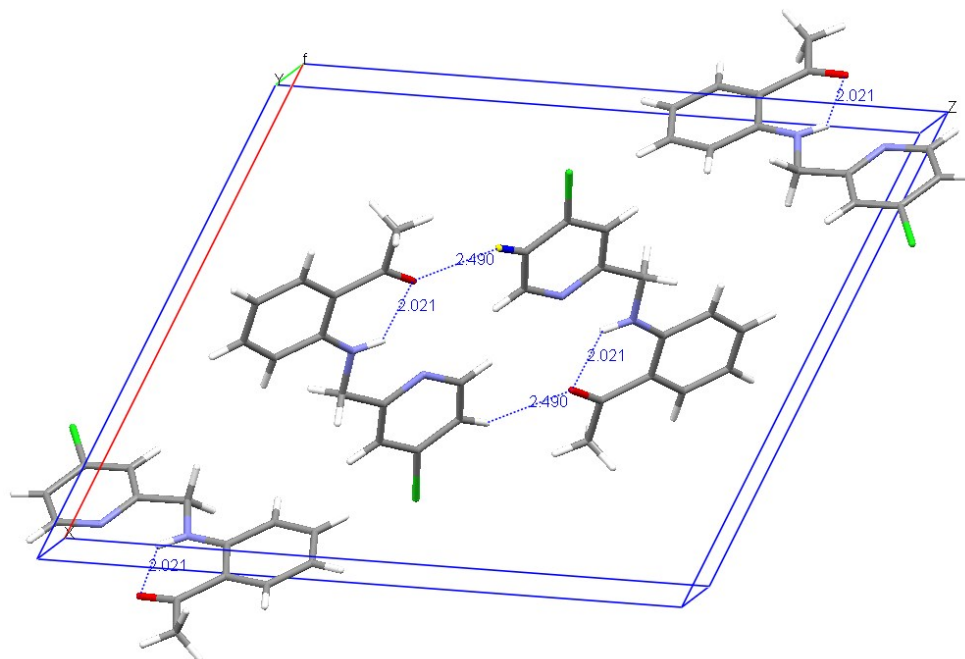

**Figure 5.4:** Unit cell in the crystal packing of compound **3e** (Hydrogen bonding is shown by dotted lines)

**Table 5.1.** Sample and crystal data for 3c and 3e.

|                        | 3c                                                                                                            | 3e                                                                                                 |
|------------------------|---------------------------------------------------------------------------------------------------------------|----------------------------------------------------------------------------------------------------|
| Chemical formula       | C <sub>24</sub> H <sub>21</sub> N <sub>3</sub> O                                                              | C <sub>14</sub> H <sub>13</sub> ClN <sub>2</sub> O                                                 |
| Formula weight         | 367.44 g/mol                                                                                                  | 260.71 g/mol                                                                                       |
| Temperature            | 100(2) K                                                                                                      | 100(2) K                                                                                           |
| Wavelength             | 0.71073 Å                                                                                                     | 1.54178 Å                                                                                          |
| Crystal size           | 0.181 × 0.370 × 0.381 mm                                                                                      | 0.032 × 0.047 × 0.469 mm                                                                           |
| Crystal habit          | colorless prism                                                                                               | colorless needle                                                                                   |
| Crystal system         | triclinic                                                                                                     | monoclinic                                                                                         |
| Space group            | P -1                                                                                                          | P1 2 <sub>1</sub> /n1                                                                              |
| Unit cell dimensions   | a = 8.5010(4) Å<br>b = 8.6149(4) Å<br>c = 13.9713(6) Å<br>α = 91.269(2)°<br>β = 94.756(2)°<br>γ = 114.531(2)° | a = 14.5288(10) Å<br>b = 5.2501(4) Å<br>c = 17.6225(12) Å<br>α = 90°<br>β = 113.257(4)°<br>γ = 90° |
| Volume                 | 925.82(7) Å <sup>3</sup>                                                                                      | 1234.98(16) Å <sup>3</sup>                                                                         |
| Z                      | 2                                                                                                             | 4                                                                                                  |
| Density (calculated)   | 1.318 g/cm <sup>3</sup>                                                                                       | 1.402 g/cm <sup>3</sup>                                                                            |
| Absorption coefficient | 0.082 mm <sup>-1</sup>                                                                                        | 2.642 mm <sup>-1</sup>                                                                             |
| F(000)                 | 388                                                                                                           | 544                                                                                                |

**Table 5.2.** Data collection and structure refinement for 3c and 3e.

|                                     | 3c                                          | 3e                                          |
|-------------------------------------|---------------------------------------------|---------------------------------------------|
| Theta range for data collection     | 2.60 to 27.10°                              | 3.36 to 64.37°                              |
| Index ranges                        | -10 ≤ h ≤ 10, -11 ≤ k ≤ 11, -17 ≤ l ≤ 17    | -16 ≤ h ≤ 16, -6 ≤ k ≤ 6, -20 ≤ l ≤ 20      |
| Reflections collected               | 16565                                       | 9359                                        |
| Independent reflections             | 4057 [R(int) = 0.0492]                      | 2017 [R(int) = 0.1326]                      |
| Coverage of independent reflections | 99.6%                                       | 97.9%                                       |
| Absorption correction               | multi-scan                                  | multi-scan                                  |
| Max. and min. transmission          | 0.9850 and 0.9690                           | 0.9200 and 0.3700                           |
| Structure solution technique        | direct methods                              | direct methods                              |
| Structure solution program          | SHELXL-2014<br>(Sheldrick, 2014)            | SHELXL-2014<br>(Sheldrick, 2014)            |
| Refinement method                   | Full-matrix least-squares on F <sup>2</sup> | Full-matrix least-squares on F <sup>2</sup> |

|                                |                                                                                                         |                                                                                                            |
|--------------------------------|---------------------------------------------------------------------------------------------------------|------------------------------------------------------------------------------------------------------------|
| Refinement program             | SHELXL-2014/7<br>(Sheldrick, 2014)                                                                      | SHELXL-2014/7<br>(Sheldrick, 2014)                                                                         |
| Function minimized             | $\Sigma w(F_o^2 - F_c^2)^2$                                                                             | $\Sigma w(F_o^2 - F_c^2)^2$                                                                                |
| Data / restraints / parameters | 4057 / 0 / 258                                                                                          | 2017 / 1 / 167                                                                                             |
| Goodness-of-fit on $F^2$       | 1.055                                                                                                   | 1.328                                                                                                      |
| Final R indices                | 3425 data; R1 = 0.0427,<br>I > 2 $\sigma$ (I) wR2 = 0.1031<br><br>all data R1 = 0.0529,<br>wR2 = 0.1095 | 1686 data; R1 = 0.1800,<br>I > 2 $\sigma$ (I) wR2 =<br>0.3342<br><br>all data R1 = 0.2002,<br>wR2 = 0.3428 |
| Weighting scheme               | $w=1/[\sigma^2(F_o^2)+(0.0492P)^2+0.3840P]$<br>where $P=(F_o^2+2F_c^2)/3$                               | $w=1/[\sigma^2(F_o^2)+(0.0001P)^2+30.4509P]$<br>where $P=(F_o^2+2F_c^2)/3$                                 |
| Largest diff. peak and hole    | 0.275 and -0.307 e $\text{\AA}^{-3}$                                                                    | 0.492 and -0.545 e $\text{\AA}^{-3}$                                                                       |
| R.M.S. deviation from mean     | 0.051 e $\text{\AA}^{-3}$                                                                               | 0.130 e $\text{\AA}^{-3}$                                                                                  |

### 5.3. X-ray crystallographic data of compound 3c

**Table 5.3.1.** Bond lengths ( $\text{\AA}$ )

|         |            |         |            |
|---------|------------|---------|------------|
| N1-C3   | 1.3592(16) | N1-N2   | 1.3622(14) |
| N1-C11  | 1.4240(16) | N2-C1   | 1.3411(16) |
| N3-C31  | 1.3653(16) | N3-C4   | 1.4612(15) |
| N3-H1   | 0.899(18)  | O1-C37  | 1.2370(16) |
| C1-C2   | 1.4249(17) | C1-C21  | 1.4697(17) |
| C2-C3   | 1.3685(18) | C2-C4   | 1.4989(17) |
| C3-H3   | 0.95       | C4-H4A  | 0.99       |
| C4-H4B  | 0.99       | C11-C16 | 1.3916(18) |
| C11-C12 | 1.3922(18) | C12-C13 | 1.3884(19) |
| C12-H12 | 0.95       | C13-C14 | 1.389(2)   |
| C13-H13 | 0.95       | C14-C15 | 1.3881(19) |
| C14-H14 | 0.95       | C15-C16 | 1.3915(18) |
| C15-H15 | 0.95       | C16-H16 | 0.95       |
| C21-C26 | 1.4026(17) | C21-C22 | 1.4027(17) |
| C22-C23 | 1.3846(18) | C22-H22 | 0.95       |
| C23-C24 | 1.3972(18) | C23-H23 | 0.95       |
| C24-C25 | 1.3910(19) | C24-H24 | 0.95       |
| C25-C26 | 1.3871(18) | C25-H25 | 0.95       |
| C26-H26 | 0.95       | C31-C36 | 1.4113(18) |
| C31-C32 | 1.4312(18) | C32-C33 | 1.4085(18) |

|          |            |          |            |
|----------|------------|----------|------------|
| C32-C37  | 1.4731(19) | C33-C34  | 1.379(2)   |
| C33-H33  | 0.95       | C34-C35  | 1.394(2)   |
| C34-H34  | 0.95       | C35-C36  | 1.3802(19) |
| C35-H35  | 0.95       | C36-H36  | 0.95       |
| C37-C38  | 1.5135(18) | C38-H38A | 0.98       |
| C38-H38B | 0.98       | C38-H38C | 0.98       |

**Table 5.3.2.** Bond angles (°)

|             |            |             |            |
|-------------|------------|-------------|------------|
| C3-N1-N2    | 111.72(10) | C3-N1-C11   | 127.43(11) |
| N2-N1-C11   | 120.82(10) | C1-N2-N1    | 104.83(10) |
| C31-N3-C4   | 122.49(11) | C31-N3-H1   | 116.1(10)  |
| C4-N3-H1    | 120.2(11)  | N2-C1-C2    | 111.16(11) |
| N2-C1-C21   | 119.90(11) | C2-C1-C21   | 128.92(11) |
| C3-C2-C1    | 104.48(11) | C3-C2-C4    | 124.89(11) |
| C1-C2-C4    | 130.40(11) | N1-C3-C2    | 107.81(11) |
| N1-C3-H3    | 126.1      | C2-C3-H3    | 126.1      |
| N3-C4-C2    | 111.27(10) | N3-C4-H4A   | 109.4      |
| C2-C4-H4A   | 109.4      | N3-C4-H4B   | 109.4      |
| C2-C4-H4B   | 109.4      | H4A-C4-H4B  | 108.0      |
| C16-C11-C12 | 120.52(12) | C16-C11-N1  | 119.92(11) |
| C12-C11-N1  | 119.56(11) | C13-C12-C11 | 119.37(12) |
| C13-C12-H12 | 120.3      | C11-C12-H12 | 120.3      |
| C12-C13-C14 | 120.69(12) | C12-C13-H13 | 119.7      |
| C14-C13-H13 | 119.7      | C15-C14-C13 | 119.42(12) |
| C15-C14-H14 | 120.3      | C13-C14-H14 | 120.3      |
| C14-C15-C16 | 120.66(12) | C14-C15-H15 | 119.7      |
| C16-C15-H15 | 119.7      | C15-C16-C11 | 119.28(12) |
| C15-C16-H16 | 120.4      | C11-C16-H16 | 120.4      |
| C26-C21-C22 | 118.41(12) | C26-C21-C1  | 121.50(11) |
| C22-C21-C1  | 120.09(11) | C23-C22-C21 | 120.81(12) |
| C23-C22-H22 | 119.6      | C21-C22-H22 | 119.6      |
| C22-C23-C24 | 120.23(12) | C22-C23-H23 | 119.9      |
| C24-C23-H23 | 119.9      | C25-C24-C23 | 119.45(12) |
| C25-C24-H24 | 120.3      | C23-C24-H24 | 120.3      |
| C26-C25-C24 | 120.38(12) | C26-C25-H25 | 119.8      |
| C24-C25-H25 | 119.8      | C25-C26-C21 | 120.69(12) |
| C25-C26-H26 | 119.7      | C21-C26-H26 | 119.7      |
| N3-C31-C36  | 120.37(11) | N3-C31-C32  | 121.16(12) |
| C36-C31-C32 | 118.47(11) | C33-C32-C31 | 118.10(12) |
| C33-C32-C37 | 120.27(12) | C31-C32-C37 | 121.63(11) |

|               |            |               |            |
|---------------|------------|---------------|------------|
| C34-C33-C32   | 122.59(13) | C34-C33-H33   | 118.7      |
| C32-C33-H33   | 118.7      | C33-C34-C35   | 118.75(12) |
| C33-C34-H34   | 120.6      | C35-C34-H34   | 120.6      |
| C36-C35-C34   | 120.95(13) | C36-C35-H35   | 119.5      |
| C34-C35-H35   | 119.5      | C35-C36-C31   | 121.13(12) |
| C35-C36-H36   | 119.4      | C31-C36-H36   | 119.4      |
| O1-C37-C32    | 122.27(12) | O1-C37-C38    | 118.15(13) |
| C32-C37-C38   | 119.57(12) | C37-C38-H38A  | 109.5      |
| C37-C38-H38B  | 109.5      | H38A-C38-H38B | 109.5      |
| C37-C38-H38C  | 109.5      | H38A-C38-H38C | 109.5      |
| H38B-C38-H38C | 109.5      |               |            |

**Table 5.3.3. Torsion angles (°)**

|                 |             |                 |             |
|-----------------|-------------|-----------------|-------------|
| C3-N1-N2-C1     | -0.07(13)   | C11-N1-N2-C1    | -178.04(10) |
| N1-N2-C1-C2     | 0.31(13)    | N1-N2-C1-C21    | 178.58(10)  |
| N2-C1-C2-C3     | -0.43(14)   | C21-C1-C2-C3    | -178.51(12) |
| N2-C1-C2-C4     | 174.22(12)  | C21-C1-C2-C4    | -3.9(2)     |
| N2-N1-C3-C2     | -0.20(14)   | C11-N1-C3-C2    | 177.60(11)  |
| C1-C2-C3-N1     | 0.37(14)    | C4-C2-C3-N1     | -174.66(11) |
| C31-N3-C4-C2    | 167.44(11)  | C3-C2-C4-N3     | -93.27(14)  |
| C1-C2-C4-N3     | 93.05(15)   | C3-N1-C11-C16   | 164.00(12)  |
| N2-N1-C11-C16   | -18.37(17)  | C3-N1-C11-C12   | -16.74(19)  |
| N2-N1-C11-C12   | 160.88(11)  | C16-C11-C12-C13 | -2.24(19)   |
| N1-C11-C12-C13  | 178.50(11)  | C11-C12-C13-C14 | 1.0(2)      |
| C12-C13-C14-C15 | 1.3(2)      | C13-C14-C15-C16 | -2.3(2)     |
| C14-C15-C16-C11 | 1.0(2)      | C12-C11-C16-C15 | 1.24(19)    |
| N1-C11-C16-C15  | -179.51(11) | N2-C1-C21-C26   | 155.09(12)  |
| C2-C1-C21-C26   | -27.0(2)    | N2-C1-C21-C22   | -24.78(18)  |
| C2-C1-C21-C22   | 153.16(13)  | C26-C21-C22-C23 | 0.16(19)    |
| C1-C21-C22-C23  | -179.97(12) | C21-C22-C23-C24 | 0.8(2)      |
| C22-C23-C24-C25 | -0.9(2)     | C23-C24-C25-C26 | -0.1(2)     |
| C24-C25-C26-C21 | 1.1(2)      | C22-C21-C26-C25 | -1.11(19)   |
| C1-C21-C26-C25  | 179.02(12)  | C4-N3-C31-C36   | 7.48(18)    |
| C4-N3-C31-C32   | -172.06(11) | N3-C31-C32-C33  | 179.06(11)  |
| C36-C31-C32-C33 | -0.48(18)   | N3-C31-C32-C37  | -0.38(18)   |
| C36-C31-C32-C37 | -179.93(11) | C31-C32-C33-C34 | 0.0(2)      |
| C37-C32-C33-C34 | 179.44(13)  | C32-C33-C34-C35 | 0.3(2)      |
| C33-C34-C35-C36 | -0.1(2)     | C34-C35-C36-C31 | -0.4(2)     |
| N3-C31-C36-C35  | -178.84(12) | C32-C31-C36-C35 | 0.71(19)    |
| C33-C32-C37-O1  | -177.34(13) | C31-C32-C37-O1  | 2.1(2)      |

C33-C32-C37-C38 1.59(19) C31-C32-C37-C38 -178.99(12)

**Table 5.3.4. Hydrogen bond distances (Å) and angles (°)**

|            | Donor-H   | Acceptor-H | Donor-Acceptor | Angle     |
|------------|-----------|------------|----------------|-----------|
| N3-H1...O1 | 0.899(18) | 1.934(17)  | 2.6518(15)     | 135.6(14) |

**5.4. X-ray crystallographic data of compound 3e**

**Table 5.4.1. Bond lengths (Å)**

|          |           |          |           |
|----------|-----------|----------|-----------|
| C11-C10  | 1.733(12) | N1-C1    | 1.333(15) |
| N1-C7    | 1.450(15) | N1-H1    | 0.86(2)   |
| N2-C12   | 1.332(16) | N2-C8    | 1.346(14) |
| O1-C13   | 1.213(15) | C1-C2    | 1.425(17) |
| C1-C6    | 1.445(17) | C2-C3    | 1.364(18) |
| C2-C13   | 1.527(18) | C3-C4    | 1.392(16) |
| C3-H3    | 0.95      | C4-C5    | 1.370(17) |
| C4-H4    | 0.95      | C5-C6    | 1.364(18) |
| C5-H5    | 0.95      | C6-H6    | 0.95      |
| C7-C8    | 1.518(16) | C7-H7A   | 0.99      |
| C7-H7B   | 0.99      | C8-C9    | 1.366(16) |
| C9-C10   | 1.361(17) | C9-H9    | 0.95      |
| C10-C11  | 1.422(17) | C11-C12  | 1.382(18) |
| C11-H11  | 0.95      | C12-H12  | 0.95      |
| C13-C14  | 1.490(18) | C14-H14A | 0.98      |
| C14-H14B | 0.98      | C14-H14C | 0.98      |

**Table 5.4.2. Bond angles (°)**

|           |           |           |           |
|-----------|-----------|-----------|-----------|
| C1-N1-C7  | 123.4(10) | C1-N1-H1  | 121.(10)  |
| C7-N1-H1  | 114.(9)   | C12-N2-C8 | 117.3(11) |
| N1-C1-C2  | 123.2(11) | N1-C1-C6  | 121.7(12) |
| C2-C1-C6  | 115.1(11) | C3-C2-C1  | 121.9(12) |
| C3-C2-C13 | 118.9(11) | C1-C2-C13 | 119.2(11) |
| C2-C3-C4  | 120.9(12) | C2-C3-H3  | 119.5     |
| C4-C3-H3  | 119.5     | C5-C4-C3  | 119.3(11) |
| C5-C4-H4  | 120.4     | C3-C4-H4  | 120.4     |
| C6-C5-C4  | 121.5(12) | C6-C5-H5  | 119.3     |
| C4-C5-H5  | 119.3     | C5-C6-C1  | 121.3(12) |
| C5-C6-H6  | 119.4     | C1-C6-H6  | 119.4     |

|               |           |               |           |
|---------------|-----------|---------------|-----------|
| N1-C7-C8      | 111.7(9)  | N1-C7-H7A     | 109.3     |
| C8-C7-H7A     | 109.3     | N1-C7-H7B     | 109.3     |
| C8-C7-H7B     | 109.3     | H7A-C7-H7B    | 107.9     |
| N2-C8-C9      | 123.7(11) | N2-C8-C7      | 116.1(10) |
| C9-C8-C7      | 120.1(10) | C10-C9-C8     | 119.3(11) |
| C10-C9-H9     | 120.4     | C8-C9-H9      | 120.4     |
| C9-C10-C11    | 118.6(11) | C9-C10-C11    | 122.2(10) |
| C11-C10-C11   | 119.2(9)  | C12-C11-C10   | 117.7(11) |
| C12-C11-H11   | 121.2     | C10-C11-H11   | 121.2     |
| N2-C12-C11    | 123.4(11) | N2-C12-H12    | 118.3     |
| C11-C12-H12   | 118.3     | O1-C13-C14    | 120.3(12) |
| O1-C13-C2     | 121.6(12) | C14-C13-C2    | 118.0(11) |
| C13-C14-H14A  | 109.5     | C13-C14-H14B  | 109.5     |
| H14A-C14-H14B | 109.5     | C13-C14-H14C  | 109.5     |
| H14A-C14-H14C | 109.5     | H14B-C14-H14C | 109.5     |

**Table 5.4.3. Torsion angles (°)**

|                |            |                 |            |
|----------------|------------|-----------------|------------|
| C7-N1-C1-C2    | 174.5(12)  | C7-N1-C1-C6     | -5.9(18)   |
| N1-C1-C2-C3    | 179.0(12)  | C6-C1-C2-C3     | -0.6(18)   |
| N1-C1-C2-C13   | -2.6(18)   | C6-C1-C2-C13    | 177.9(11)  |
| C1-C2-C3-C4    | -0.1(19)   | C13-C2-C3-C4    | -178.6(11) |
| C2-C3-C4-C5    | 1.0(19)    | C3-C4-C5-C6     | -1.(2)     |
| C4-C5-C6-C1    | 0.(2)      | N1-C1-C6-C5     | -179.0(12) |
| C2-C1-C6-C5    | 0.6(18)    | C1-N1-C7-C8     | -177.8(10) |
| C12-N2-C8-C9   | -0.2(18)   | C12-N2-C8-C7    | 179.8(11)  |
| N1-C7-C8-N2    | 4.1(15)    | N1-C7-C8-C9     | -175.9(10) |
| N2-C8-C9-C10   | 0.7(18)    | C7-C8-C9-C10    | -179.3(11) |
| C8-C9-C10-C11  | -2.1(17)   | C8-C9-C10-C11   | 177.7(9)   |
| C9-C10-C11-C12 | 2.9(18)    | C11-C10-C11-C12 | -176.9(10) |
| C8-N2-C12-C11  | 1.1(19)    | C10-C11-C12-N2  | -2.(2)     |
| C3-C2-C13-O1   | -175.6(12) | C1-C2-C13-O1    | 5.9(18)    |
| C3-C2-C13-C14  | 1.0(17)    | C1-C2-C13-C14   | -177.6(11) |

**Table 5.4.4. Hydrogen bond distances (Å) and angles (°)**

|              | Donor-H | Acceptor-H | Donor-Acceptor | Angle    |
|--------------|---------|------------|----------------|----------|
| N1-H1...N2   | 0.86(2) | 2.20(13)   | 2.652(13)      | 113.(11) |
| N1-H1...O1   | 0.86(2) | 2.02(11)   | 2.642(13)      | 129.(12) |
| C11-H11...O1 | 0.95    | 2.49       | 3.163(15)      | 127.9    |
